# Supplementary material for: Molecular design and properties of bridged energetic pyridines derivatives
Source: Royal Society of Chemistry journal article supplement (doi:10.1039/c9ra07087g), 2019-01-01
Supplement: c9ra07087g1.pdf [file c9ra07087g1.pdf]

## Supplementary Information

### Molecular design and properties of bridged energetic pyridines derivatives

Diandian Zhai,<sup>a</sup> Jinpeng Wang,<sup>a</sup> Lina Hao,<sup>a</sup> Congming Ma,<sup>\*a</sup> Peng Ma,<sup>\*a</sup> Yong Pan,<sup>\*a</sup> and Juncheng Jiang<sup>a</sup>

<sup>a</sup>College of Safety Science and Engineering, Nanjing Tech University, Nanjing, Jiangsu, CN 211800

\*Corresponding authors, E-mail: maming1306@126.com, [mpcctv@163.com](mailto:mpcctv@163.com) and [lh1083517594@gmail.com](mailto:lh1083517594@gmail.com)

#### Index

- **Computational methods**
- **Table S1.** The HOMO-LUMO pictures of B1, B2, B3, B4, B5, B8, B9 and B12.
- **Table S2.** DFT/B3LYP/6-311G(d,p) optimized geometries of B9, B10, B11 and B12
- **Table S3.** The specific data of bond order for all designed compounds
- **Table S4.** Specific data of  $C_{p,m}^{\theta}$ ,  $S_m^{\theta}$  and  $H_m^{\theta}$ , just for A1 and A2

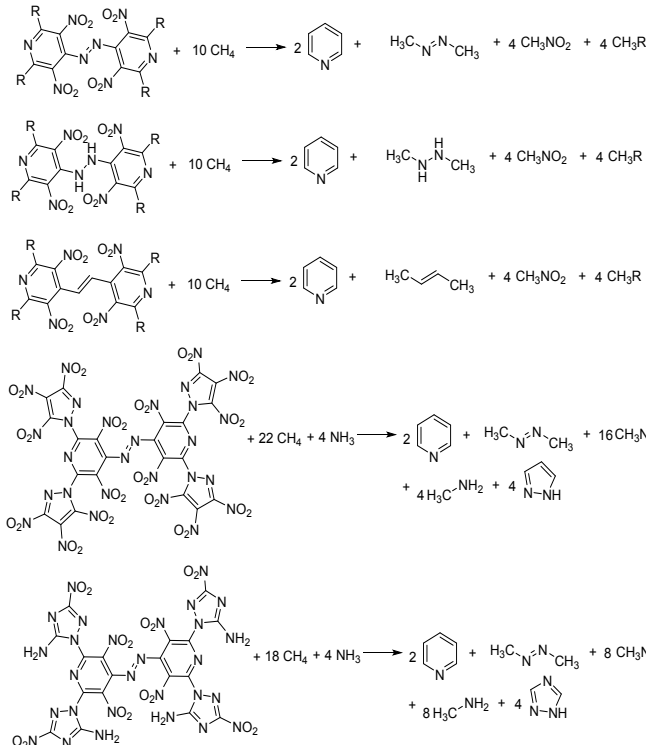

**Scheme s1** Representative isodesmic reactions for designed compounds

## Computational methods

The method of dispersion correction as an add-on to density functional theory (DFT-D3) method has been demonstrated as an economical and liable tool in predicting physical and chemical properties of energetic materials<sup>1-3</sup>. The optimized molecular structures, accurate energies, frontier molecular orbitals, heats of formation, vibrational frequencies, energetic properties, bond dissociation energies and thermodynamic parameters of the designed compounds were carried out by using the hybrid DFT/B3LYP functional with 6-311G(d,p) basis set<sup>4,5</sup>, in combination with the DFT-D3(BJ) dispersion correction<sup>6,7</sup>. All calculations were performed on the Gaussian 16 software<sup>8</sup> and the optimized structures were characterized to be the local energy minimum on the potential energy surface without imaginary frequencies. Isodesmic reactions and related equations (Scheme s1) were designed to predict accurate gas-phase HOFs ( $\Delta H_{f,gas}$ ) of the designed compound.

$$\Delta H_{298K} = \sum \Delta H_{f,p} - \sum \Delta H_{f,r} \quad (1)$$

$$\Delta H_{298K} = \Delta E_{298K} + \Delta(PV) = \Delta E_0 + \Delta ZPE + \Delta H_T + \Delta nRT \quad (2)$$

where  $\Delta H_{298K}$ , HOFs that need to be calculated;  $\Delta H_{f,p}$  and  $\Delta H_{f,r}$ , HOFs of products and reactants;  $\Delta E_0$ , energy changes between products and reactants;  $\Delta ZPE$ , difference between the zero-point energy (ZPE) of products and reactants;  $\Delta H_T$ , thermal correction from 0 to 298 K; n, number of the energetic groups;  $\Delta(PV)$  equals to  $\Delta nRT$ .

However, energetic materials were always in condensed phase while HOFs that obtained from the isodesmic reactions were in gas-phase. According to Hess's law of constant heat summation, the values of  $\Delta H_{f,gas}$  and heat of sublimation ( $\Delta H_{sub}$ ) can be used to evaluate the accurate data of solid-phase HOFs ( $\Delta H_{f,solid}$ ) based on the following equation:<sup>9</sup>

$$\Delta H_{f,solid} = \Delta H_{f,gas} - \Delta H_{sub} \quad (3)$$

where,  $\Delta H_{sub}$  is heat of sublimation. Politzer et al. proposed that  $\Delta H_{sub}$  can also be correlated with molecular surface area

A and electrostatic interaction index  $v\sigma_{tot}^2$  by the empirical expression:<sup>10</sup>

$$\Delta H_{sub} = aA^2 + b(v\sigma_{tot}^2)^{0.5} + c \quad (4)$$

where  $a$ ,  $b$  and  $c$  are coefficients and represented as  $2.670 \times 10^{-4} \text{ kcal mol}^{-1} \text{ \AA}^{-4}$ ,  $1.650 \text{ kcal mol}^{-1}$ , and  $2.966 \text{ kcal mol}^{-1}$ ;<sup>11</sup> A is the surface area of  $0.001 e \text{ bohr}^{-3}$  isosurface of electronic density of the molecule;  $v$  is the degree of balance between positive and negative potential on the isosurface;

$\sigma_{tot}^2$  is the measure of variability of the electrostatic potential on molecular surface, which can be obtained via the Multiwfn program<sup>12</sup>.

Densities ( $\rho$ ) that used to calculate the detonation velocity and detonation pressure were obtained by an improved equation proposed by Politzer et al.<sup>13</sup>

$$\rho = \beta_1 \left( \frac{M}{V} \right) + \beta_2 (v\sigma_{tot}^2) + \beta_3 \quad (5)$$

where  $\beta_1$ ,  $\beta_2$ , and  $\beta_3$  are coefficients and represented as 0.9183, 0.0028, and 0.0443, respectively,  $M$  stands for the molecular mass ( $\text{g mol}^{-1}$ ),  $V$  stands for the volume of a molecule ( $\text{m}^3 \text{ mol}^{-1}$ ),  $v$  stands for the degree of balance between positive and negative potential on the isosurface and  $\sigma_{tot}^2$  stands for measure of variability of the electrostatic potential on the molecular surface.

Energetic properties (detonation velocity and detonation pressures) were estimated by the Kamlet-Jacobs equations:<sup>14</sup>

$$D = 1.01(N\bar{M}^{0.5}Q^{0.5})^{0.5}(1 + 1.3\rho) \quad (6)$$

$$P = 1.558\rho^2 N\bar{M}^{0.5}Q^{0.5} \quad (7)$$

where D is the detonation velocity ( $\text{km s}^{-1}$ ); P is the detonation pressure (GPa);  $N$ ,  $\bar{M}$  and  $Q$  are the moles of

detonation gases per-gram explosive ( $\text{mol g}^{-1}$ ), the average molecular weight of these gases ( $\text{g mol}^{-1}$ ) and heat of detonation ( $\text{cal g}^{-1}$ ), respectively.

Bond dissociation energy (BDE), regarded as the strength of bonding, is an important indicator in predicting the way of bond cleavage and thermal decomposition mechanism of high energy density material. The homolytic BDEs were presented by the following equation:

$$\text{BDE}_0(\text{A-B}) = E_0(\text{A}\cdot) + E_0(\text{B}\cdot) - E_0(\text{A-B}) \quad (8)$$

The BDEs with zero-point energy (ZPE) corrections were finally calculated based on the following equation:

$$\text{BDE}(\text{A-B})_{\text{ZPE}} = \text{BDE}_0(\text{A-B}) + \Delta E_{\text{ZPE}} \quad (9)$$

where  $\Delta E_{\text{ZPE}}$  is the difference between ZPEs of products and reactants.

## References

1. G. Bélanger-Chabot, M. Rahm, R. Haiges, K.O. Christe, *Angew. Chem.*, 2015,127(40), 11896-11900.
2. J.Y. Fan, Z.Y. Zheng, Y. Su, and J.J. Zhao, *Mol. Simulat.*, 2017, 43(7), 568-574.
3. D. C. Sorescu, & B. M. Rice, *J Phys. Chem. C*, 2010,114(14), 6734-6748.
4. Q. Wu, W. Zhu and H. Xiao, *J. Chem. Eng. Data.*, 2013, 58, 2748-2762.
5. F. Wang, G. Wang, H. Du, J. Zhang and X. Gong, *J. Phys. Chem. A*, 2011, 115, 13858-13864.
6. J. Moellmann and S. Grimme, *J. Phys. Chem. C*, 2014,118, 7615-7621.
7. Goerigk, L., Hansen, A., Bauer, C., Ehrlich, S., Najibi, A. and Grimme, S. *Phys. Chem. Chem. Phys.*, 2017, 19, 32184-32215.
8. M. J. Frisch, G. W. Trucks, H. B. Schlegel, et al. Gaussian 16, revision A.03, Gaussian, Inc., Wallingford CT, 2016.
9. P. W. Atkins. *Physical chemistry, 2nd edn.* Oxford University Press: Oxford, 1982.
10. P. Politzer, Y. Ma, P. Lane and M. C. Concha, *Int. J. Quantum Chem.*, 2005, 105, 341-347.
11. E. F. C. Byrd and B. M. Rice, *J. Phys. Chem. A*, 2006, 110, 1005-1013.
12. T. Lu and F. Chen, *J. Comput. Chem.*, 2012, 33, 580 –592.
13. P. Politzer, J. Martinez, J. S. Murray, M. C. Concha, A. Toro-Labbe, *Mol. Phys.*, 2009, 107, 2095-2101.
14. M. J. Kamlet and S. J. Jacobs, *J. Chem. Phys.*, 1968, 48, 23-35.

**Table S1.** The HOMO-LUMO pictures of B1, B2, B3, B4, B5, B8, B9 and B12.

| Comp. | LUMO                                                                                | HOMO                                                                                 |
|-------|-------------------------------------------------------------------------------------|--------------------------------------------------------------------------------------|
| B1    | 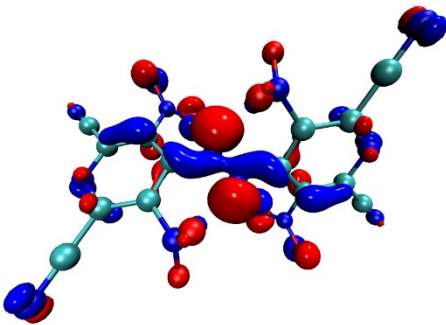   |    |
| B2    |   |   |
| B3    |  |  |
| B4    |  |  |

| Comp. | LUMO                                                                                | HOMO                                                                                 |
|-------|-------------------------------------------------------------------------------------|--------------------------------------------------------------------------------------|
| B5    | 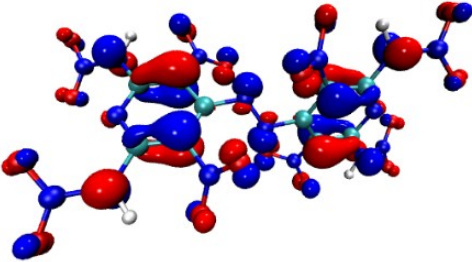   |    |
| B8    |    |    |
| B9    |  |  |
| B12   |  |  |

**Table S2.** DFT/B3LYP/6-311G(d,p) optimized geometries of B9, B10, B11 and B12.

| [B9] |             |             |             | [B10] |             |             |             |
|------|-------------|-------------|-------------|-------|-------------|-------------|-------------|
| 0 1  |             |             |             | 0 1   |             |             |             |
| N    | 0.43002200  | 0.33972700  | 0.66380600  | N     | -0.51253200 | -0.52728100 | -0.13064100 |
| N    | -0.35562400 | 0.22052800  | -0.28508000 | N     | 0.22624500  | 0.40145900  | -0.49376300 |
| C    | 1.79215400  | 0.19650200  | 0.30556400  | C     | -1.89277900 | -0.21854600 | -0.13163000 |
| C    | -1.73479100 | 0.23819600  | 0.03941600  | C     | 1.61274800  | 0.15149600  | -0.36552500 |
| C    | 2.29259400  | -0.77247000 | -0.56863100 | C     | -2.75533700 | -1.26970500 | -0.44687400 |
| C    | 3.67334200  | -0.86487400 | -0.73705700 | C     | -4.12876800 | -1.02750900 | -0.44623100 |
| N    | 4.53534300  | -0.06999000 | -0.13754400 | N     | -4.62949600 | 0.12829100  | -0.02345200 |
| C    | 4.07209800  | 0.85617200  | 0.67898200  | C     | -3.82507300 | 1.12149200  | 0.34380100  |
| C    | 2.71918600  | 1.02264200  | 0.94611900  | C     | -2.43123800 | 1.01488200  | 0.24425300  |
| C    | -2.35827000 | -0.78940900 | 0.75269700  | C     | 2.18430500  | -0.57720700 | 0.67099800  |
| C    | -3.74666900 | -0.75676400 | 0.88155200  | C     | 3.59197500  | -0.64078200 | 0.73641000  |
| N    | -4.50620000 | 0.18701400  | 0.36081000  | N     | 4.34936400  | -0.01280500 | -0.14664300 |
| C    | -3.93430900 | 1.11354400  | -0.38136000 | C     | 3.83048800  | 0.67257000  | -1.15440600 |
| C    | -2.55899800 | 1.19603700  | -0.56502400 | C     | 2.45235000  | 0.77451900  | -1.31133100 |
| C    | -5.89967900 | 3.90075800  | -0.99971600 | C     | -5.69761600 | -3.60409100 | -2.09610200 |
| N    | -5.03234000 | 3.23074500  | -0.26004800 | N     | -4.63303700 | -2.90833900 | -1.83556500 |
| N    | -4.81484300 | 2.09586600  | -0.93147800 | N     | -5.04969200 | -1.96997700 | -0.90691100 |
| C    | -5.53574700 | 2.03712400  | -2.09201200 | C     | -6.39150900 | -2.08792700 | -0.60371100 |
| C    | -6.25881400 | 3.20262700  | -2.16765500 | C     | -6.83816700 | -3.16090600 | -1.37991500 |
| C    | -4.81044800 | -2.86455200 | 3.40102600  | N     | -7.08474700 | -1.30121600 | 0.23514700  |
| N    | -3.94462000 | -2.01763200 | 2.88736000  | C     | -4.57427700 | 4.09766800  | 1.89597800  |
| N    | -4.41345700 | -1.73757700 | 1.65866800  | N     | -3.74118100 | 3.13736900  | 1.63609300  |
| C    | -5.58293200 | -2.40503100 | 1.39680200  | N     | -4.45506600 | 2.26555200  | 0.82872700  |
| C    | -5.87118900 | -3.14755700 | 2.51449600  | C     | -5.75350100 | 2.69671900  | 0.60577500  |
| C    | 5.98417300  | 3.58896800  | 1.59294000  | C     | -5.84177200 | 3.91544600  | 1.29073000  |
| N    | 4.97424100  | 3.04049100  | 0.94450000  | N     | -6.68019800 | 2.06834500  | -0.11602100 |
| N    | 5.02864400  | 1.73867400  | 1.25509200  | C     | 6.83444600  | 0.98491300  | -2.68304100 |
| C    | 6.06534100  | 1.45798800  | 2.10482000  | N     | 5.81346200  | 0.25934300  | -2.34388300 |
| C    | 6.71510300  | 2.64520700  | 2.34019200  | N     | 4.80550600  | 1.17889100  | -2.05013100 |
| C    | 4.62693000  | -3.86704700 | -2.16110700 | C     | 5.26249900  | 2.48372100  | -2.14944700 |
| N    | 3.93325900  | -3.16414700 | -1.28779500 | C     | 6.58254000  | 2.37558800  | -2.60626400 |
| N    | 4.21943400  | -1.88334100 | -1.56564400 | N     | 4.57666000  | 3.57017400  | -1.78268900 |
| C    | 5.09314900  | -1.77110900 | -2.61500600 | C     | 4.56930800  | -2.30103700 | 3.57716300  |
| C    | 5.38413000  | -3.04944800 | -3.02409900 | N     | 3.66284600  | -1.65918300 | 2.90562700  |
| N    | 1.39787800  | -1.68846100 | -1.31949300 | N     | 4.28439700  | -1.34207900 | 1.70771300  |
| O    | 1.55733200  | -1.70323800 | -2.52334800 | C     | 5.60485200  | -1.79035600 | 1.65210500  |
| O    | 0.60623100  | -2.34232400 | -0.67113200 | C     | 5.79400000  | -2.44076700 | 2.88031100  |
| N    | -1.59420600 | -1.94509900 | 1.29213400  | N     | 6.44324200  | -1.64723400 | 0.63354400  |
| O    | -1.95124400 | -3.03370000 | 0.88663100  | N     | -2.16930600 | -2.60208100 | -0.71903500 |
| O    | -0.70412600 | -1.70034300 | 2.07902000  | O     | -1.38478400 | -2.67369000 | -1.64220300 |
| N    | 2.24092300  | 2.05281200  | 1.89389600  | O     | -2.51268600 | -3.48520200 | 0.04122500  |
| O    | 1.28011800  | 2.70552100  | 1.53768200  | N     | 1.31832300  | -1.31413000 | 1.62990200  |
| O    | 2.85143000  | 2.14225400  | 2.94335800  | O     | 1.30234600  | -2.51701500 | 1.48311500  |
| N    | -1.94493700 | 2.25072600  | -1.39708700 | O     | 0.70581800  | -0.64728200 | 2.43580000  |
| O    | -2.58880400 | 2.65201200  | -2.34922200 | N     | -1.53541100 | 2.17412000  | 0.49014900  |
| O    | -0.83266800 | 2.61895300  | -1.06281200 | O     | -1.61355900 | 3.06583700  | -0.33089600 |
| N    | -6.37795800 | 5.21947900  | -0.58778000 | O     | -0.80243400 | 2.11241900  | 1.45339200  |
| O    | -5.97906000 | 5.65693700  | 0.47054300  | N     | 1.83252600  | 1.36269300  | -2.50261700 |
| O    | -7.14598200 | 5.75235500  | -1.37494100 | O     | 0.90853600  | 0.74946700  | -2.99878500 |
| N    | -5.41053300 | 0.95315900  | -3.03573900 | O     | 2.29806900  | 2.41681100  | -2.92073000 |
| O    | -4.54748400 | 0.11740700  | -2.79562600 | N     | -5.62742700 | -4.64219500 | -3.13558000 |
| O    | -6.16659400 | 0.97981000  | -3.98666000 | O     | -4.83360100 | -5.54268900 | -2.95687800 |
| N    | -7.18239500 | 3.60748600  | -3.23643800 | O     | -6.36377800 | -4.47116000 | -4.08907900 |
| O    | -8.34969300 | 3.33595100  | -3.05209600 | N     | -8.13390300 | -3.73954500 | -1.29617100 |
| O    | -6.67894600 | 4.16744000  | -4.18654800 | O     | -8.96691800 | -3.13297100 | -0.60645800 |
| N    | -4.59441300 | -3.43735700 | 4.73199500  | O     | -8.33689300 | -4.78358000 | -1.88936600 |
| O    | -3.75134200 | -2.91878700 | 5.43182200  | N     | -4.10723500 | 5.24343400  | 2.69097800  |
| O    | -5.29780300 | -4.40035600 | 4.99334500  | O     | -3.74403300 | 5.00850000  | 3.82584200  |
| N    | -6.27809200 | -2.36738300 | 0.12220600  | O     | -4.11278000 | 6.31329600  | 2.11359200  |
| O    | -5.61245300 | -2.08405000 | -0.86059000 | N     | -7.02729200 | 4.68196200  | 1.43323500  |
| O    | -7.46081900 | -2.64753800 | 0.16200600  | O     | -7.01531900 | 5.62124600  | 2.21047900  |
| N    | -7.02647900 | -4.03007700 | 2.71571400  | O     | -8.00219100 | 4.32730300  | 0.75379300  |
| O    | -7.05049800 | -5.04017200 | 2.04412100  | N     | 8.04928000  | 0.28270700  | -3.12335800 |
| O    | -7.83803400 | -3.64847700 | 3.53235100  | O     | 8.43174200  | 0.51780200  | -4.25025200 |
| N    | 6.23544800  | 5.02831900  | 1.51314100  | O     | 8.53667800  | -0.49248300 | -2.31786600 |
| O    | 5.54543600  | 5.67677700  | 0.75646500  | N     | 7.47282000  | 3.46523800  | -2.80625800 |
| O    | 7.13273400  | 5.42947400  | 2.23890300  | O     | 6.99815300  | 4.60231300  | -2.68459800 |
| N    | 6.29473900  | 0.15206100  | 2.68211900  | O     | 8.63664400  | 3.21242700  | -3.06974800 |
| O    | 5.39304900  | -0.66672900 | 2.56601100  | N     | 4.21501300  | -2.84439200 | 4.89714000  |

|   |            |             |             |   |             |             |             |
|---|------------|-------------|-------------|---|-------------|-------------|-------------|
| O | 7.36108300 | 0.00091900  | 3.24629300  | O | 3.92150400  | -2.03849300 | 5.75743300  |
| N | 7.89382000 | 2.85785700  | 3.19119200  | O | 4.23089200  | -4.05669100 | 4.98297800  |
| O | 8.95453200 | 2.92398600  | 2.60774900  | N | 7.02325100  | -2.98393700 | 3.33283700  |
| O | 7.68058200 | 2.94091700  | 4.38187500  | O | 7.09545600  | -3.34916900 | 4.49546200  |
| N | 4.53673800 | -5.32814600 | -2.18899900 | O | 7.94400900  | -3.04020100 | 2.50629500  |
| O | 3.93485600 | -5.86873500 | -1.28661800 | H | -6.59372200 | -0.73734300 | 0.90985000  |
| O | 5.08675100 | -5.85395300 | -3.14455500 | H | -8.02368800 | -1.63212600 | 0.43158800  |
| N | 5.49387400 | -0.50649800 | -3.19719700 | H | -6.52235600 | 1.14168600  | -0.47641600 |
| O | 6.47677600 | -0.54169500 | -3.91195700 | H | -7.56499500 | 2.55174600  | -0.21077300 |
| O | 4.79828600 | 0.46405200  | -2.93606600 | H | 3.56919100  | 3.53521000  | -1.85876600 |
| N | 6.27401700 | -3.44631100 | -4.12320100 | H | 5.04748800  | 4.44088600  | -2.00366600 |
| O | 7.35595000 | -3.87921200 | -3.78882100 | H | 6.22457300  | -1.05826300 | -0.15796000 |
| O | 5.83489200 | -3.29489600 | -5.24361100 | H | 7.35479400  | -2.07351500 | 0.74886200  |

[B11]

|     |             |             |             |
|-----|-------------|-------------|-------------|
| 0 1 |             |             |             |
| N   | 0.38150100  | -0.48977900 | -0.17965000 |
| N   | -0.38152200 | 0.48979900  | -0.17967900 |
| C   | 1.75440500  | -0.15677700 | -0.11820700 |
| C   | -1.75442400 | 0.15679600  | -0.11822900 |
| C   | 2.27720100  | 0.89401200  | 0.64247600  |
| C   | 3.66113500  | 1.03428500  | 0.71207400  |
| N   | 4.50202700  | 0.23968800  | 0.07680100  |
| C   | 4.02671500  | -0.73393900 | -0.67346300 |
| C   | 2.65813700  | -0.98637500 | -0.78897900 |
| C   | -2.27720400 | -0.89400100 | 0.64245100  |
| C   | -3.66113600 | -1.03427800 | 0.71206900  |
| N   | -4.50204000 | -0.23968400 | 0.07680900  |
| C   | -4.02674200 | 0.73394500  | -0.67346300 |
| C   | -2.65816500 | 0.98639300  | -0.78898600 |
| C   | 4.66503800  | 3.03755200  | 3.32911000  |
| N   | 3.85626800  | 2.14813900  | 2.78613600  |
| N   | 4.23737100  | 2.04554500  | 1.51442400  |
| C   | 5.32111100  | 2.86677800  | 1.23281900  |
| C   | 5.63908700  | 3.54991300  | 2.41132400  |
| N   | 6.59188000  | 4.46010000  | 2.62130500  |
| C   | 6.68131700  | -2.84357600 | -1.31160200 |
| N   | 5.90704500  | -2.13523700 | -0.51026200 |
| N   | 5.02087700  | -1.53770200 | -1.29888200 |
| C   | 5.22654700  | -1.86079700 | -2.63408200 |
| C   | 6.32373700  | -2.72569200 | -2.69195400 |
| N   | 6.89690400  | -3.27961300 | -3.76180300 |
| C   | -6.68136300 | 2.84357400  | -1.31153900 |
| N   | -5.90708100 | 2.13522300  | -0.51022100 |
| N   | -5.02092200 | 1.53770100  | -1.29886200 |
| C   | -5.22663700 | 1.86078500  | -2.63405900 |
| C   | -6.32381900 | 2.72569100  | -2.69190100 |
| N   | -6.89699200 | 3.27964300  | -3.76173000 |
| C   | -4.66500500 | -3.03757900 | 3.32909700  |
| N   | -3.85626900 | -2.14812300 | 2.78613800  |
| N   | -4.23735600 | -2.04554900 | 1.51442100  |
| C   | -5.32104600 | -2.86683800 | 1.23279500  |
| C   | -5.63909900 | -3.54999000 | 2.41129400  |
| N   | -6.59176500 | -4.46022100 | 2.62125900  |
| N   | 1.40378500  | 1.85144100  | 1.36563800  |
| O   | 1.50873100  | 3.01342000  | 1.02207400  |
| O   | 0.68887200  | 1.39798500  | 2.23376800  |
| N   | -1.40377100 | -1.85143400 | 1.36558600  |
| O   | -0.68880000 | -1.39797700 | 2.23366600  |
| O   | -1.50882100 | -3.01342900 | 1.02210800  |
| N   | 2.13694100  | -2.09828100 | -1.60767900 |
| O   | 2.77597800  | -3.13962900 | -1.57504000 |
| O   | 1.11983600  | -1.89060600 | -2.23865800 |
| N   | -2.13697300 | 2.09832300  | -1.60765900 |
| O   | -2.77603300 | 3.13965700  | -1.57501900 |
| O   | -1.11984300 | 1.89068300  | -2.23860800 |
| N   | 4.52489500  | 3.41667300  | 4.71603700  |
| O   | 3.66620600  | 2.88357100  | 5.38528000  |
| O   | 5.32030300  | 4.27860400  | 5.10527900  |
| N   | 5.81157600  | 3.14270600  | -0.06385800 |
| O   | 5.21180400  | 2.69717400  | -1.03439100 |
| O   | 6.82291200  | 3.85382100  | -0.11196700 |
| N   | 7.76953900  | -3.63081400 | -0.78472200 |
| O   | 7.96094200  | -3.64330100 | 0.41312000  |
| O   | 8.43231400  | -4.24156600 | -1.63086400 |

[B12]

|     |             |             |             |
|-----|-------------|-------------|-------------|
| 0 1 |             |             |             |
| N   | -0.42755300 | -0.64772900 | -0.07971300 |
| N   | 0.31661700  | 0.28977600  | -0.41903900 |
| C   | -1.80953200 | -0.36407300 | -0.11371300 |
| C   | 1.69395100  | 0.03015300  | -0.27205000 |
| C   | -2.67401900 | -1.41825000 | -0.48985500 |
| C   | -4.05133300 | -1.23171500 | -0.35080000 |
| N   | -4.53446900 | -0.07165900 | 0.06905900  |
| C   | -3.75452400 | 0.95478700  | 0.36224400  |
| C   | -2.34873400 | 0.84543900  | 0.30390300  |
| C   | 2.30185800  | -1.13059800 | 0.21592000  |
| C   | 3.69377800  | -1.20886200 | 0.24734700  |
| N   | 4.46890100  | -0.18674300 | -0.08419400 |
| C   | 3.92230900  | 0.94516300  | -0.49928200 |
| C   | 2.54136000  | 1.06980300  | -0.65073400 |
| C   | -7.08025900 | -2.52092900 | -1.02502200 |
| N   | -6.18002600 | -1.61683500 | -1.28814200 |
| N   | -5.06044500 | -2.16143000 | -0.67970200 |
| C   | -5.43911700 | -3.34717500 | -0.04137800 |
| N   | -6.71001300 | -3.59244100 | -0.29390100 |
| N   | -4.64402000 | -4.05345900 | 0.78832100  |
| C   | -4.77905400 | 3.97474700  | 1.53144600  |
| N   | -3.79762500 | 3.12386900  | 1.40592700  |
| N   | -4.42526300 | 2.10108400  | 0.73074900  |
| C   | -5.77647300 | 2.44355400  | 0.51491900  |
| N   | -5.98530400 | 3.64230800  | 1.02611000  |
| N   | -6.66525500 | 1.68990600  | -0.13332100 |
| C   | 6.55679200  | 2.81637300  | -1.53592000 |
| N   | 5.79164800  | 1.77991800  | -1.74731100 |
| N   | 4.79108400  | 2.00564400  | -0.82564900 |
| C   | 5.07567500  | 3.16380900  | -0.10920900 |
| N   | 6.18861700  | 3.69116800  | -0.57145500 |
| N   | 4.34524200  | 3.59742900  | 0.94703000  |
| C   | 5.81440900  | -3.47810700 | 1.62669400  |
| N   | 5.20309400  | -2.33004100 | 1.74263000  |
| N   | 4.33374600  | -2.39174300 | 0.67570800  |
| C   | 4.53133500  | -3.58169800 | -0.01342000 |
| N   | 5.45980900  | -4.28396100 | 0.59859100  |
| N   | 3.90522200  | -3.89403100 | -1.17646000 |
| N   | -2.08814900 | -2.55944100 | -1.18808500 |
| O   | -2.64758500 | -3.64660500 | -1.08726900 |
| O   | -1.09079500 | -2.34592400 | -1.85576100 |
| N   | 1.51102200  | -2.25217000 | 0.77098800  |
| O   | 1.30938000  | -3.20031600 | 0.02681800  |
| O   | 1.15680400  | -2.14192700 | 1.92210400  |
| N   | -1.45025800 | 1.98849100  | 0.61910300  |
| O   | -0.81274000 | 1.91078000  | 1.64951600  |
| O   | -1.42360800 | 2.86809400  | -0.21250600 |
| N   | 1.94573600  | 2.27370500  | -1.27245800 |
| O   | 1.59871400  | 2.16481100  | -2.42587200 |
| O   | 1.86340000  | 3.26617700  | -0.56555300 |
| N   | -8.45589300 | -2.34044400 | -1.51425400 |
| O   | -9.14105500 | -3.34008200 | -1.59693500 |
| O   | -8.78585700 | -1.19614000 | -1.78674600 |
| N   | -4.55512100 | 5.25848700  | 2.22264300  |
| O   | -5.49337500 | 6.03228900  | 2.23927100  |
| O   | -3.45201500 | 5.42643000  | 2.71115600  |
| N   | 7.77439500  | 3.01534400  | -2.33928500 |
| O   | 8.50505100  | 3.92603400  | -1.99534400 |
| O   | 7.94516900  | 2.24994400  | -3.27197600 |

---

|   |             |             |             |   |             |             |             |
|---|-------------|-------------|-------------|---|-------------|-------------|-------------|
| N | 4.50869200  | -1.31501800 | -3.71046200 | N | 6.84584700  | -3.87235200 | 2.60026500  |
| O | 3.60152600  | -0.51903400 | -3.46270000 | O | 7.45407100  | -4.89818300 | 2.35608900  |
| O | 4.84771800  | -1.67817200 | -4.84030400 | O | 7.00143700  | -3.13764100 | 3.55963100  |
| N | -7.76958200 | 3.63080200  | -0.78463300 | H | -3.67468000 | -4.13729400 | 0.51169600  |
| O | -7.96095300 | 3.64329500  | 0.41321500  | H | -5.07527700 | -4.90062400 | 1.13010600  |
| O | -8.43241100 | 4.24151200  | -1.63076500 | H | -6.45544900 | 0.74703500  | -0.43160900 |
| N | -4.50885700 | 1.31495600  | -3.71046400 | H | -7.58507000 | 2.07658600  | -0.27262600 |
| O | -3.60145500 | 0.51923800  | -3.46271300 | H | 3.33864700  | 3.52047700  | 0.87451100  |
| O | -4.84763700 | 1.67843800  | -4.84027400 | H | 4.67143300  | 4.47788600  | 1.31931200  |
| N | -4.52486800 | -3.41669600 | 4.71602600  | H | 2.92253900  | -3.66272500 | -1.24546000 |
| O | -3.66620900 | -2.88356000 | 5.38528400  | H | 4.14023700  | -4.81634800 | -1.51453900 |
| O | -5.32022300 | -4.27868500 | 5.10524600  |   |             |             |             |
| N | -5.81148300 | -3.14277400 | -0.06389000 |   |             |             |             |
| O | -5.21173100 | -2.69718300 | -1.03440900 |   |             |             |             |
| O | -6.82277600 | -3.85394900 | -0.11202100 |   |             |             |             |
| H | 7.18480300  | 4.72116000  | 1.84816400  |   |             |             |             |
| H | 6.63230200  | 4.91139300  | 3.52194900  |   |             |             |             |
| H | 6.51771600  | -3.07435900 | -4.67342200 |   |             |             |             |
| H | 7.70081000  | -3.87137400 | -3.62049300 |   |             |             |             |
| H | -6.51789700 | 3.07430000  | -4.67336900 |   |             |             |             |
| H | -7.70096300 | 3.87131200  | -3.62040900 |   |             |             |             |
| H | -7.18464800 | -4.72132300 | 1.84810200  |   |             |             |             |
| H | -6.63217000 | -4.91152800 | 3.52189600  |   |             |             |             |

---



**Table S3.** The specific data of bond order for all designed compounds

| A1                             |     |       |                 | A2                             |     |       |                 |
|--------------------------------|-----|-------|-----------------|--------------------------------|-----|-------|-----------------|
| The bond order $\geq$ 0.050000 |     |       |                 | The bond order $\geq$ 0.050000 |     |       |                 |
| #                              | 1:  | 1(N)  | 2(N): 1.435992  | #                              | 1:  | 1(N)  | 2(N): 1.433785  |
| #                              | 2:  | 1(N)  | 3(C): 0.931659  | #                              | 2:  | 1(N)  | 3(C): 0.931831  |
| #                              | 3:  | 2(N)  | 4(C): 0.931634  | #                              | 3:  | 2(N)  | 4(C): 0.931843  |
| #                              | 4:  | 3(C)  | 5(C): 1.369661  | #                              | 4:  | 3(C)  | 5(C): 1.393289  |
| #                              | 5:  | 3(C)  | 9(C): 1.410072  | #                              | 5:  | 3(C)  | 9(C): 1.369963  |
| #                              | 6:  | 4(C)  | 10(C): 1.369668 | #                              | 6:  | 4(C)  | 10(C): 1.393264 |
| #                              | 7:  | 4(C)  | 14(C): 1.410092 | #                              | 7:  | 4(C)  | 14(C): 1.369957 |
| #                              | 8:  | 5(C)  | 6(C): 1.376092  | #                              | 8:  | 5(C)  | 6(C): 1.370248  |
| #                              | 9:  | 5(C)  | 19(N): 0.676061 | #                              | 9:  | 5(C)  | 21(N): 0.669566 |
| #                              | 10: | 6(C)  | 7(N): 1.181516  | #                              | 10: | 6(C)  | 7(N): 1.202321  |
| #                              | 11: | 6(C)  | 15(C): 1.256907 | #                              | 11: | 6(C)  | 15(N): 0.922941 |
| #                              | 12: | 7(N)  | 8(C): 1.235409  | #                              | 12: | 7(N)  | 8(C): 1.200353  |
| #                              | 13: | 8(C)  | 9(C): 1.469657  | #                              | 13: | 8(C)  | 9(C): 1.477924  |
| #                              | 14: | 8(C)  | 31(H): 0.854104 | #                              | 14: | 8(C)  | 33(H): 0.853763 |
| #                              | 15: | 9(C)  | 22(N): 0.694726 | #                              | 15: | 9(C)  | 24(N): 0.707046 |
| #                              | 16: | 10(C) | 11(C): 1.376109 | #                              | 16: | 10(C) | 11(C): 1.370237 |
| #                              | 17: | 10(C) | 28(N): 0.676059 | #                              | 17: | 10(C) | 30(N): 0.669568 |
| #                              | 18: | 11(C) | 12(N): 1.181508 | #                              | 18: | 11(C) | 12(N): 1.202307 |
| #                              | 19: | 11(C) | 17(C): 1.256899 | #                              | 19: | 11(C) | 18(N): 0.922964 |
| #                              | 20: | 12(N) | 13(C): 1.235422 | #                              | 20: | 12(N) | 13(C): 1.200366 |
| #                              | 21: | 13(C) | 14(C): 1.469646 | #                              | 21: | 13(C) | 14(C): 1.477918 |
| #                              | 22: | 13(C) | 32(H): 0.854100 | #                              | 22: | 13(C) | 34(H): 0.853765 |
| #                              | 23: | 14(C) | 25(N): 0.694721 | #                              | 23: | 14(C) | 27(N): 0.707061 |
| #                              | 24: | 15(C) | 16(N): 2.536295 | #                              | 24: | 15(N) | 16(N): 1.129553 |
| #                              | 25: | 17(C) | 18(N): 2.536289 | #                              | 25: | 16(N) | 17(N): 2.255729 |
| #                              | 26: | 19(N) | 20(O): 0.999048 | #                              | 26: | 18(N) | 19(N): 1.129545 |
| #                              | 27: | 19(N) | 21(O): 0.986694 | #                              | 27: | 19(N) | 20(N): 2.255736 |
| #                              | 28: | 22(N) | 23(O): 0.969806 | #                              | 28: | 21(N) | 22(O): 1.001757 |
| #                              | 29: | 22(N) | 24(O): 0.969011 | #                              | 29: | 21(N) | 23(O): 0.981808 |
| #                              | 30: | 25(N) | 26(O): 0.969829 | #                              | 30: | 24(N) | 25(O): 0.948798 |
| #                              | 31: | 25(N) | 27(O): 0.969106 | #                              | 31: | 24(N) | 26(O): 0.958205 |
| #                              | 32: | 28(N) | 29(O): 0.986750 | #                              | 32: | 27(N) | 28(O): 0.948809 |
| #                              | 33: | 28(N) | 30(O): 0.999088 | #                              | 33: | 27(N) | 29(O): 0.958190 |
|                                |     |       |                 | #                              | 34: | 30(N) | 31(O): 0.981792 |
|                                |     |       |                 | #                              | 35: | 30(N) | 32(O): 1.001755 |
| #                              | 17: | 10(C) | 28(N): 0.676059 |                                |     |       |                 |
|                                |     |       |                 | #                              | 9:  | 5(C)  | 21(N): 0.669566 |
| A3                             |     |       |                 | A4                             |     |       |                 |
| The bond order $\geq$ 0.050000 |     |       |                 | The bond order $\geq$ 0.050000 |     |       |                 |
| #                              | 1:  | 1(N)  | 2(N): 1.451800  | #                              | 1:  | 1(N)  | 2(N): 1.450038  |

|                            |     |       |        |          |                            |     |       |        |          |
|----------------------------|-----|-------|--------|----------|----------------------------|-----|-------|--------|----------|
| #                          | 2:  | 1(N)  | 3(C):  | 0.909725 | #                          | 2:  | 1(N)  | 3(C):  | 0.916689 |
| #                          | 3:  | 2(N)  | 4(C):  | 0.922133 | #                          | 3:  | 2(N)  | 4(C):  | 0.916693 |
| #                          | 4:  | 3(C)  | 5(C):  | 1.372403 | #                          | 4:  | 3(C)  | 5(C):  | 1.365069 |
| #                          | 5:  | 3(C)  | 9(C):  | 1.366314 | #                          | 5:  | 3(C)  | 9(C):  | 1.377648 |
| #                          | 6:  | 4(C)  | 10(C): | 1.373823 | #                          | 6:  | 4(C)  | 10(C): | 1.365269 |
| #                          | 7:  | 4(C)  | 14(C): | 1.391631 | #                          | 7:  | 4(C)  | 14(C): | 1.377579 |
| #                          | 8:  | 5(C)  | 6(C):  | 1.364136 | #                          | 8:  | 5(C)  | 6(C):  | 1.285230 |
| #                          | 9:  | 5(C)  | 21(N): | 0.657592 | #                          | 9:  | 5(C)  | 17(N): | 0.687387 |
| #                          | 10: | 6(C)  | 7(N):  | 1.278487 | #                          | 10: | 6(C)  | 7(N):  | 1.139389 |
| #                          | 11: | 6(C)  | 15(N): | 0.870213 | #                          | 11: | 6(C)  | 15(N): | 1.163596 |
| #                          | 12: | 7(N)  | 8(C):  | 1.193591 | #                          | 12: | 7(N)  | 8(C):  | 1.258812 |
| #                          | 13: | 8(C)  | 9(C):  | 1.486765 | #                          | 13: | 8(C)  | 9(C):  | 1.443163 |
| #                          | 14: | 8(C)  | 33(H): | 0.853479 | #                          | 14: | 8(C)  | 29(H): | 0.850743 |
| #                          | 15: | 9(C)  | 24(N): | 0.687955 | #                          | 15: | 9(C)  | 20(N): | 0.714729 |
| #                          | 16: | 10(C) | 11(C): | 1.361827 | #                          | 16: | 10(C) | 11(C): | 1.285399 |
| #                          | 17: | 10(C) | 30(N): | 0.666991 | #                          | 17: | 10(C) | 26(N): | 0.687218 |
| #                          | 18: | 11(C) | 12(N): | 1.284135 | #                          | 18: | 11(C) | 12(N): | 1.139581 |
| #                          | 19: | 11(C) | 18(N): | 0.868045 | #                          | 19: | 11(C) | 16(N): | 1.163155 |
| #                          | 20: | 12(N) | 13(C): | 1.191912 | #                          | 20: | 12(N) | 13(C): | 1.258599 |
| #                          | 21: | 13(C) | 14(C): | 1.492669 | #                          | 21: | 13(C) | 14(C): | 1.443354 |
| #                          | 22: | 13(C) | 34(H): | 0.852723 | #                          | 22: | 13(C) | 30(H): | 0.850711 |
| #                          | 23: | 14(C) | 27(N): | 0.697173 | #                          | 23: | 14(C) | 23(N): | 0.714667 |
| #                          | 24: | 15(N) | 16(F): | 0.172805 | #                          | 24: | 15(N) | 31(H): | 0.680217 |
| #                          | 25: | 15(N) | 17(F): | 0.137554 | #                          | 25: | 15(N) | 32(H): | 0.677012 |
| #                          | 26: | 18(N) | 19(F): | 0.174206 | #                          | 26: | 16(N) | 33(H): | 0.680195 |
| #                          | 27: | 18(N) | 20(F): | 0.137272 | #                          | 27: | 16(N) | 34(H): | 0.677128 |
| #                          | 28: | 21(N) | 22(O): | 0.983067 | #                          | 28: | 17(N) | 18(O): | 0.903864 |
| #                          | 29: | 21(N) | 23(O): | 0.993098 | #                          | 29: | 17(N) | 19(O): | 1.003637 |
| #                          | 30: | 24(N) | 25(O): | 0.968509 | #                          | 30: | 20(N) | 21(O): | 0.936992 |
| #                          | 31: | 24(N) | 26(O): | 0.959524 | #                          | 31: | 20(N) | 22(O): | 0.951051 |
| #                          | 32: | 27(N) | 28(O): | 0.957974 | #                          | 32: | 23(N) | 24(O): | 0.936966 |
| #                          | 33: | 27(N) | 29(O): | 0.969758 | #                          | 33: | 23(N) | 25(O): | 0.951254 |
| #                          | 34: | 30(N) | 31(O): | 0.985177 | #                          | 34: | 26(N) | 27(O): | 1.003769 |
| #                          | 35: | 30(N) | 32(O): | 1.003272 | #                          | 35: | 26(N) | 28(O): | 0.903867 |
| #                          | 27: | 18(N) | 20(F): | 0.137272 | #                          | 25: | 15(N) | 32(H): | 0.677012 |
| A5                         |     |       |        |          | A6                         |     |       |        |          |
| The bond order >= 0.050000 |     |       |        |          | The bond order >= 0.050000 |     |       |        |          |
| #                          | 1:  | 1(N)  | 2(N):  | 1.431017 | #                          | 1:  | 1(N)  | 2(N):  | 1.443614 |
| #                          | 2:  | 1(N)  | 3(C):  | 0.918927 | #                          | 2:  | 1(N)  | 3(C):  | 0.920124 |
| #                          | 3:  | 2(N)  | 4(C):  | 0.918961 | #                          | 3:  | 2(N)  | 4(C):  | 0.920109 |
| #                          | 4:  | 3(C)  | 5(C):  | 1.357790 | #                          | 4:  | 3(C)  | 5(C):  | 1.381285 |
| #                          | 5:  | 3(C)  | 9(C):  | 1.400666 | #                          | 5:  | 3(C)  | 9(C):  | 1.362902 |
| #                          | 6:  | 4(C)  | 10(C): | 1.357758 | #                          | 6:  | 4(C)  | 10(C): | 1.381157 |

|                            |       |        |          |                            |       |        |          |
|----------------------------|-------|--------|----------|----------------------------|-------|--------|----------|
| # 7:                       | 4(C)  | 14(C): | 1.400585 | # 7:                       | 4(C)  | 14(C): | 1.362947 |
| # 8:                       | 5(C)  | 6(C):  | 1.315583 | # 8:                       | 5(C)  | 6(C):  | 1.257529 |
| # 9:                       | 5(C)  | 23(N): | 0.681059 | # 9:                       | 5(C)  | 19(N): | 0.684104 |
| # 10:                      | 6(C)  | 7(N):  | 1.220290 | # 10:                      | 6(C)  | 7(N):  | 1.145817 |
| # 11:                      | 6(C)  | 15(N): | 0.955249 | # 11:                      | 6(C)  | 15(N): | 1.116853 |
| # 12:                      | 7(N)  | 8(C):  | 1.235218 | # 12:                      | 7(N)  | 8(C):  | 1.236206 |
| # 13:                      | 8(C)  | 9(C):  | 1.463826 | # 13:                      | 8(C)  | 9(C):  | 1.459897 |
| # 14:                      | 8(C)  | 35(H): | 0.854038 | # 14:                      | 8(C)  | 31(H): | 0.853906 |
| # 15:                      | 9(C)  | 26(N): | 0.698143 | # 15:                      | 9(C)  | 22(N): | 0.716741 |
| # 16:                      | 10(C) | 11(C): | 1.315385 | # 16:                      | 10(C) | 11(C): | 1.257441 |
| # 17:                      | 10(C) | 32(N): | 0.681083 | # 17:                      | 10(C) | 28(N): | 0.684150 |
| # 18:                      | 11(C) | 12(N): | 1.220228 | # 18:                      | 11(C) | 12(N): | 1.145748 |
| # 19:                      | 11(C) | 19(N): | 0.955435 | # 19:                      | 11(C) | 17(N): | 1.116957 |
| # 20:                      | 12(N) | 13(C): | 1.235258 | # 20:                      | 12(N) | 13(C): | 1.236315 |
| # 21:                      | 13(C) | 14(C): | 1.463836 | # 21:                      | 13(C) | 14(C): | 1.459844 |
| # 22:                      | 13(C) | 36(H): | 0.854033 | # 22:                      | 13(C) | 32(H): | 0.853887 |
| # 23:                      | 14(C) | 29(N): | 0.698146 | # 23:                      | 14(C) | 25(N): | 0.716741 |
| # 24:                      | 15(N) | 16(N): | 0.569774 | # 24:                      | 15(N) | 16(N): | 0.610011 |
| # 25:                      | 15(N) | 37(H): | 0.656090 | # 25:                      | 15(N) | 33(H): | 0.676855 |
| # 26:                      | 16(N) | 17(O): | 0.989141 | # 26:                      | 16(N) | 34(H): | 0.692132 |
| # 27:                      | 16(N) | 18(O): | 1.033978 | # 27:                      | 16(N) | 35(H): | 0.696103 |
| # 28:                      | 19(N) | 20(N): | 0.569548 | # 28:                      | 17(N) | 18(N): | 0.610026 |
| # 29:                      | 19(N) | 38(H): | 0.655995 | # 29:                      | 17(N) | 36(H): | 0.676784 |
| # 30:                      | 20(N) | 21(O): | 0.989141 | # 30:                      | 18(N) | 37(H): | 0.692069 |
| # 31:                      | 20(N) | 22(O): | 1.033968 | # 31:                      | 18(N) | 38(H): | 0.696077 |
| # 32:                      | 23(N) | 24(O): | 0.920368 | # 32:                      | 19(N) | 20(O): | 0.906535 |
| # 33:                      | 23(N) | 25(O): | 1.014927 | # 33:                      | 19(N) | 21(O): | 1.006827 |
| # 34:                      | 26(N) | 27(O): | 0.961579 | # 34:                      | 22(N) | 23(O): | 0.937508 |
| # 35:                      | 26(N) | 28(O): | 0.963760 | # 35:                      | 22(N) | 24(O): | 0.951166 |
| # 36:                      | 29(N) | 30(O): | 0.961536 | # 36:                      | 25(N) | 26(O): | 0.937505 |
| # 37:                      | 29(N) | 31(O): | 0.963630 | # 37:                      | 25(N) | 27(O): | 0.951188 |
| # 38:                      | 32(N) | 33(O): | 1.014848 | # 38:                      | 28(N) | 29(O): | 1.006809 |
| # 39:                      | 32(N) | 34(O): | 0.920302 | # 39:                      | 28(N) | 30(O): | 0.906531 |
| # 28:                      | 19(N) | 20(N): | 0.569548 | # 24:                      | 15(N) | 16(N): | 0.610011 |
| A7                         |       |        |          | A8                         |       |        |          |
| The bond order >= 0.050000 |       |        |          | The bond order >= 0.050000 |       |        |          |
| # 1:                       | 1(N)  | 2(N):  | 1.445170 | # 1:                       | 1(N)  | 2(N):  | 1.455527 |
| # 2:                       | 1(N)  | 3(C):  | 0.932417 | # 2:                       | 1(N)  | 3(C):  | 0.916896 |
| # 3:                       | 2(N)  | 4(C):  | 0.932332 | # 3:                       | 2(N)  | 4(C):  | 0.916891 |
| # 4:                       | 3(C)  | 5(C):  | 1.350126 | # 4:                       | 3(C)  | 5(C):  | 1.356549 |
| # 5:                       | 3(C)  | 9(C):  | 1.412862 | # 5:                       | 3(C)  | 9(C):  | 1.406590 |
| # 6:                       | 4(C)  | 10(C): | 1.350070 | # 6:                       | 4(C)  | 10(C): | 1.356528 |
| # 7:                       | 4(C)  | 14(C): | 1.412922 | # 7:                       | 4(C)  | 14(C): | 1.406568 |

|       |       |        |          |       |       |        |          |
|-------|-------|--------|----------|-------|-------|--------|----------|
| # 8:  | 5(C)  | 6(C):  | 1.392307 | # 8:  | 5(C)  | 6(C):  | 1.356465 |
| # 9:  | 5(C)  | 29(N): | 0.678386 | # 9:  | 5(C)  | 35(N): | 0.677518 |
| # 10: | 6(C)  | 7(N):  | 1.208959 | # 10: | 6(C)  | 7(N):  | 1.208259 |
| # 11: | 6(C)  | 15(C): | 1.043793 | # 11: | 6(C)  | 15(C): | 1.004239 |
| # 12: | 7(N)  | 8(C):  | 1.227169 | # 12: | 7(N)  | 8(C):  | 1.219923 |
| # 13: | 8(C)  | 9(C):  | 1.472152 | # 13: | 8(C)  | 9(C):  | 1.493808 |
| # 14: | 8(C)  | 41(H): | 0.853754 | # 14: | 8(C)  | 47(H): | 0.855092 |
| # 15: | 9(C)  | 32(N): | 0.686197 | # 15: | 9(C)  | 38(N): | 0.689686 |
| # 16: | 10(C) | 11(C): | 1.392335 | # 16: | 10(C) | 11(C): | 1.356427 |
| # 17: | 10(C) | 38(N): | 0.678385 | # 17: | 10(C) | 44(N): | 0.677527 |
| # 18: | 11(C) | 12(N): | 1.208927 | # 18: | 11(C) | 12(N): | 1.208278 |
| # 19: | 11(C) | 22(C): | 1.043794 | # 19: | 11(C) | 25(C): | 1.004231 |
| # 20: | 12(N) | 13(C): | 1.227182 | # 20: | 12(N) | 13(C): | 1.219916 |
| # 21: | 13(C) | 14(C): | 1.472100 | # 21: | 13(C) | 14(C): | 1.493808 |
| # 22: | 13(C) | 42(H): | 0.853750 | # 22: | 13(C) | 48(H): | 0.855106 |
| # 23: | 14(C) | 35(N): | 0.686184 | # 23: | 14(C) | 41(N): | 0.689697 |
| # 24: | 15(C) | 16(N): | 0.539343 | # 24: | 15(C) | 16(N): | 0.525784 |
| # 25: | 15(C) | 19(N): | 0.544332 | # 25: | 15(C) | 19(N): | 0.460026 |
| # 26: | 15(C) | 43(H): | 0.833264 | # 26: | 15(C) | 22(N): | 0.457366 |
| # 27: | 16(N) | 17(O): | 0.999667 | # 27: | 16(N) | 17(O): | 0.978970 |
| # 28: | 16(N) | 18(O): | 1.011059 | # 28: | 16(N) | 18(O): | 1.043573 |
| # 29: | 19(N) | 20(O): | 0.984811 | # 29: | 19(N) | 20(O): | 1.001090 |
| # 30: | 19(N) | 21(O): | 1.035391 | # 30: | 19(N) | 21(O): | 1.059882 |
| # 31: | 22(C) | 23(N): | 0.539326 | # 31: | 22(N) | 23(O): | 1.047508 |
| # 32: | 22(C) | 26(N): | 0.544358 | # 32: | 22(N) | 24(O): | 1.027488 |
| # 33: | 22(C) | 44(H): | 0.833258 | # 33: | 25(C) | 26(N): | 0.525769 |
| # 34: | 23(N) | 24(O): | 0.999666 | # 34: | 25(C) | 29(N): | 0.460108 |
| # 35: | 23(N) | 25(O): | 1.011045 | # 35: | 25(C) | 32(N): | 0.457311 |
| # 36: | 26(N) | 27(O): | 0.984812 | # 36: | 26(N) | 27(O): | 0.978933 |
| # 37: | 26(N) | 28(O): | 1.035389 | # 37: | 26(N) | 28(O): | 1.043552 |
| # 38: | 29(N) | 30(O): | 0.951933 | # 38: | 29(N) | 30(O): | 1.001108 |
| # 39: | 29(N) | 31(O): | 0.998961 | # 39: | 29(N) | 31(O): | 1.059894 |
| # 40: | 32(N) | 33(O): | 0.970471 | # 40: | 32(N) | 33(O): | 1.047496 |
| # 41: | 32(N) | 34(O): | 0.969807 | # 41: | 32(N) | 34(O): | 1.027508 |
| # 42: | 35(N) | 36(O): | 0.970359 | # 42: | 35(N) | 36(O): | 0.946419 |
| # 43: | 35(N) | 37(O): | 0.969946 | # 43: | 35(N) | 37(O): | 1.027890 |
| # 44: | 38(N) | 39(O): | 0.999147 | # 44: | 38(N) | 39(O): | 0.976203 |
| # 45: | 38(N) | 40(O): | 0.951974 | # 45: | 38(N) | 40(O): | 0.975395 |
|       |       |        |          | # 46: | 41(N) | 42(O): | 0.976210 |
|       |       |        |          | # 47: | 41(N) | 43(O): | 0.975368 |
| # 31: | 22(C) | 23(N): | 0.539326 | # 48: | 44(N) | 45(O): | 1.027850 |
|       |       |        |          | # 49: | 44(N) | 46(O): | 0.946418 |
|       |       |        |          | # 35: | 25(C) | 32(N): | 0.457311 |

A9

A10

| The bond order >= 0.050000 |     |       |                 | The bond order >= 0.050000 |     |       |                 |
|----------------------------|-----|-------|-----------------|----------------------------|-----|-------|-----------------|
| #                          | 1:  | 1(N)  | 2(N): 1.441145  | #                          | 1:  | 1(N)  | 2(N): 1.448633  |
| #                          | 2:  | 1(N)  | 3(C): 0.933444  | #                          | 2:  | 1(N)  | 3(C): 0.917237  |
| #                          | 3:  | 2(N)  | 4(C): 0.933474  | #                          | 3:  | 2(N)  | 4(C): 0.915558  |
| #                          | 4:  | 3(C)  | 5(C): 1.357322  | #                          | 4:  | 3(C)  | 5(C): 1.374541  |
| #                          | 5:  | 3(C)  | 9(C): 1.406011  | #                          | 5:  | 3(C)  | 9(C): 1.382316  |
| #                          | 6:  | 4(C)  | 10(C): 1.357334 | #                          | 6:  | 4(C)  | 10(C): 1.374756 |
| #                          | 7:  | 4(C)  | 14(C): 1.405994 | #                          | 7:  | 4(C)  | 14(C): 1.382095 |
| #                          | 8:  | 5(C)  | 6(C): 1.424333  | #                          | 8:  | 5(C)  | 6(C): 1.342194  |
| #                          | 9:  | 5(C)  | 25(N): 0.674178 | #                          | 9:  | 5(C)  | 27(N): 0.658330 |
| #                          | 10: | 6(C)  | 7(N): 1.287324  | #                          | 10: | 6(C)  | 7(N): 1.205285  |
| #                          | 11: | 6(C)  | 17(N): 0.770972 | #                          | 11: | 6(C)  | 17(N): 0.903439 |
| #                          | 12: | 7(N)  | 8(C): 1.197860  | #                          | 12: | 7(N)  | 8(C): 1.183823  |
| #                          | 13: | 8(C)  | 9(C): 1.477578  | #                          | 13: | 8(C)  | 9(C): 1.503623  |
| #                          | 14: | 8(C)  | 55(H): 0.853964 | #                          | 14: | 8(C)  | 51(H): 0.854448 |
| #                          | 15: | 9(C)  | 28(N): 0.690918 | #                          | 15: | 9(C)  | 30(N): 0.701427 |
| #                          | 16: | 10(C) | 11(C): 1.424320 | #                          | 16: | 10(C) | 11(C): 1.339318 |
| #                          | 17: | 10(C) | 34(N): 0.674182 | #                          | 17: | 10(C) | 36(N): 0.656969 |
| #                          | 18: | 11(C) | 12(N): 1.287343 | #                          | 18: | 11(C) | 12(N): 1.204053 |
| #                          | 19: | 11(C) | 22(N): 0.770979 | #                          | 19: | 11(C) | 23(N): 0.904502 |
| #                          | 20: | 12(N) | 13(C): 1.197848 | #                          | 20: | 12(N) | 13(C): 1.183567 |
| #                          | 21: | 13(C) | 14(C): 1.477594 | #                          | 21: | 13(C) | 14(C): 1.504462 |
| #                          | 22: | 13(C) | 56(H): 0.853975 | #                          | 22: | 13(C) | 52(H): 0.854815 |
| #                          | 23: | 14(C) | 31(N): 0.690916 | #                          | 23: | 14(C) | 33(N): 0.702773 |
| #                          | 24: | 15(C) | 16(N): 1.305302 | #                          | 24: | 15(C) | 16(N): 1.421387 |
| #                          | 25: | 15(C) | 19(C): 1.275639 | #                          | 25: | 15(C) | 19(C): 1.228763 |
| #                          | 26: | 15(C) | 37(N): 0.761978 | #                          | 26: | 15(C) | 39(N): 0.745632 |
| #                          | 27: | 16(N) | 17(N): 0.799940 | #                          | 27: | 16(N) | 17(N): 0.623670 |
| #                          | 28: | 17(N) | 18(C): 0.937279 | #                          | 28: | 17(N) | 18(C): 0.878308 |
| #                          | 29: | 18(C) | 19(C): 1.438278 | #                          | 29: | 18(C) | 19(C): 1.355949 |
| #                          | 30: | 18(C) | 40(N): 0.805649 | #                          | 30: | 18(C) | 20(N): 1.208018 |
| #                          | 31: | 19(C) | 43(N): 0.734640 | #                          | 31: | 19(C) | 42(N): 0.860199 |
| #                          | 32: | 20(C) | 21(N): 1.305299 | #                          | 32: | 20(N) | 53(H): 0.667357 |
| #                          | 33: | 20(C) | 24(C): 1.275637 | #                          | 33: | 20(N) | 54(H): 0.659989 |
| #                          | 34: | 20(C) | 46(N): 0.761981 | #                          | 34: | 21(C) | 22(N): 1.423730 |
| #                          | 35: | 21(N) | 22(N): 0.799939 | #                          | 35: | 21(C) | 25(C): 1.229870 |
| #                          | 36: | 22(N) | 23(C): 0.937306 | #                          | 36: | 21(C) | 45(N): 0.743918 |
| #                          | 37: | 23(C) | 24(C): 1.438276 | #                          | 37: | 22(N) | 23(N): 0.613887 |
| #                          | 38: | 23(C) | 49(N): 0.805663 | #                          | 38: | 23(N) | 24(C): 0.877353 |
| #                          | 39: | 24(C) | 52(N): 0.734641 | #                          | 39: | 24(C) | 25(C): 1.354760 |
| #                          | 40: | 25(N) | 26(O): 0.980627 | #                          | 40: | 24(C) | 26(N): 1.211329 |
| #                          | 41: | 25(N) | 27(O): 1.006775 | #                          | 41: | 25(C) | 48(N): 0.867711 |
| #                          | 42: | 28(N) | 29(O): 0.971521 | #                          | 42: | 26(N) | 55(H): 0.665695 |
| #                          | 43: | 28(N) | 30(O): 0.975022 | #                          | 43: | 26(N) | 56(H): 0.659358 |
| #                          | 44: | 31(N) | 32(O): 0.971517 | #                          | 44: | 27(N) | 28(O): 1.000088 |

|                            |       |       |            |                            |       |       |            |
|----------------------------|-------|-------|------------|----------------------------|-------|-------|------------|
| # 45:                      | 31(N) | 33(O) | : 0.974985 | # 45:                      | 27(N) | 29(O) | : 1.011718 |
| # 46:                      | 34(N) | 35(O) | : 1.006755 | # 46:                      | 30(N) | 31(O) | : 0.956094 |
| # 47:                      | 34(N) | 36(O) | : 0.980631 | # 47:                      | 30(N) | 32(O) | : 0.964356 |
| # 48:                      | 37(N) | 38(O) | : 1.001490 | # 48:                      | 33(N) | 34(O) | : 0.955322 |
| # 49:                      | 37(N) | 39(O) | : 0.953085 | # 49:                      | 33(N) | 35(O) | : 0.964983 |
| # 50:                      | 40(N) | 41(O) | : 0.949179 | # 50:                      | 36(N) | 37(O) | : 1.011066 |
| # 51:                      | 40(N) | 42(O) | : 0.979100 | # 51:                      | 36(N) | 38(O) | : 1.001687 |
| # 52:                      | 43(N) | 44(O) | : 1.005368 | # 52:                      | 39(N) | 40(O) | : 0.991163 |
| # 53:                      | 43(N) | 45(O) | : 1.012600 | # 53:                      | 39(N) | 41(O) | : 0.989692 |
| # 54:                      | 46(N) | 47(O) | : 1.001493 | # 54:                      | 42(N) | 43(O) | : 0.855229 |
| # 55:                      | 46(N) | 48(O) | : 0.953085 | # 55:                      | 42(N) | 44(O) | : 0.967409 |
| # 56:                      | 49(N) | 50(O) | : 0.949172 | # 56:                      | 45(N) | 46(O) | : 0.997394 |
| # 57:                      | 49(N) | 51(O) | : 0.979097 | # 57:                      | 45(N) | 47(O) | : 0.992451 |
| # 58:                      | 52(N) | 53(O) | : 1.005372 | # 58:                      | 48(N) | 49(O) | : 0.961300 |
| # 59:                      | 52(N) | 54(O) | : 1.012601 | # 59:                      | 48(N) | 50(O) | : 0.854289 |
| <hr/>                      |       |       |            | <hr/>                      |       |       |            |
| # 9:                       | 5(C)  | 25(N) | : 0.674178 | # 37:                      | 22(N) | 23(N) | : 0.613887 |
| <hr/>                      |       |       |            | <hr/>                      |       |       |            |
| A11                        |       |       |            | A12                        |       |       |            |
| <hr/>                      |       |       |            | <hr/>                      |       |       |            |
| The bond order >= 0.050000 |       |       |            | The bond order >= 0.050000 |       |       |            |
| # 1:                       | 1(N)  | 2(N)  | : 1.434955 | # 1:                       | 1(N)  | 2(N)  | : 1.433901 |
| # 2:                       | 1(N)  | 3(C)  | : 0.934342 | # 2:                       | 1(N)  | 3(C)  | : 0.925211 |
| # 3:                       | 2(N)  | 4(C)  | : 0.934325 | # 3:                       | 2(N)  | 4(C)  | : 0.925213 |
| # 4:                       | 3(C)  | 5(C)  | : 1.360966 | # 4:                       | 3(C)  | 5(C)  | : 1.358574 |
| # 5:                       | 3(C)  | 9(C)  | : 1.400285 | # 5:                       | 3(C)  | 9(C)  | : 1.407724 |
| # 6:                       | 4(C)  | 10(C) | : 1.360962 | # 6:                       | 4(C)  | 10(C) | : 1.358568 |
| # 7:                       | 4(C)  | 14(C) | : 1.400296 | # 7:                       | 4(C)  | 14(C) | : 1.407712 |
| # 8:                       | 5(C)  | 6(C)  | : 1.409234 | # 8:                       | 5(C)  | 6(C)  | : 1.399530 |
| # 9:                       | 5(C)  | 27(N) | : 0.670905 | # 9:                       | 5(C)  | 27(N) | : 0.666404 |
| # 10:                      | 6(C)  | 7(N)  | : 1.273005 | # 10:                      | 6(C)  | 7(N)  | : 1.256292 |
| # 11:                      | 6(C)  | 17(N) | : 0.811083 | # 11:                      | 6(C)  | 17(N) | : 0.845521 |
| # 12:                      | 7(N)  | 8(C)  | : 1.206180 | # 12:                      | 7(N)  | 8(C)  | : 1.219015 |
| # 13:                      | 8(C)  | 9(C)  | : 1.476147 | # 13:                      | 8(C)  | 9(C)  | : 1.466036 |
| # 14:                      | 8(C)  | 51(H) | : 0.854098 | # 14:                      | 8(C)  | 45(H) | : 0.853776 |
| # 15:                      | 9(C)  | 30(N) | : 0.698070 | # 15:                      | 9(C)  | 30(N) | : 0.697431 |
| # 16:                      | 10(C) | 11(C) | : 1.409240 | # 16:                      | 10(C) | 11(C) | : 1.399539 |
| # 17:                      | 10(C) | 36(N) | : 0.670904 | # 17:                      | 10(C) | 36(N) | : 0.666393 |
| # 18:                      | 11(C) | 12(N) | : 1.272996 | # 18:                      | 11(C) | 12(N) | : 1.256292 |
| # 19:                      | 11(C) | 23(N) | : 0.811081 | # 19:                      | 11(C) | 23(N) | : 0.845524 |
| # 20:                      | 12(N) | 13(C) | : 1.206185 | # 20:                      | 12(N) | 13(C) | : 1.219007 |
| # 21:                      | 13(C) | 14(C) | : 1.476141 | # 21:                      | 13(C) | 14(C) | : 1.466042 |
| # 22:                      | 13(C) | 52(H) | : 0.854098 | # 22:                      | 13(C) | 46(H) | : 0.853776 |
| # 23:                      | 14(C) | 33(N) | : 0.698063 | # 23:                      | 14(C) | 33(N) | : 0.697433 |
| # 24:                      | 15(C) | 16(N) | : 1.289229 | # 24:                      | 15(C) | 16(N) | : 1.406403 |
| # 25:                      | 15(C) | 19(C) | : 1.216253 |                            |       |       |            |

|                            |       |       |            |                            |       |       |            |
|----------------------------|-------|-------|------------|----------------------------|-------|-------|------------|
| # 26:                      | 15(C) | 39(N) | : 0.804728 | # 25:                      | 15(C) | 19(N) | : 1.078961 |
| # 27:                      | 16(N) | 17(N) | : 0.850319 | # 26:                      | 15(C) | 39(N) | : 0.737892 |
| # 28:                      | 17(N) | 18(C) | : 0.849501 | # 27:                      | 16(N) | 17(N) | : 0.655335 |
| # 29:                      | 18(C) | 19(C) | : 1.357090 | # 28:                      | 17(N) | 18(C) | : 0.852181 |
| # 30:                      | 18(C) | 42(N) | : 0.898312 | # 29:                      | 18(C) | 19(N) | : 1.287325 |
| # 31:                      | 19(C) | 20(N) | : 1.159469 | # 30:                      | 18(C) | 20(N) | : 1.098892 |
| # 32:                      | 20(N) | 53(H) | : 0.675862 | # 31:                      | 20(N) | 47(H) | : 0.669389 |
| # 33:                      | 20(N) | 54(H) | : 0.673853 | # 32:                      | 20(N) | 48(H) | : 0.677619 |
| # 34:                      | 21(C) | 22(N) | : 1.289227 | # 33:                      | 21(C) | 22(N) | : 1.406405 |
| # 35:                      | 21(C) | 25(C) | : 1.216253 | # 34:                      | 21(C) | 25(N) | : 1.078964 |
| # 36:                      | 21(C) | 45(N) | : 0.804728 | # 35:                      | 21(C) | 42(N) | : 0.737897 |
| # 37:                      | 22(N) | 23(N) | : 0.850321 | # 36:                      | 22(N) | 23(N) | : 0.655337 |
| # 38:                      | 23(N) | 24(C) | : 0.849506 | # 37:                      | 23(N) | 24(C) | : 0.852193 |
| # 39:                      | 24(C) | 25(C) | : 1.357089 | # 38:                      | 24(C) | 25(N) | : 1.287325 |
| # 40:                      | 24(C) | 48(N) | : 0.898313 | # 39:                      | 24(C) | 26(N) | : 1.098888 |
| # 41:                      | 25(C) | 26(N) | : 1.159464 | # 40:                      | 26(N) | 49(H) | : 0.669377 |
| # 42:                      | 26(N) | 55(H) | : 0.675865 | # 41:                      | 26(N) | 50(H) | : 0.677617 |
| # 43:                      | 26(N) | 56(H) | : 0.673855 | # 42:                      | 27(N) | 28(O) | : 1.038469 |
| # 44:                      | 27(N) | 28(O) | : 0.976710 | # 43:                      | 27(N) | 29(O) | : 0.919390 |
| # 45:                      | 27(N) | 29(O) | : 1.006438 | # 44:                      | 30(N) | 31(O) | : 0.970817 |
| # 46:                      | 30(N) | 31(O) | : 0.960397 | # 45:                      | 30(N) | 32(O) | : 0.967212 |
| # 47:                      | 30(N) | 32(O) | : 0.973416 | # 46:                      | 33(N) | 34(O) | : 0.970808 |
| # 48:                      | 33(N) | 34(O) | : 0.960394 | # 47:                      | 33(N) | 35(O) | : 0.967204 |
| # 49:                      | 33(N) | 35(O) | : 0.973439 | # 48:                      | 36(N) | 37(O) | : 0.919371 |
| # 50:                      | 36(N) | 37(O) | : 1.006428 | # 49:                      | 36(N) | 38(O) | : 1.038436 |
| # 51:                      | 36(N) | 38(O) | : 0.976720 | # 50:                      | 39(N) | 40(O) | : 0.972784 |
| # 52:                      | 39(N) | 40(O) | : 1.001962 | # 51:                      | 39(N) | 41(O) | : 0.969235 |
| # 53:                      | 39(N) | 41(O) | : 0.878949 | # 52:                      | 42(N) | 43(O) | : 0.972786 |
| # 54:                      | 42(N) | 43(O) | : 0.926672 | # 53:                      | 42(N) | 44(O) | : 0.969220 |
| # 55:                      | 42(N) | 44(O) | : 0.870806 |                            |       |       |            |
| # 56:                      | 45(N) | 46(O) | : 1.001964 |                            |       |       |            |
| # 57:                      | 45(N) | 47(O) | : 0.878950 | # 27:                      | 16(N) | 17(N) | : 0.655335 |
| # 58:                      | 48(N) | 49(O) | : 0.926671 |                            |       |       |            |
| # 59:                      | 48(N) | 50(O) | : 0.870800 |                            |       |       |            |
| # 17:                      | 10(C) | 36(N) | : 0.670904 |                            |       |       |            |
| <b>B1</b>                  |       |       |            | <b>B2</b>                  |       |       |            |
| The bond order >= 0.050000 |       |       |            | The bond order >= 0.050000 |       |       |            |
| # 1:                       | 1(N)  | 2(N)  | : 1.434088 | # 1:                       | 1(N)  | 2(N)  | : 1.441534 |
| # 2:                       | 1(N)  | 3(C)  | : 0.928649 | # 2:                       | 1(N)  | 3(C)  | : 0.921804 |
| # 3:                       | 2(N)  | 4(C)  | : 0.928614 | # 3:                       | 2(N)  | 4(C)  | : 0.928238 |
| # 4:                       | 3(C)  | 5(C)  | : 1.377553 | # 4:                       | 3(C)  | 5(C)  | : 1.372777 |
| # 5:                       | 3(C)  | 9(C)  | : 1.420188 | # 5:                       | 3(C)  | 9(C)  | : 1.401054 |
| # 6:                       | 4(C)  | 10(C) | : 1.377486 | # 6:                       | 4(C)  | 10(C) | : 1.402102 |

|                            |       |        |          |                            |       |        |          |
|----------------------------|-------|--------|----------|----------------------------|-------|--------|----------|
| # 7:                       | 4(C)  | 14(C): | 1.420267 | # 7:                       | 4(C)  | 14(C): | 1.354201 |
| # 8:                       | 5(C)  | 6(C):  | 1.376462 | # 8:                       | 5(C)  | 6(C):  | 1.385534 |
| # 9:                       | 5(C)  | 15(N): | 0.686632 | # 9:                       | 5(C)  | 15(N): | 0.677386 |
| # 10:                      | 6(C)  | 7(N):  | 1.194480 | # 10:                      | 6(C)  | 7(N):  | 1.175107 |
| # 11:                      | 6(C)  | 29(C): | 1.257036 | # 11:                      | 6(C)  | 30(N): | 0.911940 |
| # 12:                      | 7(N)  | 8(C):  | 1.187270 | # 12:                      | 7(N)  | 8(C):  | 1.172232 |
| # 13:                      | 8(C)  | 9(C):  | 1.392581 | # 13:                      | 8(C)  | 9(C):  | 1.395901 |
| # 14:                      | 8(C)  | 27(C): | 1.258694 | # 14:                      | 8(C)  | 27(N): | 0.919381 |
| # 15:                      | 9(C)  | 21(N): | 0.695103 | # 15:                      | 9(C)  | 21(N): | 0.691385 |
| # 16:                      | 10(C) | 11(C): | 1.376491 | # 16:                      | 10(C) | 11(C): | 1.365456 |
| # 17:                      | 10(C) | 18(N): | 0.686644 | # 17:                      | 10(C) | 18(N): | 0.682614 |
| # 18:                      | 11(C) | 12(N): | 1.194442 | # 18:                      | 11(C) | 12(N): | 1.224275 |
| # 19:                      | 11(C) | 31(C): | 1.257021 | # 19:                      | 11(C) | 33(N): | 0.921132 |
| # 20:                      | 12(N) | 13(C): | 1.187325 | # 20:                      | 12(N) | 13(C): | 1.186377 |
| # 21:                      | 13(C) | 14(C): | 1.392572 | # 21:                      | 13(C) | 14(C): | 1.334723 |
| # 22:                      | 13(C) | 33(C): | 1.258681 | # 22:                      | 13(C) | 36(N): | 0.901361 |
| # 23:                      | 14(C) | 24(N): | 0.695082 | # 23:                      | 14(C) | 24(N): | 0.698008 |
| # 24:                      | 15(N) | 16(O): | 1.006830 | # 24:                      | 15(N) | 16(O): | 0.997255 |
| # 25:                      | 15(N) | 17(O): | 0.985859 | # 25:                      | 15(N) | 17(O): | 0.976812 |
| # 26:                      | 18(N) | 19(O): | 0.985971 | # 26:                      | 18(N) | 19(O): | 0.969647 |
| # 27:                      | 18(N) | 20(O): | 1.006834 | # 27:                      | 18(N) | 20(O): | 0.996348 |
| # 28:                      | 21(N) | 22(O): | 0.997048 | # 28:                      | 21(N) | 22(O): | 0.983245 |
| # 29:                      | 21(N) | 23(O): | 0.978481 | # 29:                      | 21(N) | 23(O): | 0.962478 |
| # 30:                      | 24(N) | 25(O): | 0.997102 | # 30:                      | 24(N) | 25(O): | 0.938026 |
| # 31:                      | 24(N) | 26(O): | 0.978656 | # 31:                      | 24(N) | 26(O): | 0.970137 |
| # 32:                      | 27(C) | 28(N): | 2.540722 | # 32:                      | 27(N) | 28(N): | 1.133482 |
| # 33:                      | 29(C) | 30(N): | 2.541503 | # 33:                      | 28(N) | 29(N): | 2.239904 |
| # 34:                      | 31(C) | 32(N): | 2.541502 | # 34:                      | 30(N) | 31(N): | 1.136246 |
| # 35:                      | 33(C) | 34(N): | 2.540736 | # 35:                      | 31(N) | 32(N): | 2.242783 |
|                            |       |        |          | # 36:                      | 33(N) | 34(N): | 1.129308 |
| # 9:                       | 5(C)  | 15(N): | 0.686632 | # 37:                      | 34(N) | 35(N): | 2.259919 |
|                            |       |        |          | # 38:                      | 36(N) | 37(N): | 1.141414 |
|                            |       |        |          | # 39:                      | 37(N) | 38(N): | 2.210928 |
|                            |       |        |          | # 9:                       | 5(C)  | 15(N): | 0.677386 |
| <b>B3</b>                  |       |        |          | <b>B4</b>                  |       |        |          |
| The bond order >= 0.050000 |       |        |          | The bond order >= 0.050000 |       |        |          |
| # 1:                       | 1(N)  | 2(N):  | 1.416006 | # 1:                       | 1(N)  | 2(N):  | 1.458449 |
| # 2:                       | 1(N)  | 3(C):  | 0.923866 | # 2:                       | 1(N)  | 3(C):  | 0.904837 |
| # 3:                       | 2(N)  | 4(C):  | 0.927636 | # 3:                       | 2(N)  | 4(C):  | 0.904844 |
| # 4:                       | 3(C)  | 5(C):  | 1.355211 | # 4:                       | 3(C)  | 5(C):  | 1.364389 |
| # 5:                       | 3(C)  | 9(C):  | 1.394948 | # 5:                       | 3(C)  | 9(C):  | 1.363629 |
| # 6:                       | 4(C)  | 10(C): | 1.349279 | # 6:                       | 4(C)  | 10(C): | 1.364322 |
| # 7:                       | 4(C)  | 14(C): | 1.402786 | # 7:                       | 4(C)  | 14(C): | 1.363671 |



|                            |       |        |          |                            |       |        |          |
|----------------------------|-------|--------|----------|----------------------------|-------|--------|----------|
| # 8:                       | 5(C)  | 6(C):  | 1.383867 | # 8:                       | 5(C)  | 6(C):  | 1.249355 |
| # 9:                       | 5(C)  | 15(N): | 0.671474 | # 9:                       | 5(C)  | 19(N): | 0.712956 |
| # 10:                      | 6(C)  | 7(N):  | 1.254640 | # 10:                      | 6(C)  | 7(N):  | 1.182499 |
| # 11:                      | 6(C)  | 30(N): | 0.865695 | # 11:                      | 6(C)  | 16(N): | 1.157970 |
| # 12:                      | 7(N)  | 8(C):  | 1.253654 | # 12:                      | 7(N)  | 8(C):  | 1.173521 |
| # 13:                      | 8(C)  | 9(C):  | 1.410890 | # 13:                      | 8(C)  | 9(C):  | 1.268284 |
| # 14:                      | 8(C)  | 27(N): | 0.852713 | # 14:                      | 8(C)  | 15(N): | 1.170871 |
| # 15:                      | 9(C)  | 21(N): | 0.674370 | # 15:                      | 9(C)  | 25(N): | 0.745335 |
| # 16:                      | 10(C) | 11(C): | 1.393739 | # 16:                      | 10(C) | 11(C): | 1.249304 |
| # 17:                      | 10(C) | 18(N): | 0.672123 | # 17:                      | 10(C) | 22(N): | 0.713036 |
| # 18:                      | 11(C) | 12(N): | 1.242083 | # 18:                      | 11(C) | 12(N): | 1.182430 |
| # 19:                      | 11(C) | 33(N): | 0.869008 | # 19:                      | 11(C) | 17(N): | 1.158084 |
| # 20:                      | 12(N) | 13(C): | 1.247063 | # 20:                      | 12(N) | 13(C): | 1.173600 |
| # 21:                      | 13(C) | 14(C): | 1.397679 | # 21:                      | 13(C) | 14(C): | 1.268242 |
| # 22:                      | 13(C) | 36(N): | 0.878122 | # 22:                      | 13(C) | 18(N): | 1.170868 |
| # 23:                      | 14(C) | 24(N): | 0.667913 | # 23:                      | 14(C) | 28(N): | 0.745345 |
| # 24:                      | 15(N) | 16(O): | 0.999646 | # 24:                      | 15(N) | 31(H): | 0.667510 |
| # 25:                      | 15(N) | 17(O): | 1.018346 | # 25:                      | 15(N) | 32(H): | 0.684037 |
| # 26:                      | 18(N) | 19(O): | 0.993804 | # 26:                      | 16(N) | 33(H): | 0.684213 |
| # 27:                      | 18(N) | 20(O): | 1.010665 | # 27:                      | 16(N) | 34(H): | 0.672743 |
| # 28:                      | 21(N) | 22(O): | 1.008319 | # 28:                      | 17(N) | 35(H): | 0.684215 |
| # 29:                      | 21(N) | 23(O): | 1.011332 | # 29:                      | 17(N) | 36(H): | 0.672717 |
| # 30:                      | 24(N) | 25(O): | 1.018628 | # 30:                      | 18(N) | 37(H): | 0.667499 |
| # 31:                      | 24(N) | 26(O): | 0.996366 | # 31:                      | 18(N) | 38(H): | 0.684026 |
| # 32:                      | 27(N) | 28(F): | 0.148025 | # 32:                      | 19(N) | 20(O): | 0.875930 |
| # 33:                      | 27(N) | 29(F): | 0.145485 | # 33:                      | 19(N) | 21(O): | 0.996046 |
| # 34:                      | 30(N) | 31(F): | 0.177278 | # 34:                      | 22(N) | 23(O): | 0.995947 |
| # 35:                      | 30(N) | 32(F): | 0.138904 | # 35:                      | 22(N) | 24(O): | 0.875878 |
| # 36:                      | 33(N) | 34(F): | 0.175500 | # 36:                      | 25(N) | 26(O): | 0.854534 |
| # 37:                      | 33(N) | 35(F): | 0.138560 | # 37:                      | 25(N) | 27(O): | 0.950194 |
| # 38:                      | 36(N) | 37(F): | 0.141016 | # 38:                      | 28(N) | 29(O): | 0.854546 |
| # 39:                      | 36(N) | 38(F): | 0.174635 | # 39:                      | 28(N) | 30(O): | 0.950200 |
| # 37:                      | 33(N) | 35(F): | 0.138560 | # 30:                      | 18(N) | 37(H): | 0.667499 |
| <b>B5</b>                  |       |        |          | <b>B6</b>                  |       |        |          |
| The bond order >= 0.050000 |       |        |          | The bond order >= 0.050000 |       |        |          |
| # 1:                       | 1(N)  | 2(N):  | 1.453213 | # 1:                       | 1(N)  | 2(N):  | 1.449391 |
| # 2:                       | 1(N)  | 3(C):  | 0.911214 | # 2:                       | 1(N)  | 3(C):  | 0.930275 |
| # 3:                       | 2(N)  | 4(C):  | 0.911222 | # 3:                       | 2(N)  | 4(C):  | 0.884835 |
| # 4:                       | 3(C)  | 5(C):  | 1.372423 | # 4:                       | 3(C)  | 5(C):  | 1.361627 |
| # 5:                       | 3(C)  | 9(C):  | 1.377907 | # 5:                       | 3(C)  | 9(C):  | 1.344637 |
| # 6:                       | 4(C)  | 10(C): | 1.372446 | # 6:                       | 4(C)  | 10(C): | 1.311649 |
| # 7:                       | 4(C)  | 14(C): | 1.377928 | # 7:                       | 4(C)  | 14(C): | 1.440838 |

|                            |       |        |          |                            |       |        |          |
|----------------------------|-------|--------|----------|----------------------------|-------|--------|----------|
| # 8:                       | 5(C)  | 6(C):  | 1.287784 | # 8:                       | 5(C)  | 6(C):  | 1.227359 |
| # 9:                       | 5(C)  | 15(N): | 0.688881 | # 9:                       | 5(C)  | 15(N): | 0.719833 |
| # 10:                      | 6(C)  | 7(N):  | 1.232452 | # 10:                      | 6(C)  | 7(N):  | 1.161915 |
| # 11:                      | 6(C)  | 31(N): | 0.972160 | # 11:                      | 6(C)  | 29(N): | 1.133331 |
| # 12:                      | 7(N)  | 8(C):  | 1.222413 | # 12:                      | 7(N)  | 8(C):  | 1.156651 |
| # 13:                      | 8(C)  | 9(C):  | 1.301920 | # 13:                      | 8(C)  | 9(C):  | 1.243060 |
| # 14:                      | 8(C)  | 27(N): | 0.993184 | # 14:                      | 8(C)  | 27(N): | 1.135626 |
| # 15:                      | 9(C)  | 21(N): | 0.714419 | # 15:                      | 9(C)  | 21(N): | 0.765333 |
| # 16:                      | 10(C) | 11(C): | 1.287763 | # 16:                      | 10(C) | 11(C): | 1.266531 |
| # 17:                      | 10(C) | 18(N): | 0.688868 | # 17:                      | 10(C) | 18(N): | 0.735104 |
| # 18:                      | 11(C) | 12(N): | 1.232445 | # 18:                      | 11(C) | 12(N): | 1.128516 |
| # 19:                      | 11(C) | 35(N): | 0.972158 | # 19:                      | 11(C) | 31(N): | 1.101832 |
| # 20:                      | 12(N) | 13(C): | 1.222418 | # 20:                      | 12(N) | 13(C): | 1.185519 |
| # 21:                      | 13(C) | 14(C): | 1.301946 | # 21:                      | 13(C) | 14(C): | 1.309160 |
| # 22:                      | 13(C) | 39(N): | 0.993170 | # 22:                      | 13(C) | 33(N): | 1.074593 |
| # 23:                      | 14(C) | 24(N): | 0.714410 | # 23:                      | 14(C) | 24(N): | 0.659961 |
| # 24:                      | 15(N) | 16(O): | 0.914820 | # 24:                      | 15(N) | 16(O): | 0.873875 |
| # 25:                      | 15(N) | 17(O): | 1.011794 | # 25:                      | 15(N) | 17(O): | 0.985396 |
| # 26:                      | 18(N) | 19(O): | 1.011803 | # 26:                      | 18(N) | 19(O): | 0.980804 |
| # 27:                      | 18(N) | 20(O): | 0.914829 | # 27:                      | 18(N) | 20(O): | 0.867632 |
| # 28:                      | 21(N) | 22(O): | 0.896810 | # 28:                      | 21(N) | 22(O): | 0.854546 |
| # 29:                      | 21(N) | 23(O): | 0.982720 | # 29:                      | 21(N) | 23(O): | 0.933903 |
| # 30:                      | 24(N) | 25(O): | 0.896805 | # 30:                      | 24(N) | 25(O): | 1.003151 |
| # 31:                      | 24(N) | 26(O): | 0.982734 | # 31:                      | 24(N) | 26(O): | 0.962450 |
| # 32:                      | 27(N) | 28(N): | 0.545837 | # 32:                      | 27(N) | 28(N): | 0.619149 |
| # 33:                      | 27(N) | 43(H): | 0.647109 | # 33:                      | 27(N) | 35(H): | 0.661898 |
| # 34:                      | 28(N) | 29(O): | 0.992197 | # 34:                      | 28(N) | 36(H): | 0.693199 |
| # 35:                      | 28(N) | 30(O): | 1.048751 | # 35:                      | 28(N) | 37(H): | 0.693808 |
| # 36:                      | 31(N) | 32(N): | 0.558281 | # 36:                      | 29(N) | 30(N): | 0.621848 |
| # 37:                      | 31(N) | 44(H): | 0.650215 | # 37:                      | 29(N) | 38(H): | 0.663573 |
| # 38:                      | 32(N) | 33(O): | 0.988754 | # 38:                      | 30(N) | 39(H): | 0.691928 |
| # 39:                      | 32(N) | 34(O): | 1.048239 | # 39:                      | 30(N) | 40(H): | 0.692470 |
| # 40:                      | 35(N) | 36(N): | 0.558307 | # 40:                      | 31(N) | 32(N): | 0.621656 |
| # 41:                      | 35(N) | 45(H): | 0.650224 | # 41:                      | 31(N) | 41(H): | 0.671765 |
| # 42:                      | 36(N) | 37(O): | 0.988748 | # 42:                      | 32(N) | 42(H): | 0.692061 |
| # 43:                      | 36(N) | 38(O): | 1.048228 | # 43:                      | 32(N) | 43(H): | 0.694268 |
| # 44:                      | 39(N) | 40(N): | 0.545869 | # 44:                      | 33(N) | 34(N): | 0.657362 |
| # 45:                      | 39(N) | 46(H): | 0.647106 | # 45:                      | 33(N) | 44(H): | 0.669941 |
| # 46:                      | 40(N) | 41(O): | 0.992186 | # 46:                      | 34(N) | 45(H): | 0.694408 |
| # 47:                      | 40(N) | 42(O): | 1.048750 | # 47:                      | 34(N) | 46(H): | 0.694773 |
| # 32:                      | 27(N) | 28(N): | 0.545837 | # 32:                      | 27(N) | 28(N): | 0.619149 |
| B7                         |       |        |          | B8                         |       |        |          |
| The bond order >= 0.050000 |       |        |          | The bond order >= 0.050000 |       |        |          |

---

|   |     |       |        |          |   |     |       |        |          |
|---|-----|-------|--------|----------|---|-----|-------|--------|----------|
| # | 1:  | 1(N)  | 2(N):  | 1.439134 | # | 1:  | 1(N)  | 2(N):  | 1.454131 |
| # | 2:  | 1(N)  | 3(C):  | 0.926231 | # | 2:  | 1(N)  | 3(C):  | 0.912691 |
| # | 3:  | 2(N)  | 4(C):  | 0.925490 | # | 3:  | 2(N)  | 4(C):  | 0.912693 |
| # | 4:  | 3(C)  | 5(C):  | 1.366436 | # | 4:  | 3(C)  | 5(C):  | 1.363563 |
| # | 5:  | 3(C)  | 9(C):  | 1.407804 | # | 5:  | 3(C)  | 9(C):  | 1.404293 |
| # | 6:  | 4(C)  | 10(C): | 1.358347 | # | 6:  | 4(C)  | 10(C): | 1.363573 |
| # | 7:  | 4(C)  | 14(C): | 1.412038 | # | 7:  | 4(C)  | 14(C): | 1.404305 |
| # | 8:  | 5(C)  | 6(C):  | 1.396610 | # | 8:  | 5(C)  | 6(C):  | 1.377265 |
| # | 9:  | 5(C)  | 15(N): | 0.685382 | # | 9:  | 5(C)  | 15(N): | 0.677810 |
| # | 10: | 6(C)  | 7(N):  | 1.215819 | # | 10: | 6(C)  | 7(N):  | 1.201490 |
| # | 11: | 6(C)  | 34(C): | 1.043763 | # | 11: | 6(C)  | 37(C): | 1.007115 |
| # | 12: | 7(N)  | 8(C):  | 1.208468 | # | 12: | 7(N)  | 8(C):  | 1.204289 |
| # | 13: | 8(C)  | 9(C):  | 1.408980 | # | 13: | 8(C)  | 9(C):  | 1.399269 |
| # | 14: | 8(C)  | 27(C): | 1.044678 | # | 14: | 8(C)  | 27(C): | 1.012998 |
| # | 15: | 9(C)  | 21(N): | 0.690997 | # | 15: | 9(C)  | 21(N): | 0.691529 |
| # | 16: | 10(C) | 11(C): | 1.411994 | # | 16: | 10(C) | 11(C): | 1.377258 |
| # | 17: | 10(C) | 18(N): | 0.682632 | # | 17: | 10(C) | 18(N): | 0.677802 |
| # | 18: | 11(C) | 12(N): | 1.199065 | # | 18: | 11(C) | 12(N): | 1.201501 |
| # | 19: | 11(C) | 41(C): | 1.045804 | # | 19: | 11(C) | 47(C): | 1.007110 |
| # | 20: | 12(N) | 13(C): | 1.214107 | # | 20: | 12(N) | 13(C): | 1.204289 |
| # | 21: | 13(C) | 14(C): | 1.393711 | # | 21: | 13(C) | 14(C): | 1.399273 |
| # | 22: | 13(C) | 48(C): | 1.028379 | # | 22: | 13(C) | 57(C): | 1.013003 |
| # | 23: | 14(C) | 24(N): | 0.688861 | # | 23: | 14(C) | 24(N): | 0.691556 |
| # | 24: | 15(N) | 16(O): | 0.958139 | # | 24: | 15(N) | 16(O): | 0.956421 |
| # | 25: | 15(N) | 17(O): | 1.003376 | # | 25: | 15(N) | 17(O): | 1.034093 |
| # | 26: | 18(N) | 19(O): | 1.000914 | # | 26: | 18(N) | 19(O): | 1.034060 |
| # | 27: | 18(N) | 20(O): | 0.963310 | # | 27: | 18(N) | 20(O): | 0.956422 |
| # | 28: | 21(N) | 22(O): | 0.944245 | # | 28: | 21(N) | 22(O): | 0.954012 |
| # | 29: | 21(N) | 23(O): | 0.989519 | # | 29: | 21(N) | 23(O): | 1.011803 |
| # | 30: | 24(N) | 25(O): | 0.943000 | # | 30: | 24(N) | 25(O): | 0.954016 |
| # | 31: | 24(N) | 26(O): | 1.011115 | # | 31: | 24(N) | 26(O): | 1.011767 |
| # | 32: | 27(C) | 28(N): | 0.541590 | # | 32: | 27(C) | 28(N): | 0.457241 |
| # | 33: | 27(C) | 31(N): | 0.543987 | # | 33: | 27(C) | 31(N): | 0.522536 |
| # | 34: | 27(C) | 55(H): | 0.832409 | # | 34: | 27(C) | 34(N): | 0.463598 |
| # | 35: | 28(N) | 29(O): | 0.987437 | # | 35: | 28(N) | 29(O): | 1.047357 |
| # | 36: | 28(N) | 30(O): | 1.025437 | # | 36: | 28(N) | 30(O): | 1.020500 |
| # | 37: | 31(N) | 32(O): | 0.994125 | # | 37: | 31(N) | 32(O): | 0.978608 |
| # | 38: | 31(N) | 33(O): | 1.029766 | # | 38: | 31(N) | 33(O): | 1.049346 |
| # | 39: | 34(C) | 35(N): | 0.534155 | # | 39: | 34(N) | 35(O): | 1.071828 |
| # | 40: | 34(C) | 38(N): | 0.540465 | # | 40: | 34(N) | 36(O): | 1.004603 |
| # | 41: | 34(C) | 56(H): | 0.830808 | # | 41: | 37(C) | 38(N): | 0.529236 |
| # | 42: | 35(N) | 36(O): | 0.999706 | # | 42: | 37(C) | 41(N): | 0.458740 |
| # | 43: | 35(N) | 37(O): | 1.018683 | # | 43: | 37(C) | 44(N): | 0.453161 |
| # | 44: | 38(N) | 39(O): | 0.994918 | # | 44: | 38(N) | 39(O): | 0.974044 |
| # | 45: | 38(N) | 40(O): | 1.037786 | # | 45: | 38(N) | 40(O): | 1.047543 |

---

|                            |       |        |          |                            |       |        |          |
|----------------------------|-------|--------|----------|----------------------------|-------|--------|----------|
| # 46:                      | 41(C) | 42(N): | 0.535470 | # 46:                      | 41(N) | 42(O): | 1.000328 |
| # 47:                      | 41(C) | 45(N): | 0.536991 | # 47:                      | 41(N) | 43(O): | 1.074560 |
| # 48:                      | 41(C) | 57(H): | 0.834003 | # 48:                      | 44(N) | 45(O): | 1.048630 |
| # 49:                      | 42(N) | 43(O): | 0.999635 | # 49:                      | 44(N) | 46(O): | 1.020287 |
| # 50:                      | 42(N) | 44(O): | 1.022820 | # 50:                      | 47(C) | 48(N): | 0.529203 |
| # 51:                      | 45(N) | 46(O): | 0.988872 | # 51:                      | 47(C) | 51(N): | 0.458740 |
| # 52:                      | 45(N) | 47(O): | 1.033770 | # 52:                      | 47(C) | 54(N): | 0.453172 |
| # 53:                      | 48(C) | 49(N): | 0.554592 | # 53:                      | 48(N) | 49(O): | 0.974049 |
| # 54:                      | 48(C) | 52(N): | 0.526082 | # 54:                      | 48(N) | 50(O): | 1.047553 |
| # 55:                      | 48(C) | 58(H): | 0.830761 | # 55:                      | 51(N) | 52(O): | 1.000354 |
| # 56:                      | 49(N) | 50(O): | 1.001370 | # 56:                      | 51(N) | 53(O): | 1.074594 |
| # 57:                      | 49(N) | 51(O): | 1.024049 | # 57:                      | 54(N) | 55(O): | 1.048619 |
| # 58:                      | 52(N) | 53(O): | 0.979629 | # 58:                      | 54(N) | 56(O): | 1.020291 |
| # 59:                      | 52(N) | 54(O): | 1.031181 | # 59:                      | 57(C) | 58(N): | 0.457237 |
|                            |       |        |          | # 60:                      | 57(C) | 61(N): | 0.522540 |
|                            |       |        |          | # 61:                      | 57(C) | 64(N): | 0.463595 |
| # 54:                      | 48(C) | 52(N): | 0.526082 | # 62:                      | 58(N) | 59(O): | 1.047354 |
|                            |       |        |          | # 63:                      | 58(N) | 60(O): | 1.020496 |
|                            |       |        |          | # 64:                      | 61(N) | 62(O): | 0.978600 |
|                            |       |        |          | # 65:                      | 61(N) | 63(O): | 1.049290 |
|                            |       |        |          | # 66:                      | 64(N) | 65(O): | 1.071839 |
|                            |       |        |          | # 67:                      | 64(N) | 66(O): | 1.004598 |
|                            |       |        |          | # 43:                      | 37(C) | 44(N): | 0.453161 |
| <b>B9</b>                  |       |        |          | <b>B10</b>                 |       |        |          |
| The bond order >= 0.050000 |       |        |          | The bond order >= 0.050000 |       |        |          |
| # 1:                       | 1(N)  | 2(N):  | 1.464493 | # 1:                       | 1(N)  | 2(N):  | 1.444620 |
| # 2:                       | 1(N)  | 3(C):  | 0.928313 | # 2:                       | 1(N)  | 3(C):  | 0.923031 |
| # 3:                       | 2(N)  | 4(C):  | 0.911467 | # 3:                       | 2(N)  | 4(C):  | 0.916586 |
| # 4:                       | 3(C)  | 5(C):  | 1.365664 | # 4:                       | 3(C)  | 5(C):  | 1.397268 |
| # 5:                       | 3(C)  | 9(C):  | 1.397977 | # 5:                       | 3(C)  | 9(C):  | 1.362232 |
| # 6:                       | 4(C)  | 10(C): | 1.366164 | # 6:                       | 4(C)  | 10(C): | 1.397347 |
| # 7:                       | 4(C)  | 14(C): | 1.372840 | # 7:                       | 4(C)  | 14(C): | 1.337699 |
| # 8:                       | 5(C)  | 6(C):  | 1.413401 | # 8:                       | 5(C)  | 6(C):  | 1.405187 |
| # 9:                       | 5(C)  | 35(N): | 0.670127 | # 9:                       | 5(C)  | 39(N): | 0.679252 |
| # 10:                      | 6(C)  | 7(N):  | 1.266353 | # 10:                      | 6(C)  | 7(N):  | 1.179462 |
| # 11:                      | 6(C)  | 32(N): | 0.804657 | # 11:                      | 6(C)  | 17(N): | 0.893913 |
| # 12:                      | 7(N)  | 8(C):  | 1.257891 | # 12:                      | 7(N)  | 8(C):  | 1.171282 |
| # 13:                      | 8(C)  | 9(C):  | 1.445135 | # 13:                      | 8(C)  | 9(C):  | 1.369162 |
| # 14:                      | 8(C)  | 27(N): | 0.800321 | # 14:                      | 8(C)  | 23(N): | 0.910743 |
| # 15:                      | 9(C)  | 41(N): | 0.687665 | # 15:                      | 9(C)  | 45(N): | 0.667400 |
| # 16:                      | 10(C) | 11(C): | 1.409830 | # 16:                      | 10(C) | 11(C): | 1.333156 |
| # 17:                      | 10(C) | 38(N): | 0.668478 | # 17:                      | 10(C) | 42(N): | 0.665774 |
| # 18:                      | 11(C) | 12(N): | 1.260110 | # 18:                      | 11(C) | 12(N): | 1.226119 |

---

|       |       |       |            |       |       |       |            |
|-------|-------|-------|------------|-------|-------|-------|------------|
| # 19: | 11(C) | 22(N) | : 0.819404 | # 19: | 11(C) | 35(N) | : 0.947544 |
| # 20: | 12(N) | 13(C) | : 1.258895 | # 20: | 12(N) | 13(C) | : 1.204824 |
| # 21: | 13(C) | 14(C) | : 1.440522 | # 21: | 13(C) | 14(C) | : 1.418883 |
| # 22: | 13(C) | 17(N) | : 0.783558 | # 22: | 13(C) | 29(N) | : 0.821136 |
| # 23: | 14(C) | 44(N) | : 0.685782 | # 23: | 14(C) | 48(N) | : 0.710781 |
| # 24: | 15(C) | 16(N) | : 1.298126 | # 24: | 15(C) | 16(N) | : 1.421997 |
| # 25: | 15(C) | 19(C) | : 1.274816 | # 25: | 15(C) | 19(C) | : 1.225368 |
| # 26: | 15(C) | 47(N) | : 0.760272 | # 26: | 15(C) | 51(N) | : 0.747159 |
| # 27: | 16(N) | 17(N) | : 0.808705 | # 27: | 16(N) | 17(N) | : 0.617759 |
| # 28: | 17(N) | 18(C) | : 0.935155 | # 28: | 17(N) | 18(C) | : 0.899476 |
| # 29: | 18(C) | 19(C) | : 1.440724 | # 29: | 18(C) | 19(C) | : 1.371926 |
| # 30: | 18(C) | 50(N) | : 0.817179 | # 30: | 18(C) | 20(N) | : 1.149467 |
| # 31: | 19(C) | 53(N) | : 0.732680 | # 31: | 19(C) | 54(N) | : 0.849047 |
| # 32: | 20(C) | 21(N) | : 1.329628 | # 32: | 20(N) | 75(H) | : 0.678845 |
| # 33: | 20(C) | 24(C) | : 1.261232 | # 33: | 20(N) | 76(H) | : 0.656796 |
| # 34: | 20(C) | 56(N) | : 0.754209 | # 34: | 21(C) | 22(N) | : 1.422075 |
| # 35: | 21(N) | 22(N) | : 0.772531 | # 35: | 21(C) | 25(C) | : 1.228729 |
| # 36: | 22(N) | 23(C) | : 0.914449 | # 36: | 21(C) | 57(N) | : 0.744514 |
| # 37: | 23(C) | 24(C) | : 1.454996 | # 37: | 22(N) | 23(N) | : 0.610665 |
| # 38: | 23(C) | 59(N) | : 0.788151 | # 38: | 23(N) | 24(C) | : 0.882079 |
| # 39: | 24(C) | 62(N) | : 0.738829 | # 39: | 24(C) | 25(C) | : 1.359414 |
| # 40: | 25(C) | 26(N) | : 1.311578 | # 40: | 24(C) | 26(N) | : 1.189178 |
| # 41: | 25(C) | 29(C) | : 1.272749 | # 41: | 25(C) | 60(N) | : 0.859418 |
| # 42: | 25(C) | 65(N) | : 0.759579 | # 42: | 26(N) | 77(H) | : 0.671069 |
| # 43: | 26(N) | 27(N) | : 0.792009 | # 43: | 26(N) | 78(H) | : 0.656696 |
| # 44: | 27(N) | 28(C) | : 0.922848 | # 44: | 27(C) | 28(N) | : 1.437738 |
| # 45: | 28(C) | 29(C) | : 1.443925 | # 45: | 27(C) | 31(C) | : 1.229267 |
| # 46: | 28(C) | 68(N) | : 0.802322 | # 46: | 27(C) | 63(N) | : 0.739589 |
| # 47: | 29(C) | 71(N) | : 0.735844 | # 47: | 28(N) | 29(N) | : 0.585302 |
| # 48: | 30(C) | 31(N) | : 1.319073 | # 48: | 29(N) | 30(C) | : 0.885313 |
| # 49: | 30(C) | 34(C) | : 1.267630 | # 49: | 30(C) | 31(C) | : 1.359642 |
| # 50: | 30(C) | 74(N) | : 0.756819 | # 50: | 30(C) | 32(N) | : 1.187619 |
| # 51: | 31(N) | 32(N) | : 0.781373 | # 51: | 31(C) | 66(N) | : 0.850816 |
| # 52: | 32(N) | 33(C) | : 0.919370 | # 52: | 32(N) | 79(H) | : 0.663018 |
| # 53: | 33(C) | 34(C) | : 1.446834 | # 53: | 32(N) | 80(H) | : 0.658590 |
| # 54: | 33(C) | 77(N) | : 0.798430 | # 54: | 33(C) | 34(N) | : 1.420579 |
| # 55: | 34(C) | 80(N) | : 0.734771 | # 55: | 33(C) | 37(C) | : 1.233121 |
| # 56: | 35(N) | 36(O) | : 0.995404 | # 56: | 33(C) | 69(N) | : 0.746675 |
| # 57: | 35(N) | 37(O) | : 0.993324 | # 57: | 34(N) | 35(N) | : 0.616103 |
| # 58: | 38(N) | 39(O) | : 0.985111 | # 58: | 35(N) | 36(C) | : 0.844598 |
| # 59: | 38(N) | 40(O) | : 1.001029 | # 59: | 36(C) | 37(C) | : 1.355467 |
| # 60: | 41(N) | 42(O) | : 0.992856 | # 60: | 36(C) | 38(N) | : 1.218786 |
| # 61: | 41(N) | 43(O) | : 0.971613 | # 61: | 37(C) | 72(N) | : 0.859076 |
| # 62: | 44(N) | 45(O) | : 0.974029 | # 62: | 38(N) | 81(H) | : 0.658100 |
| # 63: | 44(N) | 46(O) | : 0.976911 | # 63: | 38(N) | 82(H) | : 0.657233 |

---

|                            |       |       |            |                            |       |       |            |
|----------------------------|-------|-------|------------|----------------------------|-------|-------|------------|
| # 64:                      | 47(N) | 48(O) | : 1.001343 | # 64:                      | 39(N) | 40(O) | : 0.996387 |
| # 65:                      | 47(N) | 49(O) | : 0.953422 | # 65:                      | 39(N) | 41(O) | : 0.991941 |
| # 66:                      | 50(N) | 51(O) | : 0.929196 | # 66:                      | 42(N) | 43(O) | : 1.009875 |
| # 67:                      | 50(N) | 52(O) | : 0.988176 | # 67:                      | 42(N) | 44(O) | : 1.010742 |
| # 68:                      | 53(N) | 54(O) | : 1.010338 | # 68:                      | 45(N) | 46(O) | : 0.991219 |
| # 69:                      | 53(N) | 55(O) | : 1.011356 | # 69:                      | 45(N) | 47(O) | : 1.012168 |
| # 70:                      | 56(N) | 57(O) | : 1.006077 | # 70:                      | 48(N) | 49(O) | : 0.994662 |
| # 71:                      | 56(N) | 58(O) | : 0.960109 | # 71:                      | 48(N) | 50(O) | : 0.931780 |
| # 72:                      | 59(N) | 60(O) | : 0.952357 | # 72:                      | 51(N) | 52(O) | : 1.002918 |
| # 73:                      | 59(N) | 61(O) | : 0.985272 | # 73:                      | 51(N) | 53(O) | : 0.987410 |
| # 74:                      | 62(N) | 63(O) | : 1.003041 | # 74:                      | 54(N) | 55(O) | : 0.858266 |
| # 75:                      | 62(N) | 64(O) | : 1.008582 | # 75:                      | 54(N) | 56(O) | : 0.982471 |
| # 76:                      | 65(N) | 66(O) | : 1.007235 | # 76:                      | 57(N) | 58(O) | : 0.994314 |
| # 77:                      | 65(N) | 67(O) | : 0.959734 | # 77:                      | 57(N) | 59(O) | : 0.992247 |
| # 78:                      | 68(N) | 69(O) | : 0.944488 | # 78:                      | 60(N) | 61(O) | : 0.969571 |
| # 79:                      | 68(N) | 70(O) | : 0.985468 | # 79:                      | 60(N) | 62(O) | : 0.855726 |
| # 80:                      | 71(N) | 72(O) | : 1.012536 | # 80:                      | 63(N) | 64(O) | : 1.009287 |
| # 81:                      | 71(N) | 73(O) | : 1.015738 | # 81:                      | 63(N) | 65(O) | : 0.962461 |
| # 82:                      | 74(N) | 75(O) | : 1.008380 | # 82:                      | 66(N) | 67(O) | : 0.863756 |
| # 83:                      | 74(N) | 76(O) | : 0.960513 | # 83:                      | 66(N) | 68(O) | : 0.965105 |
| # 84:                      | 77(N) | 78(O) | : 0.990146 | # 84:                      | 69(N) | 70(O) | : 0.994650 |
| # 85:                      | 77(N) | 79(O) | : 0.947205 | # 85:                      | 69(N) | 71(O) | : 0.991286 |
| # 86:                      | 80(N) | 81(O) | : 1.013281 | # 86:                      | 72(N) | 73(O) | : 0.960753 |
| # 87:                      | 80(N) | 82(O) | : 1.001638 | # 87:                      | 72(N) | 74(O) | : 0.867522 |
| <hr/>                      |       |       |            | <hr/>                      |       |       |            |
| # 17:                      | 10(C) | 38(N) | : 0.668478 | # 47:                      | 28(N) | 29(N) | : 0.585302 |
| <hr/>                      |       |       |            | <hr/>                      |       |       |            |
| B11                        |       |       |            | B12                        |       |       |            |
| The bond order >= 0.050000 |       |       |            | The bond order >= 0.050000 |       |       |            |
| # 1:                       | 1(N)  | 2(N)  | : 1.444527 | # 1:                       | 1(N)  | 2(N)  | : 1.425156 |
| # 2:                       | 1(N)  | 3(C)  | : 0.926682 | # 2:                       | 1(N)  | 3(C)  | : 0.924985 |
| # 3:                       | 2(N)  | 4(C)  | : 0.926686 | # 3:                       | 2(N)  | 4(C)  | : 0.934885 |
| # 4:                       | 3(C)  | 5(C)  | : 1.354477 | # 4:                       | 3(C)  | 5(C)  | : 1.319410 |
| # 5:                       | 3(C)  | 9(C)  | : 1.396139 | # 5:                       | 3(C)  | 9(C)  | : 1.406053 |
| # 6:                       | 4(C)  | 10(C) | : 1.354487 | # 6:                       | 4(C)  | 10(C) | : 1.357755 |
| # 7:                       | 4(C)  | 14(C) | : 1.396151 | # 7:                       | 4(C)  | 14(C) | : 1.421964 |
| # 8:                       | 5(C)  | 6(C)  | : 1.414324 | # 8:                       | 5(C)  | 6(C)  | : 1.390943 |
| # 9:                       | 5(C)  | 39(N) | : 0.674611 | # 9:                       | 5(C)  | 39(N) | : 0.717248 |
| # 10:                      | 6(C)  | 7(N)  | : 1.248447 | # 10:                      | 6(C)  | 7(N)  | : 1.202990 |
| # 11:                      | 6(C)  | 17(N) | : 0.831741 | # 11:                      | 6(C)  | 17(N) | : 0.847162 |
| # 12:                      | 7(N)  | 8(C)  | : 1.255510 | # 12:                      | 7(N)  | 8(C)  | : 1.224178 |
| # 13:                      | 8(C)  | 9(C)  | : 1.410734 | # 13:                      | 8(C)  | 9(C)  | : 1.326572 |
| # 14:                      | 8(C)  | 23(N) | : 0.801747 | # 14:                      | 8(C)  | 23(N) | : 0.971465 |
| # 15:                      | 9(C)  | 45(N) | : 0.693290 | # 15:                      | 9(C)  | 45(N) | : 0.660232 |
| # 16:                      | 10(C) | 11(C) | : 1.414326 | # 16:                      | 10(C) | 11(C) | : 1.405704 |

---

|       |       |       |            |       |       |       |            |
|-------|-------|-------|------------|-------|-------|-------|------------|
| # 17: | 10(C) | 42(N) | : 0.674612 | # 17: | 10(C) | 42(N) | : 0.679806 |
| # 18: | 11(C) | 12(N) | : 1.248452 | # 18: | 11(C) | 12(N) | : 1.230570 |
| # 19: | 11(C) | 35(N) | : 0.831734 | # 19: | 11(C) | 35(N) | : 0.847112 |
| # 20: | 12(N) | 13(C) | : 1.255508 | # 20: | 12(N) | 13(C) | : 1.234525 |
| # 21: | 13(C) | 14(C) | : 1.410726 | # 21: | 13(C) | 14(C) | : 1.409588 |
| # 22: | 13(C) | 29(N) | : 0.801750 | # 22: | 13(C) | 29(N) | : 0.855351 |
| # 23: | 14(C) | 48(N) | : 0.693289 | # 23: | 14(C) | 48(N) | : 0.682245 |
| # 24: | 15(C) | 16(N) | : 1.308504 | # 24: | 15(C) | 16(N) | : 1.424129 |
| # 25: | 15(C) | 19(C) | : 1.210668 | # 25: | 15(C) | 19(N) | : 1.097430 |
| # 26: | 15(C) | 51(N) | : 0.800778 | # 26: | 15(C) | 51(N) | : 0.744548 |
| # 27: | 16(N) | 17(N) | : 0.837349 | # 27: | 16(N) | 17(N) | : 0.619463 |
| # 28: | 17(N) | 18(C) | : 0.837705 | # 28: | 17(N) | 18(C) | : 0.817562 |
| # 29: | 18(C) | 19(C) | : 1.361563 | # 29: | 18(C) | 19(N) | : 1.277253 |
| # 30: | 18(C) | 54(N) | : 0.886698 | # 30: | 18(C) | 20(N) | : 1.153304 |
| # 31: | 19(C) | 20(N) | : 1.163041 | # 31: | 20(N) | 63(H) | : 0.663127 |
| # 32: | 20(N) | 75(H) | : 0.672554 | # 32: | 20(N) | 64(H) | : 0.678526 |
| # 33: | 20(N) | 76(H) | : 0.675040 | # 33: | 21(C) | 22(N) | : 1.399630 |
| # 34: | 21(C) | 22(N) | : 1.306672 | # 34: | 21(C) | 25(N) | : 1.097850 |
| # 35: | 21(C) | 25(C) | : 1.215940 | # 35: | 21(C) | 54(N) | : 0.732113 |
| # 36: | 21(C) | 57(N) | : 0.805174 | # 36: | 22(N) | 23(N) | : 0.642726 |
| # 37: | 22(N) | 23(N) | : 0.854388 | # 37: | 23(N) | 24(C) | : 0.780935 |
| # 38: | 23(N) | 24(C) | : 0.836395 | # 38: | 24(C) | 25(N) | : 1.275026 |
| # 39: | 24(C) | 25(C) | : 1.362546 | # 39: | 24(C) | 26(N) | : 1.210653 |
| # 40: | 24(C) | 60(N) | : 0.920646 | # 40: | 26(N) | 65(H) | : 0.657378 |
| # 41: | 25(C) | 26(N) | : 1.167371 | # 41: | 26(N) | 66(H) | : 0.675584 |
| # 42: | 26(N) | 77(H) | : 0.675193 | # 42: | 27(C) | 28(N) | : 1.415099 |
| # 43: | 26(N) | 78(H) | : 0.677678 | # 43: | 27(C) | 31(N) | : 1.078220 |
| # 44: | 27(C) | 28(N) | : 1.306680 | # 44: | 27(C) | 57(N) | : 0.738171 |
| # 45: | 27(C) | 31(C) | : 1.215943 | # 45: | 28(N) | 29(N) | : 0.634832 |
| # 46: | 27(C) | 63(N) | : 0.805170 | # 46: | 29(N) | 30(C) | : 0.834284 |
| # 47: | 28(N) | 29(N) | : 0.854385 | # 47: | 30(C) | 31(N) | : 1.286234 |
| # 48: | 29(N) | 30(C) | : 0.836392 | # 48: | 30(C) | 32(N) | : 1.126121 |
| # 49: | 30(C) | 31(C) | : 1.362551 | # 49: | 32(N) | 67(H) | : 0.668302 |
| # 50: | 30(C) | 66(N) | : 0.920644 | # 50: | 32(N) | 68(H) | : 0.674979 |
| # 51: | 31(C) | 32(N) | : 1.167372 | # 51: | 33(C) | 34(N) | : 1.411810 |
| # 52: | 32(N) | 79(H) | : 0.675198 | # 52: | 33(C) | 37(N) | : 1.075028 |
| # 53: | 32(N) | 80(H) | : 0.677683 | # 53: | 33(C) | 60(N) | : 0.738962 |
| # 54: | 33(C) | 34(N) | : 1.308498 | # 54: | 34(N) | 35(N) | : 0.641133 |
| # 55: | 33(C) | 37(C) | : 1.210676 | # 55: | 35(N) | 36(C) | : 0.847287 |
| # 56: | 33(C) | 69(N) | : 0.800778 | # 56: | 36(C) | 37(N) | : 1.289742 |
| # 57: | 34(N) | 35(N) | : 0.837354 | # 57: | 36(C) | 38(N) | : 1.114166 |
| # 58: | 35(N) | 36(C) | : 0.837707 | # 58: | 38(N) | 69(H) | : 0.668557 |
| # 59: | 36(C) | 37(C) | : 1.361562 | # 59: | 38(N) | 70(H) | : 0.678513 |
| # 60: | 36(C) | 72(N) | : 0.886702 | # 60: | 39(N) | 40(O) | : 0.929128 |
| # 61: | 37(C) | 38(N) | : 1.163038 | # 61: | 39(N) | 41(O) | : 0.973968 |

---

|                            |       |        |          |                            |       |        |          |
|----------------------------|-------|--------|----------|----------------------------|-------|--------|----------|
| # 62:                      | 38(N) | 81(H): | 0.672558 | # 62:                      | 42(N) | 43(O): | 0.952397 |
| # 63:                      | 38(N) | 82(H): | 0.675041 | # 63:                      | 42(N) | 44(O): | 1.035052 |
| # 64:                      | 39(N) | 40(O): | 0.988620 | # 64:                      | 45(N) | 46(O): | 0.990860 |
| # 65:                      | 39(N) | 41(O): | 1.006208 | # 65:                      | 45(N) | 47(O): | 1.021433 |
| # 66:                      | 42(N) | 43(O): | 1.006207 | # 66:                      | 48(N) | 49(O): | 1.035409 |
| # 67:                      | 42(N) | 44(O): | 0.988627 | # 67:                      | 48(N) | 50(O): | 0.960207 |
| # 68:                      | 45(N) | 46(O): | 0.949510 | # 68:                      | 51(N) | 52(O): | 0.995815 |
| # 69:                      | 45(N) | 47(O): | 0.996683 | # 69:                      | 51(N) | 53(O): | 0.949630 |
| # 70:                      | 48(N) | 49(O): | 0.949506 | # 70:                      | 54(N) | 55(O): | 0.985128 |
| # 71:                      | 48(N) | 50(O): | 0.996684 | # 71:                      | 54(N) | 56(O): | 0.969376 |
| # 72:                      | 51(N) | 52(O): | 1.008130 | # 72:                      | 57(N) | 58(O): | 0.984920 |
| # 73:                      | 51(N) | 53(O): | 0.884625 | # 73:                      | 57(N) | 59(O): | 0.968844 |
| # 74:                      | 54(N) | 55(O): | 0.935450 | # 74:                      | 60(N) | 61(O): | 0.983463 |
| # 75:                      | 54(N) | 56(O): | 0.869383 | # 75:                      | 60(N) | 62(O): | 0.973315 |
| # 76:                      | 57(N) | 58(O): | 1.001417 |                            |       |        |          |
| # 77:                      | 57(N) | 59(O): | 0.878051 | # 27:                      | 16(N) | 17(N): | 0.619463 |
| # 78:                      | 60(N) | 61(O): | 0.893062 |                            |       |        |          |
| # 79:                      | 60(N) | 62(O): | 0.883656 |                            |       |        |          |
| # 80:                      | 63(N) | 64(O): | 1.001414 |                            |       |        |          |
| # 81:                      | 63(N) | 65(O): | 0.878053 |                            |       |        |          |
| # 82:                      | 66(N) | 67(O): | 0.893043 |                            |       |        |          |
| # 83:                      | 66(N) | 68(O): | 0.883671 |                            |       |        |          |
| # 84:                      | 69(N) | 70(O): | 1.008128 |                            |       |        |          |
| # 85:                      | 69(N) | 71(O): | 0.884624 |                            |       |        |          |
| # 86:                      | 72(N) | 73(O): | 0.935442 |                            |       |        |          |
| # 87:                      | 72(N) | 74(O): | 0.869382 |                            |       |        |          |
| # 32:                      | 20(N) | 75(H): | 0.672554 |                            |       |        |          |
| C1                         |       |        |          | C2                         |       |        |          |
| The bond order >= 0.050000 |       |        |          | The bond order >= 0.050000 |       |        |          |
| # 1:                       | 1(N)  | 2(N):  | 0.667634 | # 1:                       | 1(N)  | 2(N):  | 0.671968 |
| # 2:                       | 1(N)  | 3(C):  | 1.004919 | # 2:                       | 1(N)  | 3(C):  | 1.006695 |
| # 3:                       | 1(N)  | 31(H): | 0.632053 | # 3:                       | 1(N)  | 33(H): | 0.627989 |
| # 4:                       | 2(N)  | 4(C):  | 1.004934 | # 4:                       | 2(N)  | 4(C):  | 1.006646 |
| # 5:                       | 2(N)  | 32(H): | 0.632044 | # 5:                       | 2(N)  | 34(H): | 0.627993 |
| # 6:                       | 3(C)  | 5(C):  | 1.327820 | # 6:                       | 3(C)  | 5(C):  | 1.346608 |
| # 7:                       | 3(C)  | 9(C):  | 1.301494 | # 7:                       | 3(C)  | 9(C):  | 1.264437 |
| # 8:                       | 4(C)  | 10(C): | 1.327833 | # 8:                       | 4(C)  | 10(C): | 1.346575 |
| # 9:                       | 4(C)  | 14(C): | 1.301531 | # 9:                       | 4(C)  | 14(C): | 1.264464 |
| # 10:                      | 5(C)  | 6(C):  | 1.398003 | # 10:                      | 5(C)  | 6(C):  | 1.408289 |
| # 11:                      | 5(C)  | 19(N): | 0.664454 | # 11:                      | 5(C)  | 21(N): | 0.653013 |
| # 12:                      | 6(C)  | 7(N):  | 1.173072 | # 12:                      | 6(C)  | 7(N):  | 1.185553 |
| # 13:                      | 6(C)  | 15(C): | 1.253319 | # 13:                      | 6(C)  | 15(N): | 0.908840 |
| # 14:                      | 7(N)  | 8(C):  | 1.250167 | # 14:                      | 7(N)  | 8(C):  | 1.233047 |



|                            |       |        |          |                            |       |        |          |
|----------------------------|-------|--------|----------|----------------------------|-------|--------|----------|
| # 15:                      | 8(C)  | 9(C):  | 1.451437 | # 15:                      | 8(C)  | 9(C):  | 1.449505 |
| # 16:                      | 8(C)  | 33(H): | 0.856547 | # 16:                      | 8(C)  | 35(H): | 0.854756 |
| # 17:                      | 9(C)  | 22(N): | 0.695597 | # 17:                      | 9(C)  | 24(N): | 0.716820 |
| # 18:                      | 10(C) | 11(C): | 1.398016 | # 18:                      | 10(C) | 11(C): | 1.408300 |
| # 19:                      | 10(C) | 28(N): | 0.664460 | # 19:                      | 10(C) | 30(N): | 0.653012 |
| # 20:                      | 11(C) | 12(N): | 1.173038 | # 20:                      | 11(C) | 12(N): | 1.185557 |
| # 21:                      | 11(C) | 17(C): | 1.253321 | # 21:                      | 11(C) | 18(N): | 0.908842 |
| # 22:                      | 12(N) | 13(C): | 1.250190 | # 22:                      | 12(N) | 13(C): | 1.233049 |
| # 23:                      | 13(C) | 14(C): | 1.451404 | # 23:                      | 13(C) | 14(C): | 1.449490 |
| # 24:                      | 13(C) | 34(H): | 0.856547 | # 24:                      | 13(C) | 36(H): | 0.854759 |
| # 25:                      | 14(C) | 25(N): | 0.695607 | # 25:                      | 14(C) | 27(N): | 0.716802 |
| # 26:                      | 15(C) | 16(N): | 2.533222 | # 26:                      | 15(N) | 16(N): | 1.129246 |
| # 27:                      | 17(C) | 18(N): | 2.533226 | # 27:                      | 16(N) | 17(N): | 2.254236 |
| # 28:                      | 19(N) | 20(O): | 0.972516 | # 28:                      | 18(N) | 19(N): | 1.129239 |
| # 29:                      | 19(N) | 21(O): | 0.962132 | # 29:                      | 19(N) | 20(N): | 2.254181 |
| # 30:                      | 22(N) | 23(O): | 1.000274 | # 30:                      | 21(N) | 22(O): | 0.965773 |
| # 31:                      | 22(N) | 24(O): | 0.893055 | # 31:                      | 21(N) | 23(O): | 0.965276 |
| # 32:                      | 25(N) | 26(O): | 1.000263 | # 32:                      | 24(N) | 25(O): | 0.975774 |
| # 33:                      | 25(N) | 27(O): | 0.893063 | # 33:                      | 24(N) | 26(O): | 0.885175 |
| # 34:                      | 28(N) | 29(O): | 0.972484 | # 34:                      | 27(N) | 28(O): | 0.975773 |
| # 35:                      | 28(N) | 30(O): | 0.962155 | # 35:                      | 27(N) | 29(O): | 0.885155 |
|                            |       |        |          | # 36:                      | 30(N) | 31(O): | 0.965771 |
|                            |       |        |          | # 37:                      | 30(N) | 32(O): | 0.965294 |
| # 5:                       | 2(N)  | 32(H): | 0.632044 | # 3:                       | 1(N)  | 33(H): | 0.627989 |
| <b>C3</b>                  |       |        |          | <b>C4</b>                  |       |        |          |
| The bond order >= 0.050000 |       |        |          | The bond order >= 0.050000 |       |        |          |
| # 1:                       | 1(N)  | 2(N):  | 0.674920 | # 1:                       | 1(N)  | 2(N):  | 0.664476 |
| # 2:                       | 1(N)  | 3(C):  | 1.020497 | # 2:                       | 1(N)  | 3(C):  | 1.049995 |
| # 3:                       | 1(N)  | 33(H): | 0.626484 | # 3:                       | 1(N)  | 29(H): | 0.618140 |
| # 4:                       | 2(N)  | 4(C):  | 1.020571 | # 4:                       | 2(N)  | 4(C):  | 1.063291 |
| # 5:                       | 2(N)  | 34(H): | 0.626562 | # 5:                       | 2(N)  | 30(H): | 0.615893 |
| # 6:                       | 3(C)  | 5(C):  | 1.317256 | # 6:                       | 3(C)  | 5(C):  | 1.279081 |
| # 7:                       | 3(C)  | 9(C):  | 1.282751 | # 7:                       | 3(C)  | 9(C):  | 1.274380 |
| # 8:                       | 4(C)  | 10(C): | 1.317299 | # 8:                       | 4(C)  | 10(C): | 1.306829 |
| # 9:                       | 4(C)  | 14(C): | 1.282631 | # 9:                       | 4(C)  | 14(C): | 1.267954 |
| # 10:                      | 5(C)  | 6(C):  | 1.393830 | # 10:                      | 5(C)  | 6(C):  | 1.277801 |
| # 11:                      | 5(C)  | 21(N): | 0.633007 | # 11:                      | 5(C)  | 17(N): | 0.712859 |
| # 12:                      | 6(C)  | 7(N):  | 1.260721 | # 12:                      | 6(C)  | 7(N):  | 1.124130 |
| # 13:                      | 6(C)  | 15(N): | 0.851610 | # 13:                      | 6(C)  | 15(N): | 1.187459 |
| # 14:                      | 7(N)  | 8(C):  | 1.216613 | # 14:                      | 7(N)  | 8(C):  | 1.288567 |
| # 15:                      | 8(C)  | 9(C):  | 1.470923 | # 15:                      | 8(C)  | 9(C):  | 1.416762 |
| # 16:                      | 8(C)  | 35(H): | 0.856375 | # 16:                      | 8(C)  | 31(H): | 0.854957 |
| # 17:                      | 9(C)  | 24(N): | 0.693111 | # 17:                      | 9(C)  | 20(N): | 0.737600 |

|                            |       |        |          |                            |       |        |          |
|----------------------------|-------|--------|----------|----------------------------|-------|--------|----------|
| # 18:                      | 10(C) | 11(C): | 1.393849 | # 18:                      | 10(C) | 11(C): | 1.280889 |
| # 19:                      | 10(C) | 30(N): | 0.633021 | # 19:                      | 10(C) | 26(N): | 0.734073 |
| # 20:                      | 11(C) | 12(N): | 1.260768 | # 20:                      | 11(C) | 12(N): | 1.117804 |
| # 21:                      | 11(C) | 18(N): | 0.851637 | # 21:                      | 11(C) | 16(N): | 1.192224 |
| # 22:                      | 12(N) | 13(C): | 1.216613 | # 22:                      | 12(N) | 13(C): | 1.295672 |
| # 23:                      | 13(C) | 14(C): | 1.470940 | # 23:                      | 13(C) | 14(C): | 1.410156 |
| # 24:                      | 13(C) | 36(H): | 0.856361 | # 24:                      | 13(C) | 32(H): | 0.854027 |
| # 25:                      | 14(C) | 27(N): | 0.693025 | # 25:                      | 14(C) | 23(N): | 0.748490 |
| # 26:                      | 15(N) | 16(F): | 0.173371 | # 26:                      | 15(N) | 33(H): | 0.682059 |
| # 27:                      | 15(N) | 17(F): | 0.138407 | # 27:                      | 15(N) | 34(H): | 0.670716 |
| # 28:                      | 18(N) | 19(F): | 0.173361 | # 28:                      | 16(N) | 35(H): | 0.683349 |
| # 29:                      | 18(N) | 20(F): | 0.138401 | # 29:                      | 16(N) | 36(H): | 0.668836 |
| # 30:                      | 21(N) | 22(O): | 0.979721 | # 30:                      | 17(N) | 18(O): | 0.882441 |
| # 31:                      | 21(N) | 23(O): | 0.985121 | # 31:                      | 17(N) | 19(O): | 0.928155 |
| # 32:                      | 24(N) | 25(O): | 1.000571 | # 32:                      | 20(N) | 21(O): | 0.952918 |
| # 33:                      | 24(N) | 26(O): | 0.882310 | # 33:                      | 20(N) | 22(O): | 0.873266 |
| # 34:                      | 27(N) | 28(O): | 1.000593 | # 34:                      | 23(N) | 24(O): | 0.967091 |
| # 35:                      | 27(N) | 29(O): | 0.882323 | # 35:                      | 23(N) | 25(O): | 0.831816 |
| # 36:                      | 30(N) | 31(O): | 0.979747 | # 36:                      | 26(N) | 27(O): | 0.915208 |
| # 37:                      | 30(N) | 32(O): | 0.985053 | # 37:                      | 26(N) | 28(O): | 0.891974 |
| <hr/>                      |       |        |          | <hr/>                      |       |        |          |
| # 3:                       | 1(N)  | 33(H): | 0.626484 | # 5:                       | 2(N)  | 30(H): | 0.615893 |
| <hr/>                      |       |        |          | <hr/>                      |       |        |          |
| C5                         |       |        |          | C6                         |       |        |          |
| The bond order >= 0.050000 |       |        |          | The bond order >= 0.050000 |       |        |          |
| # 1:                       | 1(N)  | 2(N):  | 0.655761 | # 1:                       | 1(N)  | 2(N):  | 0.671407 |
| # 2:                       | 1(N)  | 3(C):  | 1.026918 | # 2:                       | 1(N)  | 3(C):  | 1.060384 |
| # 3:                       | 1(N)  | 35(H): | 0.629607 | # 3:                       | 1(N)  | 31(H): | 0.615438 |
| # 4:                       | 2(N)  | 4(C):  | 1.042135 | # 4:                       | 2(N)  | 4(C):  | 1.069753 |
| # 5:                       | 2(N)  | 36(H): | 0.620574 | # 5:                       | 2(N)  | 32(H): | 0.616038 |
| # 6:                       | 3(C)  | 5(C):  | 1.307840 | # 6:                       | 3(C)  | 5(C):  | 1.274227 |
| # 7:                       | 3(C)  | 9(C):  | 1.299623 | # 7:                       | 3(C)  | 9(C):  | 1.263854 |
| # 8:                       | 4(C)  | 10(C): | 1.311480 | # 8:                       | 4(C)  | 10(C): | 1.307264 |
| # 9:                       | 4(C)  | 14(C): | 1.288116 | # 9:                       | 4(C)  | 14(C): | 1.259772 |
| # 10:                      | 5(C)  | 6(C):  | 1.330943 | # 10:                      | 5(C)  | 6(C):  | 1.232454 |
| # 11:                      | 5(C)  | 23(N): | 0.682698 | # 11:                      | 5(C)  | 19(N): | 0.743620 |
| # 12:                      | 6(C)  | 7(N):  | 1.207336 | # 12:                      | 6(C)  | 7(N):  | 1.103680 |
| # 13:                      | 6(C)  | 15(N): | 0.957196 | # 13:                      | 6(C)  | 15(N): | 1.163607 |
| # 14:                      | 7(N)  | 8(C):  | 1.247477 | # 14:                      | 7(N)  | 8(C):  | 1.274959 |
| # 15:                      | 8(C)  | 9(C):  | 1.437713 | # 15:                      | 8(C)  | 9(C):  | 1.422138 |
| # 16:                      | 8(C)  | 37(H): | 0.853312 | # 16:                      | 8(C)  | 33(H): | 0.854366 |
| # 17:                      | 9(C)  | 26(N): | 0.712075 | # 17:                      | 9(C)  | 22(N): | 0.742552 |
| # 18:                      | 10(C) | 11(C): | 1.311049 | # 18:                      | 10(C) | 11(C): | 1.235867 |
| # 19:                      | 10(C) | 32(N): | 0.703583 | # 19:                      | 10(C) | 28(N): | 0.752063 |
| # 20:                      | 11(C) | 12(N): | 1.203906 | # 20:                      | 11(C) | 12(N): | 1.098617 |

|                            |       |        |          |                            |       |        |          |
|----------------------------|-------|--------|----------|----------------------------|-------|--------|----------|
| # 21:                      | 11(C) | 19(N): | 0.972697 | # 21:                      | 11(C) | 17(N): | 1.166086 |
| # 22:                      | 12(N) | 13(C): | 1.256895 | # 22:                      | 12(N) | 13(C): | 1.280605 |
| # 23:                      | 13(C) | 14(C): | 1.439770 | # 23:                      | 13(C) | 14(C): | 1.417211 |
| # 24:                      | 13(C) | 38(H): | 0.854804 | # 24:                      | 13(C) | 34(H): | 0.856387 |
| # 25:                      | 14(C) | 29(N): | 0.717879 | # 25:                      | 14(C) | 25(N): | 0.750500 |
| # 26:                      | 15(N) | 16(N): | 0.555869 | # 26:                      | 15(N) | 16(N): | 0.606512 |
| # 27:                      | 15(N) | 39(H): | 0.654829 | # 27:                      | 15(N) | 35(H): | 0.659602 |
| # 28:                      | 16(N) | 17(O): | 0.982485 | # 28:                      | 16(N) | 36(H): | 0.691241 |
| # 29:                      | 16(N) | 18(O): | 1.042880 | # 29:                      | 16(N) | 37(H): | 0.691105 |
| # 30:                      | 19(N) | 20(N): | 0.563313 | # 30:                      | 17(N) | 18(N): | 0.608764 |
| # 31:                      | 19(N) | 40(H): | 0.652766 | # 31:                      | 17(N) | 38(H): | 0.663519 |
| # 32:                      | 20(N) | 21(O): | 0.980368 | # 32:                      | 18(N) | 39(H): | 0.687288 |
| # 33:                      | 20(N) | 22(O): | 1.037502 | # 33:                      | 18(N) | 40(H): | 0.688231 |
| # 34:                      | 23(N) | 24(O): | 0.918616 | # 34:                      | 19(N) | 20(O): | 0.868171 |
| # 35:                      | 23(N) | 25(O): | 0.963801 | # 35:                      | 19(N) | 21(O): | 0.918329 |
| # 36:                      | 26(N) | 27(O): | 0.982402 | # 36:                      | 22(N) | 23(O): | 0.947551 |
| # 37:                      | 26(N) | 28(O): | 0.887779 | # 37:                      | 22(N) | 24(O): | 0.881322 |
| # 38:                      | 29(N) | 30(O): | 0.988991 | # 38:                      | 25(N) | 26(O): | 0.963197 |
| # 39:                      | 29(N) | 31(O): | 0.863485 | # 39:                      | 25(N) | 27(O): | 0.827933 |
| # 40:                      | 32(N) | 33(O): | 0.939997 | # 40:                      | 28(N) | 29(O): | 0.899052 |
| # 41:                      | 32(N) | 34(O): | 0.917879 | # 41:                      | 28(N) | 30(O): | 0.876485 |
| <hr/>                      |       |        |          | <hr/>                      |       |        |          |
| # 26:                      | 15(N) | 16(N): | 0.555869 | # 30:                      | 17(N) | 18(N): | 0.608764 |
| <hr/>                      |       |        |          | <hr/>                      |       |        |          |
| C7                         |       |        |          | C8                         |       |        |          |
| The bond order >= 0.050000 |       |        |          | The bond order >= 0.050000 |       |        |          |
| # 1:                       | 1(N)  | 2(N):  | 0.656200 | # 1:                       | 1(N)  | 2(N):  | 0.646651 |
| # 2:                       | 1(N)  | 3(C):  | 1.033147 | # 2:                       | 1(N)  | 3(C):  | 0.997410 |
| # 3:                       | 1(N)  | 41(H): | 0.625314 | # 3:                       | 1(N)  | 47(H): | 0.644322 |
| # 4:                       | 2(N)  | 4(C):  | 1.024631 | # 4:                       | 2(N)  | 4(C):  | 0.996028 |
| # 5:                       | 2(N)  | 42(H): | 0.635027 | # 5:                       | 2(N)  | 48(H): | 0.643817 |
| # 6:                       | 3(C)  | 5(C):  | 1.319531 | # 6:                       | 3(C)  | 5(C):  | 1.309956 |
| # 7:                       | 3(C)  | 9(C):  | 1.296399 | # 7:                       | 3(C)  | 9(C):  | 1.314605 |
| # 8:                       | 4(C)  | 10(C): | 1.315153 | # 8:                       | 4(C)  | 10(C): | 1.310325 |
| # 9:                       | 4(C)  | 14(C): | 1.311556 | # 9:                       | 4(C)  | 14(C): | 1.314475 |
| # 10:                      | 5(C)  | 6(C):  | 1.392805 | # 10:                      | 5(C)  | 6(C):  | 1.373900 |
| # 11:                      | 5(C)  | 29(N): | 0.681513 | # 11:                      | 5(C)  | 35(N): | 0.670889 |
| # 12:                      | 6(C)  | 7(N):  | 1.203102 | # 12:                      | 6(C)  | 7(N):  | 1.214277 |
| # 13:                      | 6(C)  | 15(C): | 1.021181 | # 13:                      | 6(C)  | 15(C): | 1.004479 |
| # 14:                      | 7(N)  | 8(C):  | 1.228779 | # 14:                      | 7(N)  | 8(C):  | 1.215126 |
| # 15:                      | 8(C)  | 9(C):  | 1.471011 | # 15:                      | 8(C)  | 9(C):  | 1.476246 |
| # 16:                      | 8(C)  | 43(H): | 0.853850 | # 16:                      | 8(C)  | 49(H): | 0.855001 |
| # 17:                      | 9(C)  | 32(N): | 0.692070 | # 17:                      | 9(C)  | 38(N): | 0.695276 |
| # 18:                      | 10(C) | 11(C): | 1.419233 | # 18:                      | 10(C) | 11(C): | 1.375414 |
| # 19:                      | 10(C) | 38(N): | 0.672974 | # 19:                      | 10(C) | 44(N): | 0.672046 |

|                            |       |        |          |                            |       |        |          |
|----------------------------|-------|--------|----------|----------------------------|-------|--------|----------|
| # 20:                      | 11(C) | 12(N): | 1.195520 | # 20:                      | 11(C) | 12(N): | 1.211869 |
| # 21:                      | 11(C) | 22(C): | 1.045381 | # 21:                      | 11(C) | 25(C): | 1.003996 |
| # 22:                      | 12(N) | 13(C): | 1.242631 | # 22:                      | 12(N) | 13(C): | 1.215274 |
| # 23:                      | 13(C) | 14(C): | 1.448732 | # 23:                      | 13(C) | 14(C): | 1.475750 |
| # 24:                      | 13(C) | 44(H): | 0.855956 | # 24:                      | 13(C) | 50(H): | 0.854949 |
| # 25:                      | 14(C) | 35(N): | 0.692926 | # 25:                      | 14(C) | 41(N): | 0.695255 |
| # 26:                      | 15(C) | 16(N): | 0.529885 | # 26:                      | 15(C) | 16(N): | 0.465154 |
| # 27:                      | 15(C) | 19(N): | 0.557912 | # 27:                      | 15(C) | 19(N): | 0.504847 |
| # 28:                      | 15(C) | 45(H): | 0.830578 | # 28:                      | 15(C) | 22(N): | 0.463090 |
| # 29:                      | 16(N) | 17(O): | 0.982843 | # 29:                      | 16(N) | 17(O): | 0.988314 |
| # 30:                      | 16(N) | 18(O): | 1.022593 | # 30:                      | 16(N) | 18(O): | 1.067253 |
| # 31:                      | 19(N) | 20(O): | 0.996561 | # 31:                      | 19(N) | 20(O): | 0.974631 |
| # 32:                      | 19(N) | 21(O): | 1.020696 | # 32:                      | 19(N) | 21(O): | 1.055312 |
| # 33:                      | 22(C) | 23(N): | 0.531064 | # 33:                      | 22(N) | 23(O): | 1.034717 |
| # 34:                      | 22(C) | 26(N): | 0.547276 | # 34:                      | 22(N) | 24(O): | 1.041936 |
| # 35:                      | 22(C) | 46(H): | 0.831323 | # 35:                      | 25(C) | 26(N): | 0.463149 |
| # 36:                      | 23(N) | 24(O): | 0.999950 | # 36:                      | 25(C) | 29(N): | 0.505189 |
| # 37:                      | 23(N) | 25(O): | 1.013106 | # 37:                      | 25(C) | 32(N): | 0.460453 |
| # 38:                      | 26(N) | 27(O): | 0.990909 | # 38:                      | 26(N) | 27(O): | 0.988321 |
| # 39:                      | 26(N) | 28(O): | 1.033915 | # 39:                      | 26(N) | 28(O): | 1.068024 |
| # 40:                      | 29(N) | 30(O): | 0.965986 | # 40:                      | 29(N) | 30(O): | 0.973766 |
| # 41:                      | 29(N) | 31(O): | 0.953408 | # 41:                      | 29(N) | 31(O): | 1.054310 |
| # 42:                      | 32(N) | 33(O): | 1.006945 | # 42:                      | 32(N) | 33(O): | 1.034425 |
| # 43:                      | 32(N) | 34(O): | 0.884013 | # 43:                      | 32(N) | 34(O): | 1.041379 |
| # 44:                      | 35(N) | 36(O): | 0.996467 | # 44:                      | 35(N) | 36(O): | 1.001764 |
| # 45:                      | 35(N) | 37(O): | 0.904539 | # 45:                      | 35(N) | 37(O): | 0.919962 |
| # 46:                      | 38(N) | 39(O): | 0.949401 | # 46:                      | 38(N) | 39(O): | 1.006733 |
| # 47:                      | 38(N) | 40(O): | 0.961426 | # 47:                      | 38(N) | 40(O): | 0.909070 |
|                            |       |        |          | # 48:                      | 41(N) | 42(O): | 1.006729 |
|                            |       |        |          | # 49:                      | 41(N) | 43(O): | 0.909884 |
|                            |       |        |          | # 50:                      | 44(N) | 45(O): | 1.000405 |
| # 26:                      | 15(C) | 16(N): | 0.529885 | # 51:                      | 44(N) | 46(O): | 0.921124 |
|                            |       |        |          | # 28:                      | 15(C) | 22(N): | 0.463090 |
| C9                         |       |        |          | C10                        |       |        |          |
| The bond order >= 0.050000 |       |        |          | The bond order >= 0.050000 |       |        |          |
| # 1:                       | 1(N)  | 2(N):  | 0.675895 | # 1:                       | 1(N)  | 2(N):  | 0.675484 |
| # 2:                       | 1(N)  | 3(C):  | 1.026427 | # 2:                       | 1(N)  | 3(C):  | 1.020575 |
| # 3:                       | 1(N)  | 55(H): | 0.626013 | # 3:                       | 1(N)  | 51(H): | 0.623992 |
| # 4:                       | 2(N)  | 4(C):  | 1.026422 | # 4:                       | 2(N)  | 4(C):  | 1.018262 |
| # 5:                       | 2(N)  | 56(H): | 0.626013 | # 5:                       | 2(N)  | 52(H): | 0.624449 |
| # 6:                       | 3(C)  | 5(C):  | 1.316079 | # 6:                       | 3(C)  | 5(C):  | 1.313104 |
| # 7:                       | 3(C)  | 9(C):  | 1.293096 | # 7:                       | 3(C)  | 9(C):  | 1.268950 |
| # 8:                       | 4(C)  | 10(C): | 1.316082 |                            |       |        |          |

---

|       |       |        |          |       |       |        |          |
|-------|-------|--------|----------|-------|-------|--------|----------|
| # 9:  | 4(C)  | 14(C): | 1.293102 | # 8:  | 4(C)  | 10(C): | 1.310280 |
| # 10: | 5(C)  | 6(C):  | 1.462239 | # 9:  | 4(C)  | 14(C): | 1.269802 |
| # 11: | 5(C)  | 25(N): | 0.649204 | # 10: | 5(C)  | 6(C):  | 1.377511 |
| # 12: | 6(C)  | 7(N):  | 1.278408 | # 11: | 5(C)  | 27(N): | 0.642072 |
| # 13: | 6(C)  | 17(N): | 0.747410 | # 12: | 6(C)  | 7(N):  | 1.180203 |
| # 14: | 7(N)  | 8(C):  | 1.214599 | # 13: | 6(C)  | 17(N): | 0.887534 |
| # 15: | 8(C)  | 9(C):  | 1.458520 | # 14: | 7(N)  | 8(C):  | 1.215078 |
| # 16: | 8(C)  | 57(H): | 0.855765 | # 15: | 8(C)  | 9(C):  | 1.485868 |
| # 17: | 9(C)  | 28(N): | 0.683314 | # 16: | 8(C)  | 53(H): | 0.857148 |
| # 18: | 10(C) | 11(C): | 1.462230 | # 17: | 9(C)  | 30(N): | 0.697471 |
| # 19: | 10(C) | 34(N): | 0.649201 | # 18: | 10(C) | 11(C): | 1.378999 |
| # 20: | 11(C) | 12(N): | 1.278406 | # 19: | 10(C) | 36(N): | 0.646866 |
| # 21: | 11(C) | 22(N): | 0.747412 | # 20: | 11(C) | 12(N): | 1.181381 |
| # 22: | 12(N) | 13(C): | 1.214597 | # 21: | 11(C) | 23(N): | 0.891774 |
| # 23: | 13(C) | 14(C): | 1.458519 | # 22: | 12(N) | 13(C): | 1.211364 |
| # 24: | 13(C) | 58(H): | 0.855763 | # 23: | 13(C) | 14(C): | 1.484019 |
| # 25: | 14(C) | 31(N): | 0.683312 | # 24: | 13(C) | 54(H): | 0.856607 |
| # 26: | 15(C) | 16(N): | 1.305134 | # 25: | 14(C) | 33(N): | 0.697922 |
| # 27: | 15(C) | 19(C): | 1.274870 | # 26: | 15(C) | 16(N): | 1.417113 |
| # 28: | 15(C) | 37(N): | 0.764849 | # 27: | 15(C) | 19(C): | 1.233349 |
| # 29: | 16(N) | 17(N): | 0.809289 | # 28: | 15(C) | 39(N): | 0.740299 |
| # 30: | 17(N) | 18(C): | 0.931629 | # 29: | 16(N) | 17(N): | 0.624383 |
| # 31: | 18(C) | 19(C): | 1.435643 | # 30: | 17(N) | 18(C): | 0.872286 |
| # 32: | 18(C) | 40(N): | 0.806754 | # 31: | 18(C) | 19(C): | 1.348000 |
| # 33: | 19(C) | 43(N): | 0.735621 | # 32: | 18(C) | 20(N): | 1.219493 |
| # 34: | 20(C) | 21(N): | 1.305137 | # 33: | 19(C) | 42(N): | 0.870772 |
| # 35: | 20(C) | 24(C): | 1.274867 | # 34: | 20(N) | 55(H): | 0.658965 |
| # 36: | 20(C) | 46(N): | 0.764849 | # 35: | 20(N) | 56(H): | 0.659843 |
| # 37: | 21(N) | 22(N): | 0.809284 | # 36: | 21(C) | 22(N): | 1.416820 |
| # 38: | 22(N) | 23(C): | 0.931630 | # 37: | 21(C) | 25(C): | 1.229348 |
| # 39: | 23(C) | 24(C): | 1.435648 | # 38: | 21(C) | 45(N): | 0.743509 |
| # 40: | 23(C) | 49(N): | 0.806752 | # 39: | 22(N) | 23(N): | 0.625296 |
| # 41: | 24(C) | 52(N): | 0.735625 | # 40: | 23(N) | 24(C): | 0.871022 |
| # 42: | 25(N) | 26(O): | 0.970905 | # 41: | 24(C) | 25(C): | 1.348418 |
| # 43: | 25(N) | 27(O): | 0.980586 | # 42: | 24(C) | 26(N): | 1.215701 |
| # 44: | 28(N) | 29(O): | 1.009019 | # 43: | 25(C) | 48(N): | 0.865473 |
| # 45: | 28(N) | 30(O): | 0.888948 | # 44: | 26(N) | 57(H): | 0.659924 |
| # 46: | 31(N) | 32(O): | 1.009013 | # 45: | 26(N) | 58(H): | 0.658726 |
| # 47: | 31(N) | 33(O): | 0.888942 | # 46: | 27(N) | 28(O): | 0.990501 |
| # 48: | 34(N) | 35(O): | 0.970910 | # 47: | 27(N) | 29(O): | 0.970613 |
| # 49: | 34(N) | 36(O): | 0.980596 | # 48: | 30(N) | 31(O): | 0.987210 |
| # 50: | 37(N) | 38(O): | 1.004479 | # 49: | 30(N) | 32(O): | 0.888475 |
| # 51: | 37(N) | 39(O): | 0.954321 | # 50: | 33(N) | 34(O): | 0.989040 |
| # 52: | 40(N) | 41(O): | 0.942647 | # 51: | 33(N) | 35(O): | 0.886903 |
| # 53: | 40(N) | 42(O): | 0.982349 | # 52: | 36(N) | 37(O): | 0.999012 |

---

|                            |       |        |          |                            |       |        |          |
|----------------------------|-------|--------|----------|----------------------------|-------|--------|----------|
| # 54:                      | 43(N) | 44(O): | 1.007482 | # 53:                      | 36(N) | 38(O): | 0.965486 |
| # 55:                      | 43(N) | 45(O): | 1.004207 | # 54:                      | 39(N) | 40(O): | 0.992556 |
| # 56:                      | 46(N) | 47(O): | 1.004476 | # 55:                      | 39(N) | 41(O): | 0.988314 |
| # 57:                      | 46(N) | 48(O): | 0.954322 | # 56:                      | 42(N) | 43(O): | 0.857747 |
| # 58:                      | 49(N) | 50(O): | 0.942645 | # 57:                      | 42(N) | 44(O): | 0.959990 |
| # 59:                      | 49(N) | 51(O): | 0.982349 | # 58:                      | 45(N) | 46(O): | 0.990281 |
| # 60:                      | 52(N) | 53(O): | 1.007480 | # 59:                      | 45(N) | 47(O): | 0.986169 |
| # 61:                      | 52(N) | 54(O): | 1.004214 | # 60:                      | 48(N) | 49(O): | 0.964685 |
|                            |       |        |          | # 61:                      | 48(N) | 50(O): | 0.852359 |
| # 5:                       | 2(N)  | 56(H): | 0.626013 | # 3:                       | 1(N)  | 51(H): | 0.623992 |
| C11                        |       |        |          | C12                        |       |        |          |
| The bond order >= 0.050000 |       |        |          | The bond order >= 0.050000 |       |        |          |
| # 1:                       | 1(N)  | 2(N):  | 0.679191 | # 1:                       | 1(N)  | 2(N):  | 0.671808 |
| # 2:                       | 1(N)  | 3(C):  | 1.025859 | # 2:                       | 1(N)  | 3(C):  | 1.009645 |
| # 3:                       | 1(N)  | 51(H): | 0.628898 | # 3:                       | 1(N)  | 45(H): | 0.624550 |
| # 4:                       | 2(N)  | 4(C):  | 1.025853 | # 4:                       | 2(N)  | 4(C):  | 1.009635 |
| # 5:                       | 2(N)  | 52(H): | 0.628903 | # 5:                       | 2(N)  | 46(H): | 0.624594 |
| # 6:                       | 3(C)  | 5(C):  | 1.317432 | # 6:                       | 3(C)  | 5(C):  | 1.308825 |
| # 7:                       | 3(C)  | 9(C):  | 1.290754 | # 7:                       | 3(C)  | 9(C):  | 1.297421 |
| # 8:                       | 4(C)  | 10(C): | 1.317429 | # 8:                       | 4(C)  | 10(C): | 1.308803 |
| # 9:                       | 4(C)  | 14(C): | 1.290740 | # 9:                       | 4(C)  | 14(C): | 1.297247 |
| # 10:                      | 5(C)  | 6(C):  | 1.454819 | # 10:                      | 5(C)  | 6(C):  | 1.421912 |
| # 11:                      | 5(C)  | 27(N): | 0.648310 | # 11:                      | 5(C)  | 27(N): | 0.652379 |
| # 12:                      | 6(C)  | 7(N):  | 1.257755 | # 12:                      | 6(C)  | 7(N):  | 1.245293 |
| # 13:                      | 6(C)  | 17(N): | 0.781297 | # 13:                      | 6(C)  | 17(N): | 0.822372 |
| # 14:                      | 7(N)  | 8(C):  | 1.226444 | # 14:                      | 7(N)  | 8(C):  | 1.232047 |
| # 15:                      | 8(C)  | 9(C):  | 1.448999 | # 15:                      | 8(C)  | 9(C):  | 1.452206 |
| # 16:                      | 8(C)  | 53(H): | 0.855240 | # 16:                      | 8(C)  | 47(H): | 0.855737 |
| # 17:                      | 9(C)  | 30(N): | 0.695014 | # 17:                      | 9(C)  | 30(N): | 0.693803 |
| # 18:                      | 10(C) | 11(C): | 1.454823 | # 18:                      | 10(C) | 11(C): | 1.421958 |
| # 19:                      | 10(C) | 36(N): | 0.648308 | # 19:                      | 10(C) | 36(N): | 0.652453 |
| # 20:                      | 11(C) | 12(N): | 1.257760 | # 20:                      | 11(C) | 12(N): | 1.245354 |
| # 21:                      | 11(C) | 23(N): | 0.781297 | # 21:                      | 11(C) | 23(N): | 0.822323 |
| # 22:                      | 12(N) | 13(C): | 1.226447 | # 22:                      | 12(N) | 13(C): | 1.232068 |
| # 23:                      | 13(C) | 14(C): | 1.449002 | # 23:                      | 13(C) | 14(C): | 1.452249 |
| # 24:                      | 13(C) | 54(H): | 0.855242 | # 24:                      | 13(C) | 48(H): | 0.855734 |
| # 25:                      | 14(C) | 33(N): | 0.695013 | # 25:                      | 14(C) | 33(N): | 0.693713 |
| # 26:                      | 15(C) | 16(N): | 1.277853 | # 26:                      | 15(C) | 16(N): | 1.405541 |
| # 27:                      | 15(C) | 19(C): | 1.217776 | # 27:                      | 15(C) | 19(N): | 1.074840 |
| # 28:                      | 15(C) | 39(N): | 0.803450 | # 28:                      | 15(C) | 39(N): | 0.741629 |
| # 29:                      | 16(N) | 17(N): | 0.845028 | # 29:                      | 16(N) | 17(N): | 0.651948 |
| # 30:                      | 17(N) | 18(C): | 0.853151 | # 30:                      | 17(N) | 18(C): | 0.867633 |
| # 31:                      | 18(C) | 19(C): | 1.355207 | # 31:                      | 18(C) | 19(N): | 1.293854 |

|                            |       |        |          |                                  |       |        |            |
|----------------------------|-------|--------|----------|----------------------------------|-------|--------|------------|
| # 32:                      | 18(C) | 42(N): | 0.899277 | # 32:                            | 18(C) | 20(N): | 1.085701   |
| # 33:                      | 19(C) | 20(N): | 1.158325 | # 33:                            | 20(N) | 49(H): | 0.665617   |
| # 34:                      | 20(N) | 55(H): | 0.674658 | # 34:                            | 20(N) | 50(H): | 0.675538   |
| # 35:                      | 20(N) | 56(H): | 0.677655 | # 35:                            | 21(C) | 22(N): | 1.405461   |
| # 36:                      | 21(C) | 22(N): | 1.277855 | # 36:                            | 21(C) | 25(N): | 1.074916   |
| # 37:                      | 21(C) | 25(C): | 1.217777 | # 37:                            | 21(C) | 42(N): | 0.741643   |
| # 38:                      | 21(C) | 45(N): | 0.803453 | # 38:                            | 22(N) | 23(N): | 0.651988   |
| # 39:                      | 22(N) | 23(N): | 0.845028 | # 39:                            | 23(N) | 24(C): | 0.867683   |
| # 40:                      | 23(N) | 24(C): | 0.853148 | # 40:                            | 24(C) | 25(N): | 1.293809   |
| # 41:                      | 24(C) | 25(C): | 1.355207 | # 41:                            | 24(C) | 26(N): | 1.085974   |
| # 42:                      | 24(C) | 48(N): | 0.899275 | # 42:                            | 26(N) | 51(H): | 0.665620   |
| # 43:                      | 25(C) | 26(N): | 1.158325 | # 43:                            | 26(N) | 52(H): | 0.675511   |
| # 44:                      | 26(N) | 57(H): | 0.674659 | # 44:                            | 27(N) | 28(O): | 1.018992   |
| # 45:                      | 26(N) | 58(H): | 0.677654 | # 45:                            | 27(N) | 29(O): | 0.916672   |
| # 46:                      | 27(N) | 28(O): | 0.970542 | # 46:                            | 30(N) | 31(O): | 1.000817   |
| # 47:                      | 27(N) | 29(O): | 0.982226 | # 47:                            | 30(N) | 32(O): | 0.888508   |
| # 48:                      | 30(N) | 31(O): | 0.997558 | # 48:                            | 33(N) | 34(O): | 1.000856   |
| # 49:                      | 30(N) | 32(O): | 0.885935 | # 49:                            | 33(N) | 35(O): | 0.888518   |
| # 50:                      | 33(N) | 34(O): | 0.997565 | # 50:                            | 36(N) | 37(O): | 1.019047   |
| # 51:                      | 33(N) | 35(O): | 0.885937 | # 51:                            | 36(N) | 38(O): | 0.916710   |
| # 52:                      | 36(N) | 37(O): | 0.970546 | # 52:                            | 39(N) | 40(O): | 0.980228   |
| # 53:                      | 36(N) | 38(O): | 0.982244 | # 53:                            | 39(N) | 41(O): | 0.970141   |
| # 54:                      | 39(N) | 40(O): | 0.999244 | # 54:                            | 42(N) | 43(O): | 0.980303   |
| # 55:                      | 39(N) | 41(O): | 0.870018 | # 55:                            | 42(N) | 44(O): | 0.970073   |
| # 56:                      | 42(N) | 43(O): | 0.920878 |                                  |       |        |            |
| # 57:                      | 42(N) | 44(O): | 0.870114 | # 3:                             | 1(N)  | 45(H): | 0.624550   |
| # 58:                      | 45(N) | 46(O): | 0.999242 |                                  |       |        |            |
| # 59:                      | 45(N) | 47(O): | 0.870018 |                                  |       |        |            |
| # 60:                      | 48(N) | 49(O): | 0.920881 |                                  |       |        |            |
| # 61:                      | 48(N) | 50(O): | 0.870111 |                                  |       |        |            |
| # 3:                       | 1(N)  | 51(H): | 0.628898 |                                  |       |        |            |
| D1                         |       |        |          | D2                               |       |        |            |
| The bond order >= 0.050000 |       |        |          | The total bond order >= 0.050000 |       |        |            |
| # 1:                       | 1(N)  | 2(N):  | 0.666524 | # 1:                             | 1(N)  | 2(N)   | 1.27609110 |
| # 2:                       | 1(N)  | 3(C):  | 0.997023 | # 2:                             | 1(N)  | 3(C)   | 1.31279477 |
| # 3:                       | 1(N)  | 35(H): | 0.633172 | # 8:                             | 1(N)  | 39(H)  | 0.70236608 |
| # 4:                       | 2(N)  | 4(C):  | 1.015247 | # 10:                            | 2(N)  | 4(C)   | 1.32291334 |
| # 5:                       | 2(N)  | 36(H): | 0.623871 | # 15:                            | 2(N)  | 40(H)  | 0.68747391 |
| # 6:                       | 3(C)  | 5(C):  | 1.345671 | # 16:                            | 3(C)  | 5(C)   | 1.27918663 |
| # 7:                       | 3(C)  | 9(C):  | 1.294997 | # 20:                            | 3(C)  | 9(C)   | 1.22634077 |
| # 8:                       | 4(C)  | 10(C): | 1.331882 | # 23:                            | 4(C)  | 10(C)  | 1.27354282 |
| # 9:                       | 4(C)  | 14(C): | 1.289943 | # 27:                            | 4(C)  | 14(C)  | 1.22504346 |
| # 10:                      | 5(C)  | 6(C):  | 1.406543 | # 30:                            | 5(C)  | 6(C)   | 1.28626258 |

---

|       |       |        |          |       |       |       |            |
|-------|-------|--------|----------|-------|-------|-------|------------|
| # 11: | 5(C)  | 15(N): | 0.662144 | # 34: | 5(C)  | 15(N) | 0.94985307 |
| # 12: | 6(C)  | 7(N):  | 1.193975 | # 38: | 6(C)  | 7(N)  | 1.44406184 |
| # 13: | 6(C)  | 29(C): | 1.254980 | # 42: | 6(C)  | 30(N) | 1.20174609 |
| # 14: | 7(N)  | 8(C):  | 1.199510 | # 45: | 7(N)  | 8(C)  | 1.44447676 |
| # 15: | 8(C)  | 9(C):  | 1.371650 | # 46: | 7(N)  | 9(C)  | 0.08994708 |
| # 16: | 8(C)  | 27(C): | 1.256281 | # 47: | 7(N)  | 27(N) | 0.11205020 |
| # 17: | 9(C)  | 21(N): | 0.694235 | # 48: | 7(N)  | 28(N) | 0.08721032 |
| # 18: | 10(C) | 11(C): | 1.412176 | # 49: | 7(N)  | 30(N) | 0.10598665 |
| # 19: | 10(C) | 18(N): | 0.664454 | # 50: | 7(N)  | 31(N) | 0.07896348 |
| # 20: | 11(C) | 12(N): | 1.190016 | # 51: | 8(C)  | 9(C)  | 1.26695473 |
| # 21: | 11(C) | 31(C): | 1.254276 | # 52: | 8(C)  | 21(N) | 0.05668652 |
| # 22: | 12(N) | 13(C): | 1.202089 | # 53: | 8(C)  | 27(N) | 1.21177884 |
| # 23: | 13(C) | 14(C): | 1.362069 | # 54: | 8(C)  | 28(N) | 0.10885265 |
| # 24: | 13(C) | 33(C): | 1.253879 | # 55: | 8(C)  | 29(N) | 0.06751844 |
| # 25: | 14(C) | 24(N): | 0.687779 | # 56: | 9(C)  | 21(N) | 1.02415311 |
| # 26: | 15(N) | 16(O): | 0.981566 | # 57: | 9(C)  | 22(O) | 0.13403788 |
| # 27: | 15(N) | 17(O): | 0.967661 | # 58: | 9(C)  | 23(O) | 0.13024740 |
| # 28: | 18(N) | 19(O): | 0.977217 | # 59: | 9(C)  | 27(N) | 0.08182754 |
| # 29: | 18(N) | 20(O): | 0.965545 | # 60: | 10(C) | 11(C) | 1.28645283 |
| # 30: | 21(N) | 22(O): | 1.025817 | # 61: | 10(C) | 12(N) | 0.09257508 |
| # 31: | 21(N) | 23(O): | 0.884840 | # 62: | 10(C) | 13(C) | 0.05791237 |
| # 32: | 24(N) | 25(O): | 1.020289 | # 63: | 10(C) | 14(C) | 0.07640062 |
| # 33: | 24(N) | 26(O): | 0.888722 | # 64: | 10(C) | 18(N) | 0.95468325 |
| # 34: | 27(C) | 28(N): | 2.535490 | # 65: | 10(C) | 19(O) | 0.13516799 |
| # 35: | 29(C) | 30(N): | 2.538983 | # 66: | 10(C) | 20(O) | 0.12855789 |
| # 36: | 31(C) | 32(N): | 2.539549 | # 67: | 10(C) | 33(N) | 0.08625500 |
| # 37: | 33(C) | 34(N): | 2.532869 | # 68: | 11(C) | 12(N) | 1.44197091 |
|       |       |        |          | # 69: | 11(C) | 13(C) | 0.10403030 |
|       |       |        |          | # 70: | 11(C) | 14(C) | 0.05623125 |
| # 5:  | 2(N)  | 36(H): | 0.623871 | # 71: | 11(C) | 18(N) | 0.05666548 |
|       |       |        |          | # 72: | 11(C) | 33(N) | 1.20307159 |
|       |       |        |          | # 73: | 11(C) | 34(N) | 0.10785317 |
|       |       |        |          | # 74: | 11(C) | 35(N) | 0.06601538 |
|       |       |        |          | # 75: | 12(N) | 13(C) | 1.44630832 |
|       |       |        |          | # 76: | 12(N) | 14(C) | 0.09017373 |
|       |       |        |          | # 77: | 12(N) | 33(N) | 0.10614926 |
|       |       |        |          | # 78: | 12(N) | 34(N) | 0.07943112 |
|       |       |        |          | # 79: | 12(N) | 36(N) | 0.11281519 |
|       |       |        |          | # 80: | 12(N) | 37(N) | 0.08846393 |
|       |       |        |          | # 81: | 13(C) | 14(C) | 1.26267541 |
|       |       |        |          | # 82: | 13(C) | 24(N) | 0.05770163 |
|       |       |        |          | # 83: | 13(C) | 36(N) | 1.21374235 |
|       |       |        |          | # 84: | 13(C) | 37(N) | 0.10905675 |
|       |       |        |          | # 85: | 13(C) | 38(N) | 0.06785652 |
|       |       |        |          | # 86: | 14(C) | 24(N) | 1.03454965 |

---



|        |       |       |            |
|--------|-------|-------|------------|
| # 87:  | 14(C) | 25(O) | 0.13720640 |
| # 88:  | 14(C) | 26(O) | 0.12800161 |
| # 89:  | 14(C) | 36(N) | 0.08108851 |
| # 90:  | 15(N) | 16(O) | 1.84459401 |
| # 91:  | 15(N) | 17(O) | 1.83703220 |
| # 92:  | 16(O) | 17(O) | 0.43404599 |
| # 93:  | 18(N) | 19(O) | 1.83828002 |
| # 94:  | 18(N) | 20(O) | 1.83398279 |
| # 95:  | 19(O) | 20(O) | 0.43218472 |
| # 96:  | 21(N) | 22(O) | 1.86324266 |
| # 97:  | 21(N) | 23(O) | 1.76021961 |
| # 98:  | 22(O) | 23(O) | 0.40906540 |
| # 99:  | 22(O) | 27(N) | 0.10846874 |
| # 100: | 23(O) | 39(H) | 0.07064729 |
| # 101: | 24(N) | 25(O) | 1.85519994 |
| # 102: | 24(N) | 26(O) | 1.75989813 |
| # 103: | 25(O) | 26(O) | 0.40686012 |
| # 104: | 25(O) | 36(N) | 0.11472374 |
| # 105: | 26(O) | 40(H) | 0.07770926 |
| # 106: | 27(N) | 28(N) | 1.67397052 |
| # 107: | 27(N) | 29(N) | 0.40605626 |
| # 108: | 28(N) | 29(N) | 2.56175831 |
| # 109: | 30(N) | 31(N) | 1.67522454 |
| # 110: | 30(N) | 32(N) | 0.40571957 |
| # 111: | 31(N) | 32(N) | 2.56759490 |
| # 112: | 33(N) | 34(N) | 1.67373737 |
| # 113: | 33(N) | 35(N) | 0.40480211 |
| # 114: | 34(N) | 35(N) | 2.56788238 |
| # 115: | 36(N) | 37(N) | 1.67149410 |
| # 116: | 36(N) | 38(N) | 0.40475763 |
| # 117: | 37(N) | 38(N) | 2.56247032 |
| # 15:  | 2(N)  | 40(H) | 0.68747391 |

| D3                         |      |        |          | D4                         |      |        |          |
|----------------------------|------|--------|----------|----------------------------|------|--------|----------|
| The bond order >= 0.050000 |      |        |          | The bond order >= 0.050000 |      |        |          |
| # 1:                       | 1(N) | 2(N):  | 0.672250 | # 1:                       | 1(N) | 2(N):  | 0.672861 |
| # 2:                       | 1(N) | 3(C):  | 0.984381 | # 2:                       | 1(N) | 3(C):  | 1.054687 |
| # 3:                       | 1(N) | 39(H): | 0.642351 | # 3:                       | 1(N) | 31(H): | 0.610916 |
| # 4:                       | 2(N) | 4(C):  | 1.003155 | # 4:                       | 2(N) | 4(C):  | 1.070347 |
| # 5:                       | 2(N) | 40(H): | 0.634647 | # 5:                       | 2(N) | 32(H): | 0.604794 |
| # 6:                       | 3(C) | 5(C):  | 1.338140 | # 6:                       | 3(C) | 5(C):  | 1.277965 |
| # 7:                       | 3(C) | 9(C):  | 1.287983 | # 7:                       | 3(C) | 9(C):  | 1.242196 |
| # 8:                       | 4(C) | 10(C): | 1.324693 | # 8:                       | 4(C) | 10(C): | 1.309337 |
| # 9:                       | 4(C) | 14(C): | 1.281109 | # 9:                       | 4(C) | 14(C): | 1.227982 |

|                            |       |        |          |                            |       |        |          |
|----------------------------|-------|--------|----------|----------------------------|-------|--------|----------|
| # 10:                      | 5(C)  | 6(C):  | 1.393313 | # 10:                      | 5(C)  | 6(C):  | 1.252976 |
| # 11:                      | 5(C)  | 15(N): | 0.641852 | # 11:                      | 5(C)  | 19(N): | 0.749478 |
| # 12:                      | 6(C)  | 7(N):  | 1.258840 | # 12:                      | 6(C)  | 7(N):  | 1.178905 |
| # 13:                      | 6(C)  | 30(N): | 0.859248 | # 13:                      | 6(C)  | 16(N): | 1.179148 |
| # 14:                      | 7(N)  | 8(C):  | 1.255437 | # 14:                      | 7(N)  | 8(C):  | 1.175541 |
| # 15:                      | 8(C)  | 9(C):  | 1.409566 | # 15:                      | 8(C)  | 9(C):  | 1.217496 |
| # 16:                      | 8(C)  | 27(N): | 0.830183 | # 16:                      | 8(C)  | 15(N): | 1.187854 |
| # 17:                      | 9(C)  | 21(N): | 0.675325 | # 17:                      | 9(C)  | 25(N): | 0.787731 |
| # 18:                      | 10(C) | 11(C): | 1.398283 | # 18:                      | 10(C) | 11(C): | 1.252142 |
| # 19:                      | 10(C) | 18(N): | 0.643106 | # 19:                      | 10(C) | 22(N): | 0.764634 |
| # 20:                      | 11(C) | 12(N): | 1.243882 | # 20:                      | 11(C) | 12(N): | 1.177271 |
| # 21:                      | 11(C) | 33(N): | 0.864640 | # 21:                      | 11(C) | 17(N): | 1.187155 |
| # 22:                      | 12(N) | 13(C): | 1.258053 | # 22:                      | 12(N) | 13(C): | 1.185306 |
| # 23:                      | 13(C) | 14(C): | 1.401634 | # 23:                      | 13(C) | 14(C): | 1.217658 |
| # 24:                      | 13(C) | 36(N): | 0.829491 | # 24:                      | 13(C) | 18(N): | 1.186605 |
| # 25:                      | 14(C) | 24(N): | 0.684070 | # 25:                      | 14(C) | 28(N): | 0.801798 |
| # 26:                      | 15(N) | 16(O): | 0.976870 | # 26:                      | 15(N) | 33(H): | 0.661374 |
| # 27:                      | 15(N) | 17(O): | 0.982057 | # 27:                      | 15(N) | 34(H): | 0.683727 |
| # 28:                      | 18(N) | 19(O): | 0.987909 | # 28:                      | 16(N) | 35(H): | 0.682788 |
| # 29:                      | 18(N) | 20(O): | 0.977986 | # 29:                      | 16(N) | 36(H): | 0.666858 |
| # 30:                      | 21(N) | 22(O): | 1.044788 | # 30:                      | 17(N) | 37(H): | 0.684723 |
| # 31:                      | 21(N) | 23(O): | 0.896059 | # 31:                      | 17(N) | 38(H): | 0.667329 |
| # 32:                      | 24(N) | 25(O): | 1.027007 | # 32:                      | 18(N) | 39(H): | 0.663469 |
| # 33:                      | 24(N) | 26(O): | 0.896472 | # 33:                      | 18(N) | 40(H): | 0.687295 |
| # 34:                      | 27(N) | 28(F): | 0.145374 | # 34:                      | 19(N) | 20(O): | 0.855665 |
| # 35:                      | 27(N) | 29(F): | 0.153082 | # 35:                      | 19(N) | 21(O): | 0.913335 |
| # 36:                      | 30(N) | 31(F): | 0.175521 | # 36:                      | 22(N) | 23(O): | 0.884102 |
| # 37:                      | 30(N) | 32(F): | 0.140017 | # 37:                      | 22(N) | 24(O): | 0.866622 |
| # 38:                      | 33(N) | 34(F): | 0.176742 | # 38:                      | 25(N) | 26(O): | 0.861250 |
| # 39:                      | 33(N) | 35(F): | 0.139845 | # 39:                      | 25(N) | 27(O): | 0.874833 |
| # 40:                      | 36(N) | 37(F): | 0.150736 | # 40:                      | 28(N) | 29(O): | 0.871623 |
| # 41:                      | 36(N) | 38(F): | 0.149687 | # 41:                      | 28(N) | 30(O): | 0.818579 |
| # 39:                      | 33(N) | 35(F): | 0.139845 | # 5:                       | 2(N)  | 32(H): | 0.604794 |
| D5                         |       |        |          | D6                         |       |        |          |
| The bond order >= 0.050000 |       |        |          | The bond order >= 0.050000 |       |        |          |
| # 1:                       | 1(N)  | 2(N):  | 0.662897 | # 1:                       | 1(N)  | 2(N):  | 0.673893 |
| # 2:                       | 1(N)  | 3(C):  | 1.032068 | # 2:                       | 1(N)  | 3(C):  | 1.059377 |
| # 3:                       | 1(N)  | 43(H): | 0.618647 | # 3:                       | 1(N)  | 35(H): | 0.606219 |
| # 4:                       | 2(N)  | 4(C):  | 1.052951 | # 4:                       | 2(N)  | 4(C):  | 1.074314 |
| # 5:                       | 2(N)  | 44(H): | 0.614765 | # 5:                       | 2(N)  | 36(H): | 0.602676 |
| # 6:                       | 3(C)  | 5(C):  | 1.304598 | # 6:                       | 3(C)  | 5(C):  | 1.269859 |
| # 7:                       | 3(C)  | 9(C):  | 1.262178 | # 7:                       | 3(C)  | 9(C):  | 1.242272 |
| # 8:                       | 4(C)  | 10(C): | 1.310448 | # 8:                       | 4(C)  | 10(C): | 1.304688 |

|       |       |        |          |       |       |        |          |
|-------|-------|--------|----------|-------|-------|--------|----------|
| # 9:  | 4(C)  | 14(C): | 1.241420 | # 9:  | 4(C)  | 14(C): | 1.227828 |
| # 10: | 5(C)  | 6(C):  | 1.311945 | # 10: | 5(C)  | 6(C):  | 1.236387 |
| # 11: | 5(C)  | 15(N): | 0.698910 | # 11: | 5(C)  | 15(N): | 0.750663 |
| # 12: | 6(C)  | 7(N):  | 1.226028 | # 12: | 6(C)  | 7(N):  | 1.161124 |
| # 13: | 6(C)  | 31(N): | 0.981853 | # 13: | 6(C)  | 29(N): | 1.136236 |
| # 14: | 7(N)  | 8(C):  | 1.229017 | # 14: | 7(N)  | 8(C):  | 1.161273 |
| # 15: | 8(C)  | 9(C):  | 1.231721 | # 15: | 8(C)  | 9(C):  | 1.200101 |
| # 16: | 8(C)  | 27(N): | 1.012174 | # 16: | 8(C)  | 27(N): | 1.138269 |
| # 17: | 9(C)  | 21(N): | 0.747196 | # 17: | 9(C)  | 21(N): | 0.791702 |
| # 18: | 10(C) | 11(C): | 1.294969 | # 18: | 10(C) | 11(C): | 1.235591 |
| # 19: | 10(C) | 18(N): | 0.730315 | # 19: | 10(C) | 18(N): | 0.772068 |
| # 20: | 11(C) | 12(N): | 1.229901 | # 20: | 11(C) | 12(N): | 1.159651 |
| # 21: | 11(C) | 35(N): | 1.000827 | # 21: | 11(C) | 31(N): | 1.146952 |
| # 22: | 12(N) | 13(C): | 1.244694 | # 22: | 12(N) | 13(C): | 1.170258 |
| # 23: | 13(C) | 14(C): | 1.220722 | # 23: | 13(C) | 14(C): | 1.197520 |
| # 24: | 13(C) | 39(N): | 1.013390 | # 24: | 13(C) | 33(N): | 1.136794 |
| # 25: | 14(C) | 24(N): | 0.754465 | # 25: | 14(C) | 24(N): | 0.809165 |
| # 26: | 15(N) | 16(O): | 0.898961 | # 26: | 15(N) | 16(O): | 0.852752 |
| # 27: | 15(N) | 17(O): | 0.952295 | # 27: | 15(N) | 17(O): | 0.900834 |
| # 28: | 18(N) | 19(O): | 0.917486 | # 28: | 18(N) | 19(O): | 0.883001 |
| # 29: | 18(N) | 20(O): | 0.902440 | # 29: | 18(N) | 20(O): | 0.861829 |
| # 30: | 21(N) | 22(O): | 0.901811 | # 30: | 21(N) | 22(O): | 0.857616 |
| # 31: | 21(N) | 23(O): | 0.906722 | # 31: | 21(N) | 23(O): | 0.870530 |
| # 32: | 24(N) | 25(O): | 0.902759 | # 32: | 24(N) | 25(O): | 0.871234 |
| # 33: | 24(N) | 26(O): | 0.861444 | # 33: | 24(N) | 26(O): | 0.811770 |
| # 34: | 27(N) | 28(N): | 0.542486 | # 34: | 27(N) | 28(N): | 0.615317 |
| # 35: | 27(N) | 45(H): | 0.638113 | # 35: | 27(N) | 37(H): | 0.658145 |
| # 36: | 28(N) | 29(O): | 0.982883 | # 36: | 28(N) | 38(H): | 0.690135 |
| # 37: | 28(N) | 30(O): | 1.062426 | # 37: | 28(N) | 39(H): | 0.690447 |
| # 38: | 31(N) | 32(N): | 0.532041 | # 38: | 29(N) | 30(N): | 0.624704 |
| # 39: | 31(N) | 46(H): | 0.655015 | # 39: | 29(N) | 40(H): | 0.663371 |
| # 40: | 32(N) | 33(O): | 0.990457 | # 40: | 30(N) | 41(H): | 0.692765 |
| # 41: | 32(N) | 34(O): | 1.057446 | # 41: | 30(N) | 42(H): | 0.693440 |
| # 42: | 35(N) | 36(N): | 0.544582 | # 42: | 31(N) | 32(N): | 0.618488 |
| # 43: | 35(N) | 47(H): | 0.644354 | # 43: | 31(N) | 43(H): | 0.663910 |
| # 44: | 36(N) | 37(O): | 0.988359 | # 44: | 32(N) | 44(H): | 0.693492 |
| # 45: | 36(N) | 38(O): | 1.045883 | # 45: | 32(N) | 45(H): | 0.695301 |
| # 46: | 39(N) | 40(N): | 0.530515 | # 46: | 33(N) | 34(N): | 0.619259 |
| # 47: | 39(N) | 48(H): | 0.638951 | # 47: | 33(N) | 46(H): | 0.658259 |
| # 48: | 40(N) | 41(O): | 0.975925 | # 48: | 34(N) | 47(H): | 0.690190 |
| # 49: | 40(N) | 42(O): | 1.063994 | # 49: | 34(N) | 48(H): | 0.692957 |
| # 46: | 39(N) | 40(N): | 0.530515 | # 5:  | 2(N)  | 36(H): | 0.602676 |

D7

D8

---

The bond order >= 0.050000

# 1: 1(N) 2(N): 0.651558  
# 2: 1(N) 3(C): 1.017481  
# 3: 1(N) 55(H): 0.631824  
# 4: 2(N) 4(C): 1.018531  
# 5: 2(N) 56(H): 0.639469  
# 6: 3(C) 5(C): 1.338826  
# 7: 3(C) 9(C): 1.278588  
# 8: 4(C) 10(C): 1.325282  
# 9: 4(C) 14(C): 1.289369  
# 10: 5(C) 6(C): 1.412544  
# 11: 5(C) 15(N): 0.685670  
# 12: 6(C) 7(N): 1.205647  
# 13: 6(C) 34(C): 1.025124  
# 14: 7(N) 8(C): 1.214831  
# 15: 8(C) 9(C): 1.386362  
# 16: 8(C) 27(C): 1.030299  
# 17: 9(C) 21(N): 0.697502  
# 18: 10(C) 11(C): 1.443097  
# 19: 10(C) 18(N): 0.675587  
# 20: 11(C) 12(N): 1.197792  
# 21: 11(C) 41(C): 1.044985  
# 22: 12(N) 13(C): 1.221152  
# 23: 13(C) 14(C): 1.357277  
# 24: 13(C) 48(C): 1.022739  
# 25: 14(C) 24(N): 0.687801  
# 26: 15(N) 16(O): 0.975977  
# 27: 15(N) 17(O): 0.959952  
# 28: 18(N) 19(O): 0.944869  
# 29: 18(N) 20(O): 0.964023  
# 30: 21(N) 22(O): 0.979962  
# 31: 21(N) 23(O): 0.909069  
# 32: 24(N) 25(O): 0.977770  
# 33: 24(N) 26(O): 0.919370  
# 34: 27(C) 28(N): 0.537938  
# 35: 27(C) 31(N): 0.544669  
# 36: 27(C) 57(H): 0.836516  
# 37: 28(N) 29(O): 0.988263  
# 38: 28(N) 30(O): 1.027233  
# 39: 31(N) 32(O): 0.987569  
# 40: 31(N) 33(O): 1.031226  
# 41: 34(C) 35(N): 0.525927  
# 42: 34(C) 38(N): 0.552746  
# 43: 34(C) 58(H): 0.830037  
# 44: 35(N) 36(O): 0.979904

The bond order >= 0.050000

# 1: 1(N) 2(N): 0.689911  
# 2: 1(N) 3(C): 1.029439  
# 3: 1(N) 67(H): 0.618802  
# 4: 2(N) 4(C): 1.029445  
# 5: 2(N) 68(H): 0.618800  
# 6: 3(C) 5(C): 1.295882  
# 7: 3(C) 9(C): 1.276190  
# 8: 4(C) 10(C): 1.295889  
# 9: 4(C) 14(C): 1.276189  
# 10: 5(C) 6(C): 1.406223  
# 11: 5(C) 15(N): 0.668630  
# 12: 6(C) 7(N): 1.187610  
# 13: 6(C) 37(C): 0.993905  
# 14: 7(N) 8(C): 1.214016  
# 15: 8(C) 9(C): 1.377713  
# 16: 8(C) 27(C): 0.998210  
# 17: 9(C) 21(N): 0.699445  
# 18: 10(C) 11(C): 1.406227  
# 19: 10(C) 18(N): 0.668632  
# 20: 11(C) 12(N): 1.187611  
# 21: 11(C) 47(C): 0.993913  
# 22: 12(N) 13(C): 1.214010  
# 23: 13(C) 14(C): 1.377714  
# 24: 13(C) 57(C): 0.998209  
# 25: 14(C) 24(N): 0.699442  
# 26: 15(N) 16(O): 1.002891  
# 27: 15(N) 17(O): 0.952013  
# 28: 18(N) 19(O): 1.002888  
# 29: 18(N) 20(O): 0.952013  
# 30: 21(N) 22(O): 0.987297  
# 31: 21(N) 23(O): 0.915541  
# 32: 24(N) 25(O): 0.987299  
# 33: 24(N) 26(O): 0.915541  
# 34: 27(C) 28(N): 0.447731  
# 35: 27(C) 31(N): 0.477637  
# 36: 27(C) 34(N): 0.516419  
# 37: 28(N) 29(O): 1.028678  
# 38: 28(N) 30(O): 1.050200  
# 39: 31(N) 32(O): 0.997153  
# 40: 31(N) 33(O): 1.077773  
# 41: 34(N) 35(O): 1.047626  
# 42: 34(N) 36(O): 0.975308  
# 43: 37(C) 38(N): 0.456829

---

|                            |       |        |          |                            |       |        |          |
|----------------------------|-------|--------|----------|----------------------------|-------|--------|----------|
| # 45:                      | 35(N) | 37(O): | 1.033070 | # 44:                      | 37(C) | 41(N): | 0.530701 |
| # 46:                      | 38(N) | 39(O): | 1.004179 | # 45:                      | 37(C) | 44(N): | 0.450752 |
| # 47:                      | 38(N) | 40(O): | 1.014376 | # 46:                      | 38(N) | 39(O): | 0.992789 |
| # 48:                      | 41(C) | 42(N): | 0.529233 | # 47:                      | 38(N) | 40(O): | 1.072050 |
| # 49:                      | 41(C) | 45(N): | 0.543283 | # 48:                      | 41(N) | 42(O): | 0.982580 |
| # 50:                      | 41(C) | 59(H): | 0.832047 | # 49:                      | 41(N) | 43(O): | 1.048642 |
| # 51:                      | 42(N) | 43(O): | 0.992927 | # 50:                      | 44(N) | 45(O): | 1.025825 |
| # 52:                      | 42(N) | 44(O): | 1.028189 | # 51:                      | 44(N) | 46(O): | 1.041989 |
| # 53:                      | 45(N) | 46(O): | 0.992753 | # 52:                      | 47(C) | 48(N): | 0.456834 |
| # 54:                      | 45(N) | 47(O): | 1.038829 | # 53:                      | 47(C) | 51(N): | 0.530703 |
| # 55:                      | 48(C) | 49(N): | 0.541644 | # 54:                      | 47(C) | 54(N): | 0.450751 |
| # 56:                      | 48(C) | 52(N): | 0.543245 | # 55:                      | 48(N) | 49(O): | 0.992785 |
| # 57:                      | 48(C) | 60(H): | 0.835832 | # 56:                      | 48(N) | 50(O): | 1.072054 |
| # 58:                      | 49(N) | 50(O): | 0.987258 | # 57:                      | 51(N) | 52(O): | 0.982582 |
| # 59:                      | 49(N) | 51(O): | 1.023343 | # 58:                      | 51(N) | 53(O): | 1.048640 |
| # 60:                      | 52(N) | 53(O): | 0.991917 | # 59:                      | 54(N) | 55(O): | 1.025834 |
| # 61:                      | 52(N) | 54(O): | 1.024470 | # 60:                      | 54(N) | 56(O): | 1.042006 |
| # 41:                      | 34(C) | 35(N): | 0.525927 | # 61:                      | 57(C) | 58(N): | 0.447736 |
|                            |       |        |          | # 62:                      | 57(C) | 61(N): | 0.477633 |
|                            |       |        |          | # 63:                      | 57(C) | 64(N): | 0.516421 |
|                            |       |        |          | # 64:                      | 58(N) | 59(O): | 1.028680 |
|                            |       |        |          | # 65:                      | 58(N) | 60(O): | 1.050198 |
|                            |       |        |          | # 66:                      | 61(N) | 62(O): | 0.997149 |
|                            |       |        |          | # 67:                      | 61(N) | 63(O): | 1.077776 |
|                            |       |        |          | # 68:                      | 64(N) | 65(O): | 1.047623 |
|                            |       |        |          | # 69:                      | 64(N) | 66(O): | 0.975313 |
|                            |       |        |          | # 34:                      | 27(C) | 28(N): | 0.447731 |
| <hr/>                      |       |        |          | <hr/>                      |       |        |          |
| D9                         |       |        |          | D10                        |       |        |          |
| The bond order >= 0.050000 |       |        |          | The bond order >= 0.050000 |       |        |          |
| # 1:                       | 1(N)  | 2(N):  | 0.659003 | # 1:                       | 1(N)  | 2(N):  | 0.676390 |
| # 2:                       | 1(N)  | 3(C):  | 1.046953 | # 2:                       | 1(N)  | 3(C):  | 1.013252 |
| # 3:                       | 1(N)  | 83(H): | 0.626190 | # 3:                       | 1(N)  | 75(H): | 0.629141 |
| # 4:                       | 2(N)  | 4(C):  | 1.022771 | # 4:                       | 2(N)  | 4(C):  | 0.993110 |
| # 5:                       | 2(N)  | 84(H): | 0.636855 | # 5:                       | 2(N)  | 76(H): | 0.636911 |
| # 6:                       | 3(C)  | 5(C):  | 1.316108 | # 6:                       | 3(C)  | 5(C):  | 1.309098 |
| # 7:                       | 3(C)  | 9(C):  | 1.278518 | # 7:                       | 3(C)  | 9(C):  | 1.268415 |
| # 8:                       | 4(C)  | 10(C): | 1.324314 | # 8:                       | 4(C)  | 10(C): | 1.327219 |
| # 9:                       | 4(C)  | 14(C): | 1.291913 | # 9:                       | 4(C)  | 14(C): | 1.237896 |
| # 10:                      | 5(C)  | 6(C):  | 1.461135 | # 10:                      | 5(C)  | 6(C):  | 1.395694 |
| # 11:                      | 5(C)  | 35(N): | 0.679244 | # 11:                      | 5(C)  | 39(N): | 0.652285 |
| # 12:                      | 6(C)  | 7(N):  | 1.251951 | # 12:                      | 6(C)  | 7(N):  | 1.176806 |
| # 13:                      | 6(C)  | 17(N): | 0.762216 | # 13:                      | 6(C)  | 17(N): | 0.887331 |
| # 14:                      | 7(N)  | 8(C):  | 1.267755 | # 14:                      | 7(N)  | 8(C):  | 1.181259 |

---

|       |       |        |          |       |       |        |          |
|-------|-------|--------|----------|-------|-------|--------|----------|
| # 15: | 8(C)  | 9(C):  | 1.420275 | # 15: | 8(C)  | 9(C):  | 1.409520 |
| # 16: | 8(C)  | 27(N): | 0.794772 | # 16: | 8(C)  | 29(N): | 0.905421 |
| # 17: | 9(C)  | 41(N): | 0.676302 | # 17: | 9(C)  | 45(N): | 0.690926 |
| # 18: | 10(C) | 11(C): | 1.460829 | # 18: | 10(C) | 11(C): | 1.369314 |
| # 19: | 10(C) | 38(N): | 0.668147 | # 19: | 10(C) | 42(N): | 0.646102 |
| # 20: | 11(C) | 12(N): | 1.258833 | # 20: | 11(C) | 12(N): | 1.194238 |
| # 21: | 11(C) | 32(N): | 0.774414 | # 21: | 11(C) | 35(N): | 0.926167 |
| # 22: | 12(N) | 13(C): | 1.268010 | # 22: | 12(N) | 13(C): | 1.247561 |
| # 23: | 13(C) | 14(C): | 1.418414 | # 23: | 13(C) | 14(C): | 1.392265 |
| # 24: | 13(C) | 22(N): | 0.805098 | # 24: | 13(C) | 23(N): | 0.857015 |
| # 25: | 14(C) | 44(N): | 0.689130 | # 25: | 14(C) | 48(N): | 0.685545 |
| # 26: | 15(C) | 16(N): | 1.312038 | # 26: | 15(C) | 16(N): | 1.412256 |
| # 27: | 15(C) | 19(C): | 1.276327 | # 27: | 15(C) | 19(C): | 1.228899 |
| # 28: | 15(C) | 47(N): | 0.760552 | # 28: | 15(C) | 51(N): | 0.742176 |
| # 29: | 16(N) | 17(N): | 0.812566 | # 29: | 16(N) | 17(N): | 0.623000 |
| # 30: | 17(N) | 18(C): | 0.910700 | # 30: | 17(N) | 18(C): | 0.887761 |
| # 31: | 18(C) | 19(C): | 1.436380 | # 31: | 18(C) | 19(C): | 1.363686 |
| # 32: | 18(C) | 50(N): | 0.811027 | # 32: | 18(C) | 20(N): | 1.176741 |
| # 33: | 19(C) | 53(N): | 0.728324 | # 33: | 19(C) | 54(N): | 0.856023 |
| # 34: | 20(C) | 21(N): | 1.311286 | # 34: | 20(N) | 77(H): | 0.676541 |
| # 35: | 20(C) | 24(C): | 1.266109 | # 35: | 20(N) | 78(H): | 0.655414 |
| # 36: | 20(C) | 56(N): | 0.758954 | # 36: | 21(C) | 22(N): | 1.417703 |
| # 37: | 21(N) | 22(N): | 0.797768 | # 37: | 21(C) | 25(C): | 1.228619 |
| # 38: | 22(N) | 23(C): | 0.929873 | # 38: | 21(C) | 57(N): | 0.743824 |
| # 39: | 23(C) | 24(C): | 1.445448 | # 39: | 22(N) | 23(N): | 0.611513 |
| # 40: | 23(C) | 59(N): | 0.802085 | # 40: | 23(N) | 24(C): | 0.923775 |
| # 41: | 24(C) | 62(N): | 0.734819 | # 41: | 24(C) | 25(C): | 1.357153 |
| # 42: | 25(C) | 26(N): | 1.308380 | # 42: | 24(C) | 26(N): | 1.157929 |
| # 43: | 25(C) | 29(C): | 1.270264 | # 43: | 25(C) | 60(N): | 0.857447 |
| # 44: | 25(C) | 65(N): | 0.757833 | # 44: | 26(N) | 79(H): | 0.679468 |
| # 45: | 26(N) | 27(N): | 0.805423 | # 45: | 26(N) | 80(H): | 0.652734 |
| # 46: | 27(N) | 28(C): | 0.935151 | # 46: | 27(C) | 28(N): | 1.426652 |
| # 47: | 28(C) | 29(C): | 1.439049 | # 47: | 27(C) | 31(C): | 1.219336 |
| # 48: | 28(C) | 68(N): | 0.805210 | # 48: | 27(C) | 63(N): | 0.745251 |
| # 49: | 29(C) | 71(N): | 0.733699 | # 49: | 28(N) | 29(N): | 0.616290 |
| # 50: | 30(C) | 31(N): | 1.307339 | # 50: | 29(N) | 30(C): | 0.892268 |
| # 51: | 30(C) | 34(C): | 1.271668 | # 51: | 30(C) | 31(C): | 1.364025 |
| # 52: | 30(C) | 74(N): | 0.760561 | # 52: | 30(C) | 32(N): | 1.183872 |
| # 53: | 31(N) | 32(N): | 0.792783 | # 53: | 31(C) | 66(N): | 0.859050 |
| # 54: | 32(N) | 33(C): | 0.915571 | # 54: | 32(N) | 81(H): | 0.675493 |
| # 55: | 33(C) | 34(C): | 1.443099 | # 55: | 32(N) | 82(H): | 0.655997 |
| # 56: | 33(C) | 77(N): | 0.812000 | # 56: | 33(C) | 34(N): | 1.418038 |
| # 57: | 34(C) | 80(N): | 0.729958 | # 57: | 33(C) | 37(C): | 1.234988 |
| # 58: | 35(N) | 36(O): | 0.945336 | # 58: | 33(C) | 69(N): | 0.744594 |
| # 59: | 35(N) | 37(O): | 0.996171 | # 59: | 34(N) | 35(N): | 0.619090 |

---

|                            |       |        |          |                            |       |        |          |
|----------------------------|-------|--------|----------|----------------------------|-------|--------|----------|
| # 60:                      | 38(N) | 39(O): | 0.971708 | # 60:                      | 35(N) | 36(C): | 0.855752 |
| # 61:                      | 38(N) | 40(O): | 0.964404 | # 61:                      | 36(C) | 37(C): | 1.345618 |
| # 62:                      | 41(N) | 42(O): | 1.016323 | # 62:                      | 36(C) | 38(N): | 1.224046 |
| # 63:                      | 41(N) | 43(O): | 0.893602 | # 63:                      | 37(C) | 72(N): | 0.866183 |
| # 64:                      | 44(N) | 45(O): | 1.004689 | # 64:                      | 38(N) | 83(H): | 0.656592 |
| # 65:                      | 44(N) | 46(O): | 0.924043 | # 65:                      | 38(N) | 84(H): | 0.662889 |
| # 66:                      | 47(N) | 48(O): | 1.006962 | # 66:                      | 39(N) | 40(O): | 0.983340 |
| # 67:                      | 47(N) | 49(O): | 0.955211 | # 67:                      | 39(N) | 41(O): | 0.967988 |
| # 68:                      | 50(N) | 51(O): | 0.923713 | # 68:                      | 42(N) | 43(O): | 1.002862 |
| # 69:                      | 50(N) | 52(O): | 0.992697 | # 69:                      | 42(N) | 44(O): | 0.965978 |
| # 70:                      | 53(N) | 54(O): | 1.013990 | # 70:                      | 45(N) | 46(O): | 1.010573 |
| # 71:                      | 53(N) | 55(O): | 1.011765 | # 71:                      | 45(N) | 47(O): | 0.902349 |
| # 72:                      | 56(N) | 57(O): | 1.005547 | # 72:                      | 48(N) | 49(O): | 1.029378 |
| # 73:                      | 56(N) | 58(O): | 0.963198 | # 73:                      | 48(N) | 50(O): | 0.877880 |
| # 74:                      | 59(N) | 60(O): | 0.938595 | # 74:                      | 51(N) | 52(O): | 0.999597 |
| # 75:                      | 59(N) | 61(O): | 0.986311 | # 75:                      | 51(N) | 53(O): | 0.990994 |
| # 76:                      | 62(N) | 63(O): | 1.010811 | # 76:                      | 54(N) | 55(O): | 0.857726 |
| # 77:                      | 62(N) | 64(O): | 1.004215 | # 77:                      | 54(N) | 56(O): | 0.979459 |
| # 78:                      | 65(N) | 66(O): | 1.002569 | # 78:                      | 57(N) | 58(O): | 0.991314 |
| # 79:                      | 65(N) | 67(O): | 0.957393 | # 79:                      | 57(N) | 59(O): | 0.981554 |
| # 80:                      | 68(N) | 69(O): | 0.943932 | # 80:                      | 60(N) | 61(O): | 0.858512 |
| # 81:                      | 68(N) | 70(O): | 0.985635 | # 81:                      | 60(N) | 62(O): | 0.977001 |
| # 82:                      | 71(N) | 72(O): | 1.005420 | # 82:                      | 63(N) | 64(O): | 0.997165 |
| # 83:                      | 71(N) | 73(O): | 1.005128 | # 83:                      | 63(N) | 65(O): | 0.987599 |
| # 84:                      | 74(N) | 75(O): | 1.004667 | # 84:                      | 66(N) | 67(O): | 0.968086 |
| # 85:                      | 74(N) | 76(O): | 0.952729 | # 85:                      | 66(N) | 68(O): | 0.852971 |
| # 86:                      | 77(N) | 78(O): | 0.930094 | # 86:                      | 69(N) | 70(O): | 1.003465 |
| # 87:                      | 77(N) | 79(O): | 0.995631 | # 87:                      | 69(N) | 71(O): | 0.991073 |
| # 88:                      | 80(N) | 81(O): | 1.018942 | # 88:                      | 72(N) | 73(O): | 0.957091 |
| # 89:                      | 80(N) | 82(O): | 1.010522 | # 89:                      | 72(N) | 74(O): | 0.867287 |
| # 5:                       | 2(N)  | 84(H): | 0.636855 | # 39:                      | 22(N) | 23(N): | 0.611513 |
| D11                        |       |        |          | D12                        |       |        |          |
| The bond order >= 0.050000 |       |        |          | The bond order >= 0.050000 |       |        |          |
| # 1:                       | 1(N)  | 2(N):  | 0.677090 | # 1:                       | 1(N)  | 2(N):  | 0.675806 |
| # 2:                       | 1(N)  | 3(C):  | 1.027756 | # 2:                       | 1(N)  | 3(C):  | 0.994185 |
| # 3:                       | 1(N)  | 75(H): | 0.624677 | # 3:                       | 1(N)  | 63(H): | 0.635493 |
| # 4:                       | 2(N)  | 4(C):  | 1.010781 | # 4:                       | 2(N)  | 4(C):  | 0.994177 |
| # 5:                       | 2(N)  | 76(H): | 0.623698 | # 5:                       | 2(N)  | 64(H): | 0.635463 |
| # 6:                       | 3(C)  | 5(C):  | 1.313979 | # 6:                       | 3(C)  | 5(C):  | 1.302676 |
| # 7:                       | 3(C)  | 9(C):  | 1.270068 | # 7:                       | 3(C)  | 9(C):  | 1.311017 |
| # 8:                       | 4(C)  | 10(C): | 1.319790 | # 8:                       | 4(C)  | 10(C): | 1.302598 |
| # 9:                       | 4(C)  | 14(C): | 1.282035 | # 9:                       | 4(C)  | 14(C): | 1.311065 |
| # 10:                      | 5(C)  | 6(C):  | 1.442829 | # 10:                      | 5(C)  | 6(C):  | 1.426465 |

---

|       |       |       |            |       |       |       |            |
|-------|-------|-------|------------|-------|-------|-------|------------|
| # 11: | 5(C)  | 39(N) | : 0.642243 | # 11: | 5(C)  | 39(N) | : 0.642458 |
| # 12: | 6(C)  | 7(N)  | : 1.222712 | # 12: | 6(C)  | 7(N)  | : 1.221258 |
| # 13: | 6(C)  | 17(N) | : 0.825418 | # 13: | 6(C)  | 17(N) | : 0.828553 |
| # 14: | 7(N)  | 8(C)  | : 1.291839 | # 14: | 7(N)  | 8(C)  | : 1.209452 |
| # 15: | 8(C)  | 9(C)  | : 1.405879 | # 15: | 8(C)  | 9(C)  | : 1.369581 |
| # 16: | 8(C)  | 29(N) | : 0.789313 | # 16: | 8(C)  | 35(N) | : 0.941598 |
| # 17: | 9(C)  | 45(N) | : 0.695417 | # 17: | 9(C)  | 45(N) | : 0.683496 |
| # 18: | 10(C) | 11(C) | : 1.449368 | # 18: | 10(C) | 11(C) | : 1.426479 |
| # 19: | 10(C) | 42(N) | : 0.647384 | # 19: | 10(C) | 42(N) | : 0.642460 |
| # 20: | 11(C) | 12(N) | : 1.242227 | # 20: | 11(C) | 12(N) | : 1.221260 |
| # 21: | 11(C) | 35(N) | : 0.812866 | # 21: | 11(C) | 29(N) | : 0.828549 |
| # 22: | 12(N) | 13(C) | : 1.268623 | # 22: | 12(N) | 13(C) | : 1.209451 |
| # 23: | 13(C) | 14(C) | : 1.388414 | # 23: | 13(C) | 14(C) | : 1.369597 |
| # 24: | 13(C) | 23(N) | : 0.791524 | # 24: | 13(C) | 23(N) | : 0.941599 |
| # 25: | 14(C) | 48(N) | : 0.703331 | # 25: | 14(C) | 48(N) | : 0.683521 |
| # 26: | 15(C) | 16(N) | : 1.310759 | # 26: | 15(C) | 16(N) | : 1.411249 |
| # 27: | 15(C) | 19(C) | : 1.209459 | # 27: | 15(C) | 19(N) | : 1.094151 |
| # 28: | 15(C) | 51(N) | : 0.796204 | # 28: | 15(C) | 51(N) | : 0.742807 |
| # 29: | 16(N) | 17(N) | : 0.831366 | # 29: | 16(N) | 17(N) | : 0.628657 |
| # 30: | 17(N) | 18(C) | : 0.835243 | # 30: | 17(N) | 18(C) | : 0.838404 |
| # 31: | 18(C) | 19(C) | : 1.363914 | # 31: | 18(C) | 19(N) | : 1.270690 |
| # 32: | 18(C) | 54(N) | : 0.882494 | # 32: | 18(C) | 20(N) | : 1.137594 |
| # 33: | 19(C) | 20(N) | : 1.167271 | # 33: | 20(N) | 65(H) | : 0.666179 |
| # 34: | 20(N) | 77(H) | : 0.675683 | # 34: | 20(N) | 66(H) | : 0.675927 |
| # 35: | 20(N) | 78(H) | : 0.674968 | # 35: | 21(C) | 22(N) | : 1.398060 |
| # 36: | 21(C) | 22(N) | : 1.309617 | # 36: | 21(C) | 25(N) | : 1.087278 |
| # 37: | 21(C) | 25(C) | : 1.218128 | # 37: | 21(C) | 54(N) | : 0.733258 |
| # 38: | 21(C) | 57(N) | : 0.800937 | # 38: | 22(N) | 23(N) | : 0.642578 |
| # 39: | 22(N) | 23(N) | : 0.861825 | # 39: | 23(N) | 24(C) | : 0.816923 |
| # 40: | 23(N) | 24(C) | : 0.833183 | # 40: | 24(C) | 25(N) | : 1.271414 |
| # 41: | 24(C) | 25(C) | : 1.356406 | # 41: | 24(C) | 26(N) | : 1.189270 |
| # 42: | 24(C) | 60(N) | : 0.920970 | # 42: | 26(N) | 67(H) | : 0.660830 |
| # 43: | 25(C) | 26(N) | : 1.168343 | # 43: | 26(N) | 68(H) | : 0.675660 |
| # 44: | 26(N) | 79(H) | : 0.673627 | # 44: | 27(C) | 28(N) | : 1.411246 |
| # 45: | 26(N) | 80(H) | : 0.675373 | # 45: | 27(C) | 31(N) | : 1.094139 |
| # 46: | 27(C) | 28(N) | : 1.258165 | # 46: | 27(C) | 57(N) | : 0.742803 |
| # 47: | 27(C) | 31(C) | : 1.220971 | # 47: | 28(N) | 29(N) | : 0.628642 |
| # 48: | 27(C) | 63(N) | : 0.810946 | # 48: | 29(N) | 30(C) | : 0.838413 |
| # 49: | 28(N) | 29(N) | : 0.876811 | # 49: | 30(C) | 31(N) | : 1.270690 |
| # 50: | 29(N) | 30(C) | : 0.867864 | # 50: | 30(C) | 32(N) | : 1.137608 |
| # 51: | 30(C) | 31(C) | : 1.353485 | # 51: | 32(N) | 69(H) | : 0.666165 |
| # 52: | 30(C) | 66(N) | : 0.921096 | # 52: | 32(N) | 70(H) | : 0.675931 |
| # 53: | 31(C) | 32(N) | : 1.149844 | # 53: | 33(C) | 34(N) | : 1.398064 |
| # 54: | 32(N) | 81(H) | : 0.677584 | # 54: | 33(C) | 37(N) | : 1.087288 |
| # 55: | 32(N) | 82(H) | : 0.672445 | # 55: | 33(C) | 60(N) | : 0.733257 |

---



|                            |       |       |            |                            |       |       |            |
|----------------------------|-------|-------|------------|----------------------------|-------|-------|------------|
| # 56:                      | 33(C) | 34(N) | : 1.306927 | # 56:                      | 34(N) | 35(N) | : 0.642572 |
| # 57:                      | 33(C) | 37(C) | : 1.212269 | # 57:                      | 35(N) | 36(C) | : 0.816921 |
| # 58:                      | 33(C) | 69(N) | : 0.798942 | # 58:                      | 36(C) | 37(N) | : 1.271407 |
| # 59:                      | 34(N) | 35(N) | : 0.839781 | # 59:                      | 36(C) | 38(N) | : 1.189272 |
| # 60:                      | 35(N) | 36(C) | : 0.841654 | # 60:                      | 38(N) | 71(H) | : 0.660832 |
| # 61:                      | 36(C) | 37(C) | : 1.359549 | # 61:                      | 38(N) | 72(H) | : 0.675665 |
| # 62:                      | 36(C) | 72(N) | : 0.889327 | # 62:                      | 39(N) | 40(O) | : 0.926666 |
| # 63:                      | 37(C) | 38(N) | : 1.165452 | # 63:                      | 39(N) | 41(O) | : 1.007964 |
| # 64:                      | 38(N) | 83(H) | : 0.672780 | # 64:                      | 42(N) | 43(O) | : 0.926703 |
| # 65:                      | 38(N) | 84(H) | : 0.675556 | # 65:                      | 42(N) | 44(O) | : 1.007937 |
| # 66:                      | 39(N) | 40(O) | : 0.978564 | # 66:                      | 45(N) | 46(O) | : 1.044369 |
| # 67:                      | 39(N) | 41(O) | : 0.989999 | # 67:                      | 45(N) | 47(O) | : 0.896609 |
| # 68:                      | 42(N) | 43(O) | : 0.974230 | # 68:                      | 48(N) | 49(O) | : 1.044359 |
| # 69:                      | 42(N) | 44(O) | : 0.987950 | # 69:                      | 48(N) | 50(O) | : 0.896602 |
| # 70:                      | 45(N) | 46(O) | : 1.001794 | # 70:                      | 51(N) | 52(O) | : 0.989928 |
| # 71:                      | 45(N) | 47(O) | : 0.889549 | # 71:                      | 51(N) | 53(O) | : 0.956971 |
| # 72:                      | 48(N) | 49(O) | : 0.983654 | # 72:                      | 54(N) | 55(O) | : 0.979338 |
| # 73:                      | 48(N) | 50(O) | : 0.897926 | # 73:                      | 54(N) | 56(O) | : 0.966628 |
| # 74:                      | 51(N) | 52(O) | : 1.011489 | # 74:                      | 57(N) | 58(O) | : 0.989898 |
| # 75:                      | 51(N) | 53(O) | : 0.880086 | # 75:                      | 57(N) | 59(O) | : 0.956997 |
| # 76:                      | 54(N) | 55(O) | : 0.938792 | # 76:                      | 60(N) | 61(O) | : 0.979348 |
| # 77:                      | 54(N) | 56(O) | : 0.863990 | # 77:                      | 60(N) | 62(O) | : 0.966622 |
| # 78:                      | 57(N) | 58(O) | : 1.006839 |                            |       |       |            |
| # 79:                      | 57(N) | 59(O) | : 0.876480 |                            |       |       |            |
| # 80:                      | 60(N) | 61(O) | : 0.891445 | # 47:                      | 28(N) | 29(N) | : 0.628642 |
| # 81:                      | 60(N) | 62(O) | : 0.873663 |                            |       |       |            |
| # 82:                      | 63(N) | 64(O) | : 0.998452 |                            |       |       |            |
| # 83:                      | 63(N) | 65(O) | : 0.872268 |                            |       |       |            |
| # 84:                      | 66(N) | 67(O) | : 0.907825 |                            |       |       |            |
| # 85:                      | 66(N) | 68(O) | : 0.875030 |                            |       |       |            |
| # 86:                      | 69(N) | 70(O) | : 1.007770 |                            |       |       |            |
| # 87:                      | 69(N) | 71(O) | : 0.885758 |                            |       |       |            |
| # 88:                      | 72(N) | 73(O) | : 0.930210 |                            |       |       |            |
| # 89:                      | 72(N) | 74(O) | : 0.869913 |                            |       |       |            |
| # 5:                       | 2(N)  | 76(H) | : 0.623698 |                            |       |       |            |
| E1                         |       |       |            | E2                         |       |       |            |
| The bond order >= 0.050000 |       |       |            | The bond order >= 0.050000 |       |       |            |
| # 1:                       | 1(C)  | 2(C)  | : 1.695560 | # 1:                       | 1(C)  | 2(C)  | : 1.715096 |
| # 2:                       | 1(C)  | 3(C)  | : 1.109632 | # 2:                       | 1(C)  | 3(C)  | : 1.115638 |
| # 3:                       | 1(C)  | 27(H) | : 0.834378 | # 3:                       | 1(C)  | 27(H) | : 0.833663 |
| # 4:                       | 2(C)  | 4(C)  | : 1.109632 | # 4:                       | 2(C)  | 4(C)  | : 1.115705 |
| # 5:                       | 2(C)  | 28(H) | : 0.834378 | # 5:                       | 2(C)  | 28(H) | : 0.833683 |
| # 6:                       | 3(C)  | 5(C)  | : 1.363796 | # 6:                       | 3(C)  | 5(C)  | : 1.364004 |

|                            |       |        |          |                            |       |        |          |
|----------------------------|-------|--------|----------|----------------------------|-------|--------|----------|
| # 7:                       | 3(C)  | 9(C):  | 1.364856 | # 7:                       | 3(C)  | 9(C):  | 1.338130 |
| # 8:                       | 4(C)  | 10(C): | 1.363796 | # 8:                       | 4(C)  | 10(C): | 1.364051 |
| # 9:                       | 4(C)  | 14(C): | 1.364856 | # 9:                       | 4(C)  | 14(C): | 1.338140 |
| # 10:                      | 5(C)  | 6(C):  | 1.397135 | # 10:                      | 5(C)  | 6(C):  | 1.450126 |
| # 11:                      | 5(C)  | 15(N): | 0.678121 | # 11:                      | 5(C)  | 15(N): | 0.683305 |
| # 12:                      | 6(C)  | 7(N):  | 1.185844 | # 12:                      | 6(C)  | 7(N):  | 1.250407 |
| # 13:                      | 6(C)  | 31(C): | 1.254216 | # 13:                      | 6(C)  | 29(H): | 0.852612 |
| # 14:                      | 7(N)  | 8(C):  | 1.234071 | # 14:                      | 7(N)  | 8(C):  | 1.210986 |
| # 15:                      | 8(C)  | 9(C):  | 1.460992 | # 15:                      | 8(C)  | 9(C):  | 1.325666 |
| # 16:                      | 8(C)  | 29(H): | 0.853280 | # 16:                      | 8(C)  | 30(N): | 0.884937 |
| # 17:                      | 9(C)  | 18(N): | 0.667120 | # 17:                      | 9(C)  | 18(N): | 0.673069 |
| # 18:                      | 10(C) | 11(C): | 1.397135 | # 18:                      | 10(C) | 11(C): | 1.450080 |
| # 19:                      | 10(C) | 24(N): | 0.678121 | # 19:                      | 10(C) | 24(N): | 0.683360 |
| # 20:                      | 11(C) | 12(N): | 1.185844 | # 20:                      | 11(C) | 12(N): | 1.250294 |
| # 21:                      | 11(C) | 33(C): | 1.254216 | # 21:                      | 11(C) | 36(H): | 0.852628 |
| # 22:                      | 12(N) | 13(C): | 1.234071 | # 22:                      | 12(N) | 13(C): | 1.211044 |
| # 23:                      | 13(C) | 14(C): | 1.460992 | # 23:                      | 13(C) | 14(C): | 1.325655 |
| # 24:                      | 13(C) | 30(H): | 0.853280 | # 24:                      | 13(C) | 34(N): | 0.884912 |
| # 25:                      | 14(C) | 21(N): | 0.667120 | # 25:                      | 14(C) | 21(N): | 0.673010 |
| # 26:                      | 15(N) | 16(O): | 0.963156 | # 26:                      | 15(N) | 16(O): | 0.942907 |
| # 27:                      | 15(N) | 17(O): | 1.000376 | # 27:                      | 15(N) | 17(O): | 0.978034 |
| # 28:                      | 18(N) | 19(O): | 0.973960 | # 28:                      | 18(N) | 19(O): | 0.944439 |
| # 29:                      | 18(N) | 20(O): | 0.957712 | # 29:                      | 18(N) | 20(O): | 0.961903 |
| # 30:                      | 21(N) | 22(O): | 0.973960 | # 30:                      | 21(N) | 22(O): | 0.944486 |
| # 31:                      | 21(N) | 23(O): | 0.957712 | # 31:                      | 21(N) | 23(O): | 0.961884 |
| # 32:                      | 24(N) | 25(O): | 0.963156 | # 32:                      | 24(N) | 25(O): | 0.978135 |
| # 33:                      | 24(N) | 26(O): | 1.000376 | # 33:                      | 24(N) | 26(O): | 0.942791 |
| # 34:                      | 31(C) | 32(N): | 2.535011 | # 34:                      | 30(N) | 31(N): | 1.149040 |
| # 35:                      | 33(C) | 34(N): | 2.535011 | # 35:                      | 31(N) | 32(N): | 2.201061 |
|                            |       |        |          | # 36:                      | 33(N) | 35(N): | 2.201122 |
|                            |       |        |          | # 37:                      | 34(N) | 35(N): | 1.148954 |
| # 17:                      | 9(C)  | 18(N): | 0.667120 | # 25:                      | 14(C) | 21(N): | 0.673010 |
| E3                         |       |        |          | E4                         |       |        |          |
| The bond order >= 0.050000 |       |        |          | The bond order >= 0.050000 |       |        |          |
| # 1:                       | 1(C)  | 2(C):  | 1.715117 | # 1:                       | 1(C)  | 2(C):  | 1.741112 |
| # 2:                       | 1(C)  | 3(C):  | 1.126386 | # 2:                       | 1(C)  | 3(C):  | 1.082658 |
| # 3:                       | 1(C)  | 27(H): | 0.833543 | # 3:                       | 1(C)  | 35(H): | 0.828670 |
| # 4:                       | 2(C)  | 4(C):  | 1.126386 | # 4:                       | 2(C)  | 4(C):  | 1.082714 |
| # 5:                       | 2(C)  | 28(H): | 0.833543 | # 5:                       | 2(C)  | 36(H): | 0.828634 |
| # 6:                       | 3(C)  | 5(C):  | 1.368145 | # 6:                       | 3(C)  | 5(C):  | 1.322392 |
| # 7:                       | 3(C)  | 9(C):  | 1.354326 | # 7:                       | 3(C)  | 9(C):  | 1.354021 |
| # 8:                       | 4(C)  | 10(C): | 1.368145 | # 8:                       | 4(C)  | 10(C): | 1.322014 |
| # 9:                       | 4(C)  | 14(C): | 1.354326 | # 9:                       | 4(C)  | 14(C): | 1.354100 |

|                            |       |        |          |                            |       |        |          |
|----------------------------|-------|--------|----------|----------------------------|-------|--------|----------|
| # 10:                      | 5(C)  | 6(C):  | 1.453123 | # 10:                      | 5(C)  | 6(C):  | 1.280449 |
| # 11:                      | 5(C)  | 15(N): | 0.682880 | # 11:                      | 5(C)  | 15(N): | 0.702892 |
| # 12:                      | 6(C)  | 7(N):  | 1.212301 | # 12:                      | 6(C)  | 7(N):  | 1.127788 |
| # 13:                      | 6(C)  | 29(H): | 0.852652 | # 13:                      | 6(C)  | 29(N): | 1.176347 |
| # 14:                      | 7(N)  | 8(C):  | 1.268539 | # 14:                      | 7(N)  | 8(C):  | 1.286916 |
| # 15:                      | 8(C)  | 9(C):  | 1.439141 | # 15:                      | 8(C)  | 9(C):  | 1.422511 |
| # 16:                      | 8(C)  | 32(N): | 0.855712 | # 16:                      | 8(C)  | 27(H): | 0.851316 |
| # 17:                      | 9(C)  | 18(N): | 0.680203 | # 17:                      | 9(C)  | 18(N): | 0.698444 |
| # 18:                      | 10(C) | 11(C): | 1.453123 | # 18:                      | 10(C) | 11(C): | 1.280507 |
| # 19:                      | 10(C) | 24(N): | 0.682880 | # 19:                      | 10(C) | 24(N): | 0.702995 |
| # 20:                      | 11(C) | 12(N): | 1.212301 | # 20:                      | 11(C) | 12(N): | 1.127652 |
| # 21:                      | 11(C) | 30(H): | 0.852652 | # 21:                      | 11(C) | 32(N): | 1.176458 |
| # 22:                      | 12(N) | 13(C): | 1.268539 | # 22:                      | 12(N) | 13(C): | 1.287071 |
| # 23:                      | 13(C) | 14(C): | 1.439141 | # 23:                      | 13(C) | 14(C): | 1.422447 |
| # 24:                      | 13(C) | 31(N): | 0.855712 | # 24:                      | 13(C) | 28(H): | 0.851345 |
| # 25:                      | 14(C) | 21(N): | 0.680203 | # 25:                      | 14(C) | 21(N): | 0.698396 |
| # 26:                      | 15(N) | 16(O): | 0.958009 | # 26:                      | 15(N) | 16(O): | 0.887762 |
| # 27:                      | 15(N) | 17(O): | 0.984857 | # 27:                      | 15(N) | 17(O): | 0.956514 |
| # 28:                      | 18(N) | 19(O): | 0.991479 | # 28:                      | 18(N) | 19(O): | 0.949949 |
| # 29:                      | 18(N) | 20(O): | 0.966518 | # 29:                      | 18(N) | 20(O): | 0.948516 |
| # 30:                      | 21(N) | 22(O): | 0.991479 | # 30:                      | 21(N) | 22(O): | 0.950103 |
| # 31:                      | 21(N) | 23(O): | 0.966518 | # 31:                      | 21(N) | 23(O): | 0.948682 |
| # 32:                      | 24(N) | 25(O): | 0.958009 | # 32:                      | 24(N) | 25(O): | 0.887621 |
| # 33:                      | 24(N) | 26(O): | 0.984857 | # 33:                      | 24(N) | 26(O): | 0.956713 |
| # 34:                      | 31(N) | 33(F): | 0.142371 | # 34:                      | 29(N) | 30(H): | 0.681924 |
| # 35:                      | 31(N) | 36(F): | 0.153541 | # 35:                      | 29(N) | 31(H): | 0.671230 |
| # 36:                      | 32(N) | 34(F): | 0.142371 | # 36:                      | 32(N) | 33(H): | 0.681936 |
| # 37:                      | 32(N) | 35(F): | 0.153541 | # 37:                      | 32(N) | 34(H): | 0.671190 |
| # 34:                      | 31(N) | 33(F): | 0.142371 | # 37:                      | 32(N) | 34(H): | 0.671190 |
| E5                         |       |        |          | E6                         |       |        |          |
| The bond order >= 0.050000 |       |        |          | The bond order >= 0.050000 |       |        |          |
| # 1:                       | 1(C)  | 2(C):  | 1.728707 | # 1:                       | 1(C)  | 2(C):  | 1.727605 |
| # 2:                       | 1(C)  | 3(C):  | 1.070016 | # 2:                       | 1(C)  | 3(C):  | 1.067567 |
| # 3:                       | 1(C)  | 35(H): | 0.827669 | # 3:                       | 1(C)  | 27(H): | 0.827392 |
| # 4:                       | 2(C)  | 4(C):  | 1.070024 | # 4:                       | 2(C)  | 4(C):  | 1.067579 |
| # 5:                       | 2(C)  | 36(H): | 0.827667 | # 5:                       | 2(C)  | 28(H): | 0.827392 |
| # 6:                       | 3(C)  | 5(C):  | 1.369229 | # 6:                       | 3(C)  | 5(C):  | 1.377482 |
| # 7:                       | 3(C)  | 9(C):  | 1.385060 | # 7:                       | 3(C)  | 9(C):  | 1.370302 |
| # 8:                       | 4(C)  | 10(C): | 1.369221 | # 8:                       | 4(C)  | 10(C): | 1.377522 |
| # 9:                       | 4(C)  | 14(C): | 1.385071 | # 9:                       | 4(C)  | 14(C): | 1.370267 |
| # 10:                      | 5(C)  | 6(C):  | 1.308623 | # 10:                      | 5(C)  | 6(C):  | 1.248555 |
| # 11:                      | 5(C)  | 23(N): | 0.674273 | # 11:                      | 5(C)  | 15(N): | 0.683836 |
| # 12:                      | 6(C)  | 7(N):  | 1.215356 | # 12:                      | 6(C)  | 7(N):  | 1.152405 |

|                            |       |        |          |                            |       |        |          |
|----------------------------|-------|--------|----------|----------------------------|-------|--------|----------|
| # 13:                      | 6(C)  | 15(N): | 0.963414 | # 13:                      | 6(C)  | 31(N): | 1.122837 |
| # 14:                      | 7(N)  | 8(C):  | 1.237307 | # 14:                      | 7(N)  | 8(C):  | 1.270734 |
| # 15:                      | 8(C)  | 9(C):  | 1.454611 | # 15:                      | 8(C)  | 9(C):  | 1.428359 |
| # 16:                      | 8(C)  | 37(H): | 0.853482 | # 16:                      | 8(C)  | 29(H): | 0.851703 |
| # 17:                      | 9(C)  | 26(N): | 0.688512 | # 17:                      | 9(C)  | 18(N): | 0.712453 |
| # 18:                      | 10(C) | 11(C): | 1.308649 | # 18:                      | 10(C) | 11(C): | 1.248604 |
| # 19:                      | 10(C) | 32(N): | 0.674265 | # 19:                      | 10(C) | 24(N): | 0.683841 |
| # 20:                      | 11(C) | 12(N): | 1.215351 | # 20:                      | 11(C) | 12(N): | 1.152417 |
| # 21:                      | 11(C) | 19(N): | 0.963395 | # 21:                      | 11(C) | 33(N): | 1.122826 |
| # 22:                      | 12(N) | 13(C): | 1.237320 | # 22:                      | 12(N) | 13(C): | 1.270718 |
| # 23:                      | 13(C) | 14(C): | 1.454604 | # 23:                      | 13(C) | 14(C): | 1.428365 |
| # 24:                      | 13(C) | 38(H): | 0.853479 | # 24:                      | 13(C) | 30(H): | 0.851705 |
| # 25:                      | 14(C) | 29(N): | 0.688505 | # 25:                      | 14(C) | 21(N): | 0.712451 |
| # 26:                      | 15(N) | 16(N): | 0.568525 | # 26:                      | 15(N) | 16(O): | 0.977330 |
| # 27:                      | 15(N) | 39(H): | 0.649152 | # 27:                      | 15(N) | 17(O): | 0.891096 |
| # 28:                      | 16(N) | 17(O): | 0.983690 | # 28:                      | 18(N) | 19(O): | 0.944883 |
| # 29:                      | 16(N) | 18(O): | 1.033952 | # 29:                      | 18(N) | 20(O): | 0.934433 |
| # 30:                      | 19(N) | 20(N): | 0.568453 | # 30:                      | 21(N) | 22(O): | 0.944879 |
| # 31:                      | 19(N) | 40(H): | 0.649161 | # 31:                      | 21(N) | 23(O): | 0.934441 |
| # 32:                      | 20(N) | 21(O): | 0.983698 | # 32:                      | 24(N) | 25(O): | 0.891076 |
| # 33:                      | 20(N) | 22(O): | 1.033942 | # 33:                      | 24(N) | 26(O): | 0.977333 |
| # 34:                      | 23(N) | 24(O): | 0.990506 | # 34:                      | 31(N) | 32(H): | 0.660006 |
| # 35:                      | 23(N) | 25(O): | 0.919833 | # 35:                      | 31(N) | 35(N): | 0.626331 |
| # 36:                      | 26(N) | 27(O): | 0.970807 | # 36:                      | 33(N) | 34(H): | 0.660006 |
| # 37:                      | 26(N) | 28(O): | 0.943352 | # 37:                      | 33(N) | 38(N): | 0.626341 |
| # 38:                      | 29(N) | 30(O): | 0.970807 | # 38:                      | 35(N) | 36(H): | 0.695875 |
| # 39:                      | 29(N) | 31(O): | 0.943358 | # 39:                      | 35(N) | 37(H): | 0.694307 |
| # 40:                      | 32(N) | 33(O): | 0.919833 | # 40:                      | 38(N) | 39(H): | 0.694305 |
| # 41:                      | 32(N) | 34(O): | 0.990511 | # 41:                      | 38(N) | 40(H): | 0.695876 |
| # 30:                      | 19(N) | 20(N): | 0.568453 | # 35:                      | 31(N) | 35(N): | 0.626331 |
| E7                         |       |        |          | E8                         |       |        |          |
| The bond order >= 0.050000 |       |        |          | The bond order >= 0.050000 |       |        |          |
| # 1:                       | 1(C)  | 3(C):  | 1.369684 | # 1:                       | 1(C)  | 2(C):  | 1.731188 |
| # 2:                       | 1(C)  | 7(C):  | 1.397455 | # 2:                       | 1(C)  | 3(C):  | 1.064195 |
| # 3:                       | 1(C)  | 46(C): | 1.071459 | # 3:                       | 1(C)  | 47(H): | 0.820143 |
| # 4:                       | 2(C)  | 8(C):  | 1.377434 | # 4:                       | 2(C)  | 4(C):  | 1.064195 |
| # 5:                       | 2(C)  | 12(C): | 1.388959 | # 5:                       | 2(C)  | 48(H): | 0.820143 |
| # 6:                       | 2(C)  | 45(C): | 1.070562 | # 6:                       | 3(C)  | 5(C):  | 1.381994 |
| # 7:                       | 3(C)  | 4(C):  | 1.394759 | # 7:                       | 3(C)  | 9(C):  | 1.387987 |
| # 8:                       | 3(C)  | 27(N): | 0.676198 | # 8:                       | 4(C)  | 10(C): | 1.381986 |
| # 9:                       | 4(C)  | 5(N):  | 1.207722 | # 9:                       | 4(C)  | 14(C): | 1.387987 |
| # 10:                      | 4(C)  | 13(C): | 1.044805 | # 10:                      | 5(C)  | 6(C):  | 1.368985 |
| # 11:                      | 5(N)  | 6(C):  | 1.227721 | # 11:                      | 5(C)  | 35(N): | 0.677740 |

|                            |       |        |          |                            |       |        |          |
|----------------------------|-------|--------|----------|----------------------------|-------|--------|----------|
| # 12:                      | 6(C)  | 7(C):  | 1.462894 | # 12:                      | 6(C)  | 7(N):  | 1.214378 |
| # 13:                      | 6(C)  | 41(H): | 0.854353 | # 13:                      | 6(C)  | 15(C): | 1.011501 |
| # 14:                      | 7(C)  | 30(N): | 0.679054 | # 14:                      | 7(N)  | 8(C):  | 1.215554 |
| # 15:                      | 8(C)  | 9(C):  | 1.380982 | # 15:                      | 8(C)  | 9(C):  | 1.486401 |
| # 16:                      | 8(C)  | 36(N): | 0.670538 | # 16:                      | 8(C)  | 49(H): | 0.852932 |
| # 17:                      | 9(C)  | 10(N): | 1.210323 | # 17:                      | 9(C)  | 38(N): | 0.679944 |
| # 18:                      | 9(C)  | 20(C): | 1.027136 | # 18:                      | 10(C) | 11(C): | 1.369006 |
| # 19:                      | 10(N) | 11(C): | 1.217434 | # 19:                      | 10(C) | 44(N): | 0.677753 |
| # 20:                      | 11(C) | 12(C): | 1.475782 | # 20:                      | 11(C) | 12(N): | 1.214373 |
| # 21:                      | 11(C) | 42(H): | 0.853921 | # 21:                      | 11(C) | 25(C): | 1.011512 |
| # 22:                      | 12(C) | 33(N): | 0.680709 | # 22:                      | 12(N) | 13(C): | 1.215550 |
| # 23:                      | 13(C) | 14(N): | 0.536952 | # 23:                      | 13(C) | 14(C): | 1.486394 |
| # 24:                      | 13(C) | 17(N): | 0.546964 | # 24:                      | 13(C) | 50(H): | 0.852928 |
| # 25:                      | 13(C) | 43(H): | 0.835002 | # 25:                      | 14(C) | 41(N): | 0.679954 |
| # 26:                      | 14(N) | 15(O): | 0.998601 | # 26:                      | 15(C) | 16(N): | 0.462907 |
| # 27:                      | 14(N) | 16(O): | 1.015829 | # 27:                      | 15(C) | 19(N): | 0.519349 |
| # 28:                      | 17(N) | 18(O): | 0.988834 | # 28:                      | 15(C) | 22(N): | 0.465836 |
| # 29:                      | 17(N) | 19(O): | 1.029643 | # 29:                      | 16(N) | 17(O): | 0.997897 |
| # 30:                      | 20(C) | 21(N): | 0.524263 | # 30:                      | 16(N) | 18(O): | 1.072185 |
| # 31:                      | 20(C) | 24(N): | 0.559620 | # 31:                      | 19(N) | 20(O): | 0.981333 |
| # 32:                      | 20(C) | 44(H): | 0.830721 | # 32:                      | 19(N) | 21(O): | 1.044017 |
| # 33:                      | 21(N) | 22(O): | 0.982102 | # 33:                      | 22(N) | 23(O): | 1.023122 |
| # 34:                      | 21(N) | 23(O): | 1.028144 | # 34:                      | 22(N) | 24(O): | 1.042178 |
| # 35:                      | 24(N) | 25(O): | 1.005021 | # 35:                      | 25(C) | 26(N): | 0.519347 |
| # 36:                      | 24(N) | 26(O): | 1.019140 | # 36:                      | 25(C) | 29(N): | 0.462892 |
| # 37:                      | 27(N) | 28(O): | 0.948244 | # 37:                      | 25(C) | 32(N): | 0.465842 |
| # 38:                      | 27(N) | 29(O): | 0.981250 | # 38:                      | 26(N) | 27(O): | 0.981335 |
| # 39:                      | 30(N) | 31(O): | 0.983284 | # 39:                      | 26(N) | 28(O): | 1.044017 |
| # 40:                      | 30(N) | 32(O): | 0.950906 | # 40:                      | 29(N) | 30(O): | 0.997844 |
| # 41:                      | 33(N) | 34(O): | 0.978063 | # 41:                      | 29(N) | 31(O): | 1.072179 |
| # 42:                      | 33(N) | 35(O): | 0.954064 | # 42:                      | 32(N) | 33(O): | 1.042175 |
| # 43:                      | 36(N) | 37(O): | 1.000276 | # 43:                      | 32(N) | 34(O): | 1.023127 |
| # 44:                      | 36(N) | 38(O): | 0.946173 | # 44:                      | 35(N) | 36(O): | 1.007210 |
| # 45:                      | 39(H) | 46(C): | 0.824420 | # 45:                      | 35(N) | 37(O): | 0.952765 |
| # 46:                      | 40(H) | 45(C): | 0.824070 | # 46:                      | 38(N) | 39(O): | 0.983791 |
| # 47:                      | 45(C) | 46(C): | 1.733080 | # 47:                      | 38(N) | 40(O): | 0.958237 |
|                            |       |        |          | # 48:                      | 41(N) | 42(O): | 0.983797 |
|                            |       |        |          | # 49:                      | 41(N) | 43(O): | 0.958241 |
| # 30:                      | 20(C) | 21(N): | 0.524263 | # 50:                      | 44(N) | 45(O): | 0.952764 |
|                            |       |        |          | # 51:                      | 44(N) | 46(O): | 1.007207 |
|                            |       |        |          | # 36:                      | 25(C) | 29(N): | 0.462892 |
| E9                         |       |        |          | E10                        |       |        |          |
| The bond order >= 0.050000 |       |        |          | The bond order >= 0.050000 |       |        |          |

---

|   |     |       |        |          |   |     |       |        |          |
|---|-----|-------|--------|----------|---|-----|-------|--------|----------|
| # | 1:  | 1(C)  | 2(C):  | 1.707677 | # | 1:  | 1(C)  | 2(C):  | 1.707568 |
| # | 2:  | 1(C)  | 3(C):  | 1.109864 | # | 2:  | 1(C)  | 3(C):  | 1.087919 |
| # | 3:  | 1(C)  | 27(H): | 0.838118 | # | 3:  | 1(C)  | 27(H): | 0.834493 |
| # | 4:  | 2(C)  | 4(C):  | 1.093002 | # | 4:  | 2(C)  | 4(C):  | 1.087924 |
| # | 5:  | 2(C)  | 28(H): | 0.825727 | # | 5:  | 2(C)  | 28(H): | 0.834490 |
| # | 6:  | 3(C)  | 5(C):  | 1.357527 | # | 6:  | 3(C)  | 5(C):  | 1.367321 |
| # | 7:  | 3(C)  | 9(C):  | 1.368714 | # | 7:  | 3(C)  | 9(C):  | 1.345989 |
| # | 8:  | 4(C)  | 10(C): | 1.346280 | # | 8:  | 4(C)  | 10(C): | 1.367341 |
| # | 9:  | 4(C)  | 14(C): | 1.356168 | # | 9:  | 4(C)  | 14(C): | 1.345977 |
| # | 10: | 5(C)  | 6(C):  | 1.443252 | # | 10: | 5(C)  | 6(C):  | 1.353055 |
| # | 11: | 5(C)  | 15(N): | 0.673058 | # | 11: | 5(C)  | 15(N): | 0.657111 |
| # | 12: | 6(C)  | 7(N):  | 1.299267 | # | 12: | 6(C)  | 7(N):  | 1.195592 |
| # | 13: | 6(C)  | 31(N): | 0.751833 | # | 13: | 6(C)  | 31(N): | 0.897268 |
| # | 14: | 7(N)  | 8(C):  | 1.204002 | # | 14: | 7(N)  | 8(C):  | 1.196443 |
| # | 15: | 8(C)  | 9(C):  | 1.474507 | # | 15: | 8(C)  | 9(C):  | 1.490673 |
| # | 16: | 8(C)  | 29(H): | 0.856315 | # | 16: | 8(C)  | 29(H): | 0.857848 |
| # | 17: | 9(C)  | 18(N): | 0.665121 | # | 17: | 9(C)  | 18(N): | 0.682235 |
| # | 18: | 10(C) | 11(C): | 1.432825 | # | 18: | 10(C) | 11(C): | 1.353063 |
| # | 19: | 10(C) | 24(N): | 0.679557 | # | 19: | 10(C) | 24(N): | 0.657122 |
| # | 20: | 11(C) | 12(N): | 1.293876 | # | 20: | 11(C) | 12(N): | 1.195592 |
| # | 21: | 11(C) | 45(N): | 0.760068 | # | 21: | 11(C) | 43(N): | 0.897256 |
| # | 22: | 12(N) | 13(C): | 1.206473 | # | 22: | 12(N) | 13(C): | 1.196444 |
| # | 23: | 13(C) | 14(C): | 1.474493 | # | 23: | 13(C) | 14(C): | 1.490676 |
| # | 24: | 13(C) | 30(H): | 0.856579 | # | 24: | 13(C) | 30(H): | 0.857855 |
| # | 25: | 14(C) | 21(N): | 0.673956 | # | 25: | 14(C) | 21(N): | 0.682247 |
| # | 26: | 15(N) | 16(O): | 0.952197 | # | 26: | 15(N) | 16(O): | 0.981342 |
| # | 27: | 15(N) | 17(O): | 0.998061 | # | 27: | 15(N) | 17(O): | 1.017076 |
| # | 28: | 18(N) | 19(O): | 0.978184 | # | 28: | 18(N) | 19(O): | 0.963833 |
| # | 29: | 18(N) | 20(O): | 0.960624 | # | 29: | 18(N) | 20(O): | 0.956578 |
| # | 30: | 21(N) | 22(O): | 0.978983 | # | 30: | 21(N) | 22(O): | 0.963800 |
| # | 31: | 21(N) | 23(O): | 0.967247 | # | 31: | 21(N) | 23(O): | 0.956593 |
| # | 32: | 24(N) | 25(O): | 0.983339 | # | 32: | 24(N) | 25(O): | 0.981345 |
| # | 33: | 24(N) | 26(O): | 0.985957 | # | 33: | 24(N) | 26(O): | 1.017075 |
| # | 34: | 31(N) | 32(C): | 0.935581 | # | 34: | 31(N) | 32(C): | 0.868660 |
| # | 35: | 31(N) | 33(N): | 0.809965 | # | 35: | 31(N) | 33(N): | 0.618197 |
| # | 36: | 32(C) | 34(C): | 1.435067 | # | 36: | 32(C) | 34(C): | 1.353572 |
| # | 37: | 32(C) | 35(N): | 0.814035 | # | 37: | 32(C) | 35(N): | 1.217350 |
| # | 38: | 33(N) | 36(C): | 1.300674 | # | 38: | 33(N) | 36(C): | 1.422637 |
| # | 39: | 34(C) | 36(C): | 1.278307 | # | 39: | 34(C) | 36(C): | 1.228149 |
| # | 40: | 34(C) | 37(N): | 0.727136 | # | 40: | 34(C) | 37(N): | 0.867142 |
| # | 41: | 35(N) | 38(O): | 0.940898 | # | 41: | 35(N) | 55(H): | 0.660850 |
| # | 42: | 35(N) | 39(O): | 0.984979 | # | 42: | 35(N) | 58(H): | 0.660983 |
| # | 43: | 36(C) | 40(N): | 0.764832 | # | 43: | 36(C) | 38(N): | 0.746581 |
| # | 44: | 37(N) | 41(O): | 1.007826 | # | 44: | 37(N) | 39(O): | 0.855204 |
| # | 45: | 37(N) | 42(O): | 1.010094 | # | 45: | 37(N) | 40(O): | 0.961820 |

---

|                            |       |        |          |                            |       |        |          |
|----------------------------|-------|--------|----------|----------------------------|-------|--------|----------|
| # 46:                      | 40(N) | 43(O): | 0.999556 | # 46:                      | 38(N) | 41(O): | 0.997445 |
| # 47:                      | 40(N) | 44(O): | 0.952830 | # 47:                      | 38(N) | 42(O): | 0.991038 |
| # 48:                      | 45(N) | 46(C): | 0.932197 | # 48:                      | 43(N) | 44(C): | 0.868634 |
| # 49:                      | 45(N) | 47(N): | 0.802998 | # 49:                      | 43(N) | 45(N): | 0.618196 |
| # 50:                      | 46(C) | 48(C): | 1.439548 | # 50:                      | 44(C) | 46(C): | 1.353570 |
| # 51:                      | 46(C) | 49(N): | 0.801414 | # 51:                      | 44(C) | 47(N): | 1.217350 |
| # 52:                      | 47(N) | 50(C): | 1.304153 | # 52:                      | 45(N) | 48(C): | 1.422632 |
| # 53:                      | 48(C) | 50(C): | 1.273506 | # 53:                      | 46(C) | 48(C): | 1.228148 |
| # 54:                      | 48(C) | 51(N): | 0.731874 | # 54:                      | 46(C) | 49(N): | 0.867134 |
| # 55:                      | 49(N) | 52(O): | 0.949222 | # 55:                      | 47(N) | 56(H): | 0.660856 |
| # 56:                      | 49(N) | 53(O): | 0.982610 | # 56:                      | 47(N) | 57(H): | 0.660982 |
| # 57:                      | 50(C) | 54(N): | 0.761920 | # 57:                      | 48(C) | 50(N): | 0.746579 |
| # 58:                      | 51(N) | 55(O): | 1.000972 | # 58:                      | 49(N) | 51(O): | 0.855215 |
| # 59:                      | 51(N) | 56(O): | 1.003599 | # 59:                      | 49(N) | 52(O): | 0.961813 |
| # 60:                      | 54(N) | 57(O): | 1.004503 | # 60:                      | 50(N) | 53(O): | 0.997449 |
| # 61:                      | 54(N) | 58(O): | 0.950970 | # 61:                      | 50(N) | 54(O): | 0.991048 |
| # 17:                      | 9(C)  | 18(N): | 0.665121 | # 49:                      | 43(N) | 45(N): | 0.618196 |
| E11                        |       |        |          | E12                        |       |        |          |
| The bond order >= 0.050000 |       |        |          | The bond order >= 0.050000 |       |        |          |
| # 1:                       | 1(C)  | 2(C):  | 1.708936 | # 1:                       | 1(C)  | 2(C):  | 1.722912 |
| # 2:                       | 1(C)  | 3(C):  | 1.105868 | # 2:                       | 1(C)  | 3(C):  | 1.071509 |
| # 3:                       | 1(C)  | 27(H): | 0.835804 | # 3:                       | 1(C)  | 27(H): | 0.822823 |
| # 4:                       | 2(C)  | 4(C):  | 1.091825 | # 4:                       | 2(C)  | 4(C):  | 1.071248 |
| # 5:                       | 2(C)  | 28(H): | 0.828191 | # 5:                       | 2(C)  | 28(H): | 0.822713 |
| # 6:                       | 3(C)  | 5(C):  | 1.353860 | # 6:                       | 3(C)  | 5(C):  | 1.383452 |
| # 7:                       | 3(C)  | 9(C):  | 1.362090 | # 7:                       | 3(C)  | 9(C):  | 1.347068 |
| # 8:                       | 4(C)  | 10(C): | 1.351166 | # 8:                       | 4(C)  | 10(C): | 1.383356 |
| # 9:                       | 4(C)  | 14(C): | 1.348922 | # 9:                       | 4(C)  | 14(C): | 1.347306 |
| # 10:                      | 5(C)  | 6(C):  | 1.429433 | # 10:                      | 5(C)  | 6(C):  | 1.359488 |
| # 11:                      | 5(C)  | 15(N): | 0.669727 | # 11:                      | 5(C)  | 15(N): | 0.668206 |
| # 12:                      | 6(C)  | 7(N):  | 1.273570 | # 12:                      | 6(C)  | 7(N):  | 1.200971 |
| # 13:                      | 6(C)  | 31(N): | 0.806562 | # 13:                      | 6(C)  | 31(N): | 0.908449 |
| # 14:                      | 7(N)  | 8(C):  | 1.214206 | # 14:                      | 7(N)  | 8(C):  | 1.196514 |
| # 15:                      | 8(C)  | 9(C):  | 1.467393 | # 15:                      | 8(C)  | 9(C):  | 1.487595 |
| # 16:                      | 8(C)  | 29(H): | 0.853893 | # 16:                      | 8(C)  | 29(H): | 0.853630 |
| # 17:                      | 9(C)  | 18(N): | 0.671805 | # 17:                      | 9(C)  | 18(N): | 0.694130 |
| # 18:                      | 10(C) | 11(C): | 1.424554 | # 18:                      | 10(C) | 11(C): | 1.359505 |
| # 19:                      | 10(C) | 24(N): | 0.672557 | # 19:                      | 10(C) | 24(N): | 0.668479 |
| # 20:                      | 11(C) | 12(N): | 1.282125 | # 20:                      | 11(C) | 12(N): | 1.200735 |
| # 21:                      | 11(C) | 42(N): | 0.797620 | # 21:                      | 11(C) | 39(N): | 0.908795 |
| # 22:                      | 12(N) | 13(C): | 1.212846 | # 22:                      | 12(N) | 13(C): | 1.196353 |
| # 23:                      | 13(C) | 14(C): | 1.469986 | # 23:                      | 13(C) | 14(C): | 1.487488 |
| # 24:                      | 13(C) | 30(H): | 0.854534 | # 24:                      | 13(C) | 30(H): | 0.853456 |

|                            |       |        |          |                            |       |        |          |
|----------------------------|-------|--------|----------|----------------------------|-------|--------|----------|
| # 25:                      | 14(C) | 21(N): | 0.676166 | # 25:                      | 14(C) | 21(N): | 0.694539 |
| # 26:                      | 15(N) | 16(O): | 0.958555 | # 26:                      | 15(N) | 16(O): | 0.991194 |
| # 27:                      | 15(N) | 17(O): | 1.002012 | # 27:                      | 15(N) | 17(O): | 0.991519 |
| # 28:                      | 18(N) | 19(O): | 0.967630 | # 28:                      | 18(N) | 19(O): | 0.967755 |
| # 29:                      | 18(N) | 20(O): | 0.954743 | # 29:                      | 18(N) | 20(O): | 0.966217 |
| # 30:                      | 21(N) | 22(O): | 0.972511 | # 30:                      | 21(N) | 22(O): | 0.967757 |
| # 31:                      | 21(N) | 23(O): | 0.964083 | # 31:                      | 21(N) | 23(O): | 0.966513 |
| # 32:                      | 24(N) | 25(O): | 0.978954 | # 32:                      | 24(N) | 25(O): | 0.991346 |
| # 33:                      | 24(N) | 26(O): | 0.983929 | # 33:                      | 24(N) | 26(O): | 0.991319 |
| # 34:                      | 31(N) | 32(C): | 0.856664 | # 34:                      | 31(N) | 32(C): | 0.835219 |
| # 35:                      | 31(N) | 33(N): | 0.844965 | # 35:                      | 31(N) | 33(N): | 0.649374 |
| # 36:                      | 32(C) | 34(C): | 1.354763 | # 36:                      | 32(C) | 34(N): | 1.173099 |
| # 37:                      | 32(C) | 35(N): | 0.893721 | # 37:                      | 32(C) | 49(N): | 1.280396 |
| # 38:                      | 33(N) | 36(C): | 1.285619 | # 38:                      | 33(N) | 35(C): | 1.402874 |
| # 39:                      | 34(C) | 36(C): | 1.217352 | # 39:                      | 34(N) | 47(H): | 0.668011 |
| # 40:                      | 34(C) | 53(N): | 1.161056 | # 40:                      | 34(N) | 48(H): | 0.680273 |
| # 41:                      | 35(N) | 37(O): | 0.926274 | # 41:                      | 35(C) | 36(N): | 0.739726 |
| # 42:                      | 35(N) | 38(O): | 0.866944 | # 42:                      | 35(C) | 49(N): | 1.083440 |
| # 43:                      | 36(C) | 39(N): | 0.804217 | # 43:                      | 36(N) | 37(O): | 0.970943 |
| # 44:                      | 39(N) | 40(O): | 1.005497 | # 44:                      | 36(N) | 38(O): | 0.975877 |
| # 45:                      | 39(N) | 41(O): | 0.879127 | # 45:                      | 39(N) | 40(C): | 0.835443 |
| # 46:                      | 42(N) | 43(C): | 0.855770 | # 46:                      | 39(N) | 41(N): | 0.649497 |
| # 47:                      | 42(N) | 44(N): | 0.850203 | # 47:                      | 40(C) | 42(N): | 1.173389 |
| # 48:                      | 43(C) | 45(C): | 1.356629 | # 48:                      | 40(C) | 52(N): | 1.280464 |
| # 49:                      | 43(C) | 46(N): | 0.896568 | # 49:                      | 41(N) | 43(C): | 1.402992 |
| # 50:                      | 44(N) | 47(C): | 1.280742 | # 50:                      | 42(N) | 50(H): | 0.680253 |
| # 51:                      | 45(C) | 47(C): | 1.219273 | # 51:                      | 42(N) | 51(H): | 0.667971 |
| # 52:                      | 45(C) | 56(N): | 1.156858 | # 52:                      | 43(C) | 44(N): | 0.739988 |
| # 53:                      | 46(N) | 48(O): | 0.926390 | # 53:                      | 43(C) | 52(N): | 1.083192 |
| # 54:                      | 46(N) | 49(O): | 0.872303 | # 54:                      | 44(N) | 45(O): | 0.971205 |
| # 55:                      | 47(C) | 50(N): | 0.806359 | # 55:                      | 44(N) | 46(O): | 0.976584 |
| # 56:                      | 50(N) | 51(O): | 1.002134 |                            |       |        |          |
| # 57:                      | 50(N) | 52(O): | 0.875566 |                            |       |        |          |
| # 58:                      | 53(N) | 54(H): | 0.674943 | # 35:                      | 31(N) | 33(N): | 0.649374 |
| # 59:                      | 53(N) | 55(H): | 0.674741 |                            |       |        |          |
| # 60:                      | 56(N) | 57(H): | 0.675129 |                            |       |        |          |
| # 61:                      | 56(N) | 58(H): | 0.674889 |                            |       |        |          |
| # 11:                      | 5(C)  | 15(N): | 0.669727 |                            |       |        |          |
| F1                         |       |        |          | F2                         |       |        |          |
| The bond order >= 0.050000 |       |        |          | The bond order >= 0.050000 |       |        |          |
| # 1:                       | 1(C)  | 2(C):  | 1.700569 | # 1:                       | 1(C)  | 2(C):  | 1.702270 |
| # 2:                       | 1(C)  | 3(C):  | 1.111234 | # 2:                       | 1(C)  | 3(C):  | 1.104033 |
|                            |       |        |          | # 3:                       | 1(C)  | 33(H): | 0.833238 |



|                            |       |        |          |                            |       |        |          |
|----------------------------|-------|--------|----------|----------------------------|-------|--------|----------|
| # 3:                       | 1(C)  | 31(H): | 0.833592 | # 4:                       | 2(C)  | 4(C):  | 1.104026 |
| # 4:                       | 2(C)  | 4(C):  | 1.111234 | # 5:                       | 2(C)  | 34(H): | 0.833193 |
| # 5:                       | 2(C)  | 32(H): | 0.833592 | # 6:                       | 3(C)  | 5(C):  | 1.406543 |
| # 6:                       | 3(C)  | 5(C):  | 1.377112 | # 7:                       | 3(C)  | 9(C):  | 1.305131 |
| # 7:                       | 3(C)  | 9(C):  | 1.373422 | # 8:                       | 4(C)  | 10(C): | 1.406532 |
| # 8:                       | 4(C)  | 10(C): | 1.377112 | # 9:                       | 4(C)  | 14(C): | 1.305080 |
| # 9:                       | 4(C)  | 14(C): | 1.373422 | # 10:                      | 5(C)  | 6(C):  | 1.392215 |
| # 10:                      | 5(C)  | 6(C):  | 1.391285 | # 11:                      | 5(C)  | 15(N): | 0.675047 |
| # 11:                      | 5(C)  | 15(N): | 0.685037 | # 12:                      | 6(C)  | 7(N):  | 1.230431 |
| # 12:                      | 6(C)  | 7(N):  | 1.199116 | # 13:                      | 6(C)  | 27(N): | 0.908433 |
| # 13:                      | 6(C)  | 27(C): | 1.257213 | # 14:                      | 7(N)  | 8(C):  | 1.186216 |
| # 14:                      | 7(N)  | 8(C):  | 1.183598 | # 15:                      | 8(C)  | 9(C):  | 1.324554 |
| # 15:                      | 8(C)  | 9(C):  | 1.382793 | # 16:                      | 8(C)  | 39(N): | 0.889450 |
| # 16:                      | 8(C)  | 33(C): | 1.257807 | # 17:                      | 9(C)  | 21(N): | 0.694912 |
| # 17:                      | 9(C)  | 21(N): | 0.681675 | # 18:                      | 10(C) | 11(C): | 1.392194 |
| # 18:                      | 10(C) | 11(C): | 1.391285 | # 19:                      | 10(C) | 18(N): | 0.674975 |
| # 19:                      | 10(C) | 18(N): | 0.685037 | # 20:                      | 11(C) | 12(N): | 1.230467 |
| # 20:                      | 11(C) | 12(N): | 1.199116 | # 21:                      | 11(C) | 30(N): | 0.908411 |
| # 21:                      | 11(C) | 29(C): | 1.257213 | # 22:                      | 12(N) | 13(C): | 1.186168 |
| # 22:                      | 12(N) | 13(C): | 1.183598 | # 23:                      | 13(C) | 14(C): | 1.324596 |
| # 23:                      | 13(C) | 14(C): | 1.382793 | # 24:                      | 13(C) | 38(N): | 0.889402 |
| # 24:                      | 13(C) | 35(C): | 1.257807 | # 25:                      | 14(C) | 24(N): | 0.694912 |
| # 25:                      | 14(C) | 24(N): | 0.681675 | # 26:                      | 15(N) | 16(O): | 0.960436 |
| # 26:                      | 15(N) | 16(O): | 0.967808 | # 27:                      | 15(N) | 17(O): | 1.001399 |
| # 27:                      | 15(N) | 17(O): | 1.000915 | # 28:                      | 18(N) | 19(O): | 0.960269 |
| # 28:                      | 18(N) | 19(O): | 0.967808 | # 29:                      | 18(N) | 20(O): | 1.001661 |
| # 29:                      | 18(N) | 20(O): | 1.000915 | # 30:                      | 21(N) | 22(O): | 0.928110 |
| # 30:                      | 21(N) | 22(O): | 0.988737 | # 31:                      | 21(N) | 23(O): | 0.953534 |
| # 31:                      | 21(N) | 23(O): | 0.952852 | # 32:                      | 24(N) | 25(O): | 0.928100 |
| # 32:                      | 24(N) | 25(O): | 0.988737 | # 33:                      | 24(N) | 26(O): | 0.953521 |
| # 33:                      | 24(N) | 26(O): | 0.952852 | # 34:                      | 27(N) | 28(N): | 1.129668 |
| # 34:                      | 27(C) | 28(N): | 2.538581 | # 35:                      | 28(N) | 29(N): | 2.259476 |
| # 35:                      | 29(C) | 30(N): | 2.538581 | # 36:                      | 30(N) | 31(N): | 1.129693 |
| # 36:                      | 33(C) | 34(N): | 2.537639 | # 37:                      | 31(N) | 32(N): | 2.259468 |
| # 37:                      | 35(C) | 36(N): | 2.537639 | # 38:                      | 35(N) | 40(N): | 2.208448 |
|                            |       |        |          | # 39:                      | 36(N) | 37(N): | 2.208427 |
|                            |       |        |          | # 40:                      | 37(N) | 38(N): | 1.155296 |
|                            |       |        |          | # 41:                      | 39(N) | 40(N): | 1.155272 |
| # 17:                      | 9(C)  | 21(N): | 0.681675 | # 19:                      | 10(C) | 18(N): | 0.674975 |
| F3                         |       |        |          | F4                         |       |        |          |
| The bond order >= 0.050000 |       |        |          | The bond order >= 0.050000 |       |        |          |
| # 1:                       | 1(C)  | 2(C):  | 1.711936 | # 1:                       | 1(C)  | 2(C):  | 1.725343 |
| # 2:                       | 1(C)  | 3(C):  | 1.107848 | # 2:                       | 1(C)  | 3(C):  | 1.054876 |

|                            |       |        |          |                            |       |        |          |
|----------------------------|-------|--------|----------|----------------------------|-------|--------|----------|
| # 3:                       | 1(C)  | 33(H): | 0.833210 | # 3:                       | 1(C)  | 29(H): | 0.822738 |
| # 4:                       | 2(C)  | 4(C):  | 1.090982 | # 4:                       | 2(C)  | 4(C):  | 1.054872 |
| # 5:                       | 2(C)  | 34(H): | 0.827853 | # 5:                       | 2(C)  | 30(H): | 0.822737 |
| # 6:                       | 3(C)  | 5(C):  | 1.379980 | # 6:                       | 3(C)  | 5(C):  | 1.370892 |
| # 7:                       | 3(C)  | 9(C):  | 1.350987 | # 7:                       | 3(C)  | 9(C):  | 1.370611 |
| # 8:                       | 4(C)  | 10(C): | 1.375456 | # 8:                       | 4(C)  | 10(C): | 1.370614 |
| # 9:                       | 4(C)  | 14(C): | 1.336051 | # 9:                       | 4(C)  | 14(C): | 1.370838 |
| # 10:                      | 5(C)  | 6(C):  | 1.370149 | # 10:                      | 5(C)  | 6(C):  | 1.252326 |
| # 11:                      | 5(C)  | 15(N): | 0.671342 | # 11:                      | 5(C)  | 17(N): | 0.724295 |
| # 12:                      | 6(C)  | 7(N):  | 1.270266 | # 12:                      | 6(C)  | 7(N):  | 1.173974 |
| # 13:                      | 6(C)  | 27(N): | 0.874613 | # 13:                      | 6(C)  | 15(N): | 1.168607 |
| # 14:                      | 7(N)  | 8(C):  | 1.226719 | # 14:                      | 7(N)  | 8(C):  | 1.173885 |
| # 15:                      | 8(C)  | 9(C):  | 1.456872 | # 15:                      | 8(C)  | 9(C):  | 1.252221 |
| # 16:                      | 8(C)  | 35(N): | 0.858324 | # 16:                      | 8(C)  | 35(N): | 1.168706 |
| # 17:                      | 9(C)  | 21(N): | 0.684515 | # 17:                      | 9(C)  | 23(N): | 0.724495 |
| # 18:                      | 10(C) | 11(C): | 1.363755 | # 18:                      | 10(C) | 11(C): | 1.252128 |
| # 19:                      | 10(C) | 18(N): | 0.674324 | # 19:                      | 10(C) | 20(N): | 0.724557 |
| # 20:                      | 11(C) | 12(N): | 1.273644 | # 20:                      | 11(C) | 12(N): | 1.173980 |
| # 21:                      | 11(C) | 30(N): | 0.866584 | # 21:                      | 11(C) | 16(N): | 1.168682 |
| # 22:                      | 12(N) | 13(C): | 1.229737 | # 22:                      | 12(N) | 13(C): | 1.173882 |
| # 23:                      | 13(C) | 14(C): | 1.462200 | # 23:                      | 13(C) | 14(C): | 1.252431 |
| # 24:                      | 13(C) | 36(N): | 0.859265 | # 24:                      | 13(C) | 38(N): | 1.168683 |
| # 25:                      | 14(C) | 24(N): | 0.688782 | # 25:                      | 14(C) | 26(N): | 0.724270 |
| # 26:                      | 15(N) | 16(O): | 0.974583 | # 26:                      | 15(N) | 31(H): | 0.683844 |
| # 27:                      | 15(N) | 17(O): | 1.003769 | # 27:                      | 15(N) | 32(H): | 0.668866 |
| # 28:                      | 18(N) | 19(O): | 0.972823 | # 28:                      | 16(N) | 33(H): | 0.683847 |
| # 29:                      | 18(N) | 20(O): | 1.008744 | # 29:                      | 16(N) | 34(H): | 0.668758 |
| # 30:                      | 21(N) | 22(O): | 0.999312 | # 30:                      | 17(N) | 18(O): | 0.874294 |
| # 31:                      | 21(N) | 23(O): | 0.958773 | # 31:                      | 17(N) | 19(O): | 0.953098 |
| # 32:                      | 24(N) | 25(O): | 1.010441 | # 32:                      | 20(N) | 21(O): | 0.873856 |
| # 33:                      | 24(N) | 26(O): | 0.961047 | # 33:                      | 20(N) | 22(O): | 0.952849 |
| # 34:                      | 27(N) | 28(F): | 0.176781 | # 34:                      | 23(N) | 24(O): | 0.874037 |
| # 35:                      | 27(N) | 29(F): | 0.138466 | # 35:                      | 23(N) | 25(O): | 0.952882 |
| # 36:                      | 30(N) | 31(F): | 0.176657 | # 36:                      | 26(N) | 27(O): | 0.874407 |
| # 37:                      | 30(N) | 32(F): | 0.138046 | # 37:                      | 26(N) | 28(O): | 0.953077 |
| # 38:                      | 35(N) | 37(F): | 0.155117 | # 38:                      | 35(N) | 36(H): | 0.683870 |
| # 39:                      | 35(N) | 38(F): | 0.144773 | # 39:                      | 35(N) | 37(H): | 0.668764 |
| # 40:                      | 36(N) | 39(F): | 0.146237 | # 40:                      | 38(N) | 39(H): | 0.683868 |
| # 41:                      | 36(N) | 40(F): | 0.153786 | # 41:                      | 38(N) | 40(H): | 0.668840 |
| # 37:                      | 30(N) | 32(F): | 0.138046 | # 39:                      | 35(N) | 37(H): | 0.668764 |
| F5                         |       |        |          | F6                         |       |        |          |
| The bond order >= 0.050000 |       |        |          | The bond order >= 0.050000 |       |        |          |
| # 1:                       | 1(C)  | 2(C):  | 1.729899 | # 1:                       | 1(C)  | 2(C):  | 1.719865 |

---

|   |     |       |        |          |   |     |       |        |          |
|---|-----|-------|--------|----------|---|-----|-------|--------|----------|
| # | 2:  | 1(C)  | 3(C):  | 1.053127 | # | 2:  | 1(C)  | 3(C):  | 1.051040 |
| # | 3:  | 1(C)  | 35(H): | 0.822212 | # | 3:  | 1(C)  | 31(H): | 0.821633 |
| # | 4:  | 2(C)  | 4(C):  | 1.053126 | # | 4:  | 2(C)  | 4(C):  | 1.051040 |
| # | 5:  | 2(C)  | 36(H): | 0.822212 | # | 5:  | 2(C)  | 32(H): | 0.821633 |
| # | 6:  | 3(C)  | 5(C):  | 1.375891 | # | 6:  | 3(C)  | 5(C):  | 1.369679 |
| # | 7:  | 3(C)  | 9(C):  | 1.376399 | # | 7:  | 3(C)  | 9(C):  | 1.369679 |
| # | 8:  | 4(C)  | 10(C): | 1.375846 | # | 8:  | 4(C)  | 10(C): | 1.369679 |
| # | 9:  | 4(C)  | 14(C): | 1.376436 | # | 9:  | 4(C)  | 14(C): | 1.369679 |
| # | 10: | 5(C)  | 6(C):  | 1.282340 | # | 10: | 5(C)  | 6(C):  | 1.236470 |
| # | 11: | 5(C)  | 15(N): | 0.700305 | # | 11: | 5(C)  | 15(N): | 0.728782 |
| # | 12: | 6(C)  | 7(N):  | 1.220285 | # | 12: | 6(C)  | 7(N):  | 1.153883 |
| # | 13: | 6(C)  | 27(N): | 0.992977 | # | 13: | 6(C)  | 27(N): | 1.124833 |
| # | 14: | 7(N)  | 8(C):  | 1.220707 | # | 14: | 7(N)  | 8(C):  | 1.153883 |
| # | 15: | 8(C)  | 9(C):  | 1.281955 | # | 15: | 8(C)  | 9(C):  | 1.236470 |
| # | 16: | 8(C)  | 43(N): | 0.992974 | # | 16: | 8(C)  | 47(N): | 1.124833 |
| # | 17: | 9(C)  | 21(N): | 0.700212 | # | 17: | 9(C)  | 21(N): | 0.728782 |
| # | 18: | 10(C) | 11(C): | 1.282358 | # | 18: | 10(C) | 11(C): | 1.236470 |
| # | 19: | 10(C) | 18(N): | 0.700314 | # | 19: | 10(C) | 18(N): | 0.728782 |
| # | 20: | 11(C) | 12(N): | 1.220271 | # | 20: | 11(C) | 12(N): | 1.153883 |
| # | 21: | 11(C) | 31(N): | 0.992993 | # | 21: | 11(C) | 29(N): | 1.124833 |
| # | 22: | 12(N) | 13(C): | 1.220728 | # | 22: | 12(N) | 13(C): | 1.153883 |
| # | 23: | 13(C) | 14(C): | 1.281887 | # | 23: | 13(C) | 14(C): | 1.236470 |
| # | 24: | 13(C) | 41(N): | 0.992985 | # | 24: | 13(C) | 46(N): | 1.124833 |
| # | 25: | 14(C) | 24(N): | 0.700201 | # | 25: | 14(C) | 24(N): | 0.728782 |
| # | 26: | 15(N) | 16(O): | 0.974266 | # | 26: | 15(N) | 16(O): | 0.875235 |
| # | 27: | 15(N) | 17(O): | 0.909273 | # | 27: | 15(N) | 17(O): | 0.951809 |
| # | 28: | 18(N) | 19(O): | 0.909249 | # | 28: | 18(N) | 19(O): | 0.875235 |
| # | 29: | 18(N) | 20(O): | 0.974267 | # | 29: | 18(N) | 20(O): | 0.951809 |
| # | 30: | 21(N) | 22(O): | 0.909489 | # | 30: | 21(N) | 22(O): | 0.875235 |
| # | 31: | 21(N) | 23(O): | 0.974371 | # | 31: | 21(N) | 23(O): | 0.951809 |
| # | 32: | 24(N) | 25(O): | 0.909509 | # | 32: | 24(N) | 25(O): | 0.875235 |
| # | 33: | 24(N) | 26(O): | 0.974377 | # | 33: | 24(N) | 26(O): | 0.951809 |
| # | 34: | 27(N) | 28(N): | 0.559340 | # | 34: | 27(N) | 28(N): | 0.620174 |
| # | 35: | 27(N) | 37(H): | 0.642370 | # | 35: | 27(N) | 33(H): | 0.668351 |
| # | 36: | 28(N) | 29(O): | 0.983741 | # | 36: | 28(N) | 34(H): | 0.694936 |
| # | 37: | 28(N) | 30(O): | 1.052411 | # | 37: | 28(N) | 35(H): | 0.691669 |
| # | 38: | 31(N) | 32(N): | 0.559298 | # | 38: | 29(N) | 30(N): | 0.620174 |
| # | 39: | 31(N) | 38(H): | 0.642373 | # | 39: | 29(N) | 36(H): | 0.668351 |
| # | 40: | 32(N) | 33(O): | 0.983742 | # | 40: | 30(N) | 37(H): | 0.691669 |
| # | 41: | 32(N) | 34(O): | 1.052405 | # | 41: | 30(N) | 38(H): | 0.694936 |
| # | 42: | 39(H) | 43(N): | 0.642298 | # | 42: | 39(H) | 47(N): | 0.668351 |
| # | 43: | 40(H) | 41(N): | 0.642302 | # | 43: | 40(H) | 48(N): | 0.694936 |
| # | 44: | 41(N) | 42(N): | 0.559866 | # | 44: | 41(H) | 48(N): | 0.691669 |
| # | 45: | 42(N) | 45(O): | 0.983804 | # | 45: | 42(H) | 46(N): | 0.668351 |
| # | 46: | 42(N) | 46(O): | 1.052757 | # | 46: | 43(H) | 45(N): | 0.694936 |

---

|                            |       |        |          |                            |       |        |          |
|----------------------------|-------|--------|----------|----------------------------|-------|--------|----------|
| # 47:                      | 43(N) | 44(N): | 0.559868 | # 47:                      | 44(H) | 45(N): | 0.691669 |
| # 48:                      | 44(N) | 47(O): | 1.052733 | # 48:                      | 45(N) | 46(N): | 0.620174 |
| # 49:                      | 44(N) | 48(O): | 0.983796 | # 49:                      | 47(N) | 48(N): | 0.620174 |
| # 38:                      | 31(N) | 32(N): | 0.559298 | # 34:                      | 27(N) | 28(N): | 0.620174 |
| F7                         |       |        |          | F8                         |       |        |          |
| The bond order >= 0.050000 |       |        |          | The bond order >= 0.050000 |       |        |          |
| # 1:                       | 1(C)  | 2(C):  | 1.703525 | # 1:                       | 1(C)  | 2(C):  | 1.728006 |
| # 2:                       | 1(C)  | 3(C):  | 1.069575 | # 2:                       | 1(C)  | 3(C):  | 1.053762 |
| # 3:                       | 1(C)  | 41(H): | 0.822075 | # 3:                       | 1(C)  | 40(H): | 0.819206 |
| # 4:                       | 2(C)  | 4(C):  | 1.086192 | # 4:                       | 2(C)  | 4(C):  | 1.053762 |
| # 5:                       | 2(C)  | 42(H): | 0.826493 | # 5:                       | 2(C)  | 41(H): | 0.819203 |
| # 6:                       | 3(C)  | 5(C):  | 1.367611 | # 6:                       | 3(C)  | 5(C):  | 1.386820 |
| # 7:                       | 3(C)  | 9(C):  | 1.366320 | # 7:                       | 3(C)  | 9(C):  | 1.386644 |
| # 8:                       | 4(C)  | 10(C): | 1.373993 | # 8:                       | 4(C)  | 10(C): | 1.386852 |
| # 9:                       | 4(C)  | 14(C): | 1.357222 | # 9:                       | 4(C)  | 14(C): | 1.386652 |
| # 10:                      | 5(C)  | 6(C):  | 1.407266 | # 10:                      | 5(C)  | 6(C):  | 1.388729 |
| # 11:                      | 5(C)  | 15(N): | 0.663770 | # 11:                      | 5(C)  | 15(N): | 0.684379 |
| # 12:                      | 6(C)  | 7(N):  | 1.206899 | # 12:                      | 6(C)  | 7(N):  | 1.199851 |
| # 13:                      | 6(C)  | 27(C): | 1.026398 | # 13:                      | 6(C)  | 26(C): | 1.014739 |
| # 14:                      | 7(N)  | 8(C):  | 1.204532 | # 14:                      | 7(N)  | 8(C):  | 1.199666 |
| # 15:                      | 8(C)  | 9(C):  | 1.385726 | # 15:                      | 8(C)  | 9(C):  | 1.388692 |
| # 16:                      | 8(C)  | 45(C): | 1.022667 | # 16:                      | 8(C)  | 42(C): | 1.014689 |
| # 17:                      | 9(C)  | 21(N): | 0.674804 | # 17:                      | 9(C)  | 21(N): | 0.684478 |
| # 18:                      | 10(C) | 11(C): | 1.416215 | # 18:                      | 10(C) | 11(C): | 1.388645 |
| # 19:                      | 10(C) | 18(N): | 0.678100 | # 19:                      | 10(C) | 18(N): | 0.684417 |
| # 20:                      | 11(C) | 12(N): | 1.218262 | # 20:                      | 11(C) | 12(N): | 1.199880 |
| # 21:                      | 11(C) | 34(C): | 1.042516 | # 21:                      | 11(C) | 33(C): | 1.014717 |
| # 22:                      | 12(N) | 13(C): | 1.209118 | # 22:                      | 12(N) | 13(C): | 1.199639 |
| # 23:                      | 13(C) | 14(C): | 1.386398 | # 23:                      | 13(C) | 14(C): | 1.388714 |
| # 24:                      | 13(C) | 47(C): | 1.031790 | # 24:                      | 13(C) | 43(C): | 1.014724 |
| # 25:                      | 14(C) | 24(N): | 0.672972 | # 25:                      | 14(C) | 23(N): | 0.684489 |
| # 26:                      | 15(N) | 16(O): | 1.010808 | # 26:                      | 15(N) | 16(O): | 0.966859 |
| # 27:                      | 15(N) | 17(O): | 0.949450 | # 27:                      | 15(N) | 17(O): | 1.000460 |
| # 28:                      | 18(N) | 19(O): | 1.005643 | # 28:                      | 18(N) | 19(O): | 1.000470 |
| # 29:                      | 18(N) | 20(O): | 0.946288 | # 29:                      | 18(N) | 20(O): | 0.966921 |
| # 30:                      | 21(N) | 22(O): | 0.951739 | # 30:                      | 21(N) | 22(O): | 1.000500 |
| # 31:                      | 21(N) | 23(O): | 1.002007 | # 31:                      | 21(N) | 66(O): | 0.966865 |
| # 32:                      | 24(N) | 25(O): | 0.951667 | # 32:                      | 23(N) | 24(O): | 0.966773 |
| # 33:                      | 24(N) | 26(O): | 0.978290 | # 33:                      | 23(N) | 25(O): | 1.000493 |
| # 34:                      | 27(C) | 28(N): | 0.526888 | # 34:                      | 26(C) | 27(N): | 0.455244 |
| # 35:                      | 27(C) | 31(N): | 0.555687 | # 35:                      | 26(C) | 30(N): | 0.525118 |
| # 36:                      | 27(C) | 43(H): | 0.832737 | # 36:                      | 26(C) | 57(N): | 0.464653 |
| # 37:                      | 28(N) | 29(O): | 0.970702 | # 37:                      | 27(N) | 28(O): | 1.045385 |

|                            |       |        |          |                            |       |        |          |
|----------------------------|-------|--------|----------|----------------------------|-------|--------|----------|
| # 38:                      | 28(N) | 30(O): | 1.040155 | # 38:                      | 27(N) | 29(O): | 1.028001 |
| # 39:                      | 31(N) | 32(O): | 1.004669 | # 39:                      | 30(N) | 31(O): | 0.978472 |
| # 40:                      | 31(N) | 33(O): | 1.022690 | # 40:                      | 30(N) | 32(O): | 1.046703 |
| # 41:                      | 34(C) | 35(N): | 0.531606 | # 41:                      | 33(C) | 34(N): | 0.455302 |
| # 42:                      | 34(C) | 38(N): | 0.546871 | # 42:                      | 33(C) | 37(N): | 0.525099 |
| # 43:                      | 34(C) | 44(H): | 0.832234 | # 43:                      | 33(C) | 59(N): | 0.464594 |
| # 44:                      | 35(N) | 36(O): | 0.990093 | # 44:                      | 34(N) | 35(O): | 1.045396 |
| # 45:                      | 35(N) | 37(O): | 1.024759 | # 45:                      | 34(N) | 36(O): | 1.028000 |
| # 46:                      | 38(N) | 39(O): | 0.993515 | # 46:                      | 37(N) | 38(O): | 0.978485 |
| # 47:                      | 38(N) | 40(O): | 1.029422 | # 47:                      | 37(N) | 39(O): | 1.046695 |
| # 48:                      | 45(C) | 46(H): | 0.832593 | # 48:                      | 42(C) | 44(N): | 0.455155 |
| # 49:                      | 45(C) | 49(N): | 0.548356 | # 49:                      | 42(C) | 45(N): | 0.526164 |
| # 50:                      | 45(C) | 50(N): | 0.524957 | # 50:                      | 42(C) | 56(N): | 0.463491 |
| # 51:                      | 47(C) | 48(H): | 0.836113 | # 51:                      | 43(C) | 46(N): | 0.526239 |
| # 52:                      | 47(C) | 51(N): | 0.542762 | # 52:                      | 43(C) | 47(N): | 0.455337 |
| # 53:                      | 47(C) | 52(N): | 0.539924 | # 53:                      | 43(C) | 58(N): | 0.463318 |
| # 54:                      | 49(N) | 57(O): | 1.014971 | # 54:                      | 44(N) | 52(O): | 1.028111 |
| # 55:                      | 49(N) | 58(O): | 1.007334 | # 55:                      | 44(N) | 53(O): | 1.045582 |
| # 56:                      | 50(N) | 59(O): | 0.982578 | # 56:                      | 45(N) | 54(O): | 0.978195 |
| # 57:                      | 50(N) | 60(O): | 1.033493 | # 57:                      | 45(N) | 55(O): | 1.046495 |
| # 58:                      | 51(N) | 53(O): | 1.024654 | # 58:                      | 46(N) | 48(O): | 1.046417 |
| # 59:                      | 51(N) | 54(O): | 0.987176 | # 59:                      | 46(N) | 49(O): | 0.978242 |
| # 60:                      | 52(N) | 55(O): | 1.030871 | # 60:                      | 47(N) | 50(O): | 1.027963 |
| # 61:                      | 52(N) | 56(O): | 0.994093 | # 61:                      | 47(N) | 51(O): | 1.045679 |
|                            |       |        |          | # 62:                      | 56(N) | 67(O): | 0.989487 |
|                            |       |        |          | # 63:                      | 56(N) | 68(O): | 1.080007 |
|                            |       |        |          | # 64:                      | 57(N) | 60(O): | 0.988897 |
| # 50:                      | 45(C) | 50(N): | 0.524957 | # 65:                      | 57(N) | 61(O): | 1.079834 |
|                            |       |        |          | # 66:                      | 58(N) | 62(O): | 1.080055 |
|                            |       |        |          | # 67:                      | 58(N) | 63(O): | 0.989451 |
|                            |       |        |          | # 68:                      | 59(N) | 64(O): | 0.988870 |
|                            |       |        |          | # 69:                      | 59(N) | 65(O): | 1.079984 |
|                            |       |        |          | # 48:                      | 42(C) | 44(N): | 0.455155 |
| F9                         |       |        |          | F10                        |       |        |          |
| The bond order >= 0.050000 |       |        |          | The bond order >= 0.050000 |       |        |          |
| # 1:                       | 1(C)  | 2(C):  | 1.711518 | # 1:                       | 1(C)  | 2(C):  | 1.713778 |
| # 2:                       | 1(C)  | 3(C):  | 1.109726 | # 2:                       | 1(C)  | 3(C):  | 1.096758 |
| # 3:                       | 1(C)  | 83(H): | 0.838729 | # 3:                       | 1(C)  | 75(H): | 0.831536 |
| # 4:                       | 2(C)  | 4(C):  | 1.100017 | # 4:                       | 2(C)  | 4(C):  | 1.085831 |
| # 5:                       | 2(C)  | 84(H): | 0.824301 | # 5:                       | 2(C)  | 76(H): | 0.823207 |
| # 6:                       | 3(C)  | 5(C):  | 1.366765 | # 6:                       | 3(C)  | 5(C):  | 1.362756 |
| # 7:                       | 3(C)  | 9(C):  | 1.358344 | # 7:                       | 3(C)  | 9(C):  | 1.358602 |
| # 8:                       | 4(C)  | 10(C): | 1.355694 | # 8:                       | 4(C)  | 10(C): | 1.330719 |

---

|       |       |        |          |       |       |        |          |
|-------|-------|--------|----------|-------|-------|--------|----------|
| # 9:  | 4(C)  | 14(C): | 1.341455 | # 9:  | 4(C)  | 14(C): | 1.383557 |
| # 10: | 5(C)  | 6(C):  | 1.435121 | # 10: | 5(C)  | 6(C):  | 1.380031 |
| # 11: | 5(C)  | 35(N): | 0.674053 | # 11: | 5(C)  | 39(N): | 0.668786 |
| # 12: | 6(C)  | 7(N):  | 1.262639 | # 12: | 6(C)  | 7(N):  | 1.174907 |
| # 13: | 6(C)  | 17(N): | 0.796935 | # 13: | 6(C)  | 35(N): | 0.901924 |
| # 14: | 7(N)  | 8(C):  | 1.263671 | # 14: | 7(N)  | 8(C):  | 1.181193 |
| # 15: | 8(C)  | 9(C):  | 1.435450 | # 15: | 8(C)  | 9(C):  | 1.404059 |
| # 16: | 8(C)  | 21(N): | 0.790152 | # 16: | 8(C)  | 16(N): | 0.897312 |
| # 17: | 9(C)  | 41(N): | 0.674589 | # 17: | 9(C)  | 45(N): | 0.681232 |
| # 18: | 10(C) | 11(C): | 1.390528 | # 18: | 10(C) | 11(C): | 1.434463 |
| # 19: | 10(C) | 38(N): | 0.674721 | # 19: | 10(C) | 42(N): | 0.673878 |
| # 20: | 11(C) | 12(N): | 1.245425 | # 20: | 11(C) | 12(N): | 1.211487 |
| # 21: | 11(C) | 32(N): | 0.835879 | # 21: | 11(C) | 29(N): | 0.820680 |
| # 22: | 12(N) | 13(C): | 1.256142 | # 22: | 12(N) | 13(C): | 1.212612 |
| # 23: | 13(C) | 14(C): | 1.453275 | # 23: | 13(C) | 14(C): | 1.361509 |
| # 24: | 13(C) | 26(N): | 0.790911 | # 24: | 13(C) | 22(N): | 0.930526 |
| # 25: | 14(C) | 44(N): | 0.676119 | # 25: | 14(C) | 48(N): | 0.672473 |
| # 26: | 15(C) | 16(N): | 1.314633 | # 26: | 15(C) | 16(N): | 0.902323 |
| # 27: | 15(C) | 19(C): | 1.267782 | # 27: | 15(C) | 19(C): | 1.367969 |
| # 28: | 15(C) | 47(N): | 0.754647 | # 28: | 15(C) | 20(N): | 1.162163 |
| # 29: | 16(N) | 17(N): | 0.790990 | # 29: | 16(N) | 17(N): | 0.615450 |
| # 30: | 17(N) | 18(C): | 0.922506 | # 30: | 17(N) | 18(C): | 1.423116 |
| # 31: | 18(C) | 19(C): | 1.446167 | # 31: | 18(C) | 19(C): | 1.225614 |
| # 32: | 18(C) | 50(N): | 0.796292 | # 32: | 18(C) | 51(N): | 0.741900 |
| # 33: | 19(C) | 53(N): | 0.739558 | # 33: | 19(C) | 54(N): | 0.856082 |
| # 34: | 20(C) | 21(N): | 0.930858 | # 34: | 20(N) | 77(H): | 0.677183 |
| # 35: | 20(C) | 24(C): | 1.438734 | # 35: | 20(N) | 78(H): | 0.654224 |
| # 36: | 20(C) | 56(N): | 0.810110 | # 36: | 21(C) | 22(N): | 0.872296 |
| # 37: | 21(N) | 22(N): | 0.800148 | # 37: | 21(C) | 25(C): | 1.353796 |
| # 38: | 22(N) | 23(C): | 1.305924 | # 38: | 21(C) | 26(N): | 1.211118 |
| # 39: | 23(C) | 24(C): | 1.276271 | # 39: | 22(N) | 23(N): | 0.604928 |
| # 40: | 23(C) | 59(N): | 0.758565 | # 40: | 23(N) | 24(C): | 1.419174 |
| # 41: | 24(C) | 62(N): | 0.733363 | # 41: | 24(C) | 25(C): | 1.230905 |
| # 42: | 25(C) | 26(N): | 0.934579 | # 42: | 24(C) | 57(N): | 0.748125 |
| # 43: | 25(C) | 29(C): | 1.440216 | # 43: | 25(C) | 60(N): | 0.861226 |
| # 44: | 25(C) | 65(N): | 0.810470 | # 44: | 26(N) | 79(H): | 0.667740 |
| # 45: | 26(N) | 27(N): | 0.804600 | # 45: | 26(N) | 80(H): | 0.656773 |
| # 46: | 27(N) | 28(C): | 1.300933 | # 46: | 27(C) | 28(N): | 1.416777 |
| # 47: | 28(C) | 29(C): | 1.274049 | # 47: | 27(C) | 31(C): | 1.233027 |
| # 48: | 28(C) | 68(N): | 0.758688 | # 48: | 27(C) | 63(N): | 0.744285 |
| # 49: | 29(C) | 71(N): | 0.734671 | # 49: | 28(N) | 29(N): | 0.590586 |
| # 50: | 30(C) | 31(N): | 1.365785 | # 50: | 29(N) | 30(C): | 0.897784 |
| # 51: | 30(C) | 34(C): | 1.236267 | # 51: | 30(C) | 31(C): | 1.354725 |
| # 52: | 30(C) | 74(N): | 0.744672 | # 52: | 30(C) | 32(N): | 1.170971 |
| # 53: | 31(N) | 32(N): | 0.728987 | # 53: | 31(C) | 66(N): | 0.852316 |

---

|                            |       |        |          |                            |       |        |          |
|----------------------------|-------|--------|----------|----------------------------|-------|--------|----------|
| # 54:                      | 32(N) | 33(C): | 0.935675 | # 54:                      | 32(N) | 81(H): | 0.663284 |
| # 55:                      | 33(C) | 34(C): | 1.459910 | # 55:                      | 32(N) | 82(H): | 0.655163 |
| # 56:                      | 33(C) | 77(N): | 0.749729 | # 56:                      | 33(C) | 34(N): | 1.417972 |
| # 57:                      | 34(C) | 80(N): | 0.775258 | # 57:                      | 33(C) | 37(C): | 1.228016 |
| # 58:                      | 35(N) | 36(O): | 0.963028 | # 58:                      | 33(C) | 69(N): | 0.744731 |
| # 59:                      | 35(N) | 37(O): | 1.013995 | # 59:                      | 34(N) | 35(N): | 0.615171 |
| # 60:                      | 38(N) | 39(O): | 1.012053 | # 60:                      | 35(N) | 36(C): | 0.880311 |
| # 61:                      | 38(N) | 40(O): | 0.990422 | # 61:                      | 36(C) | 37(C): | 1.360006 |
| # 62:                      | 41(N) | 42(O): | 0.975846 | # 62:                      | 36(C) | 38(N): | 1.183717 |
| # 63:                      | 41(N) | 43(O): | 0.980771 | # 63:                      | 37(C) | 72(N): | 0.852684 |
| # 64:                      | 44(N) | 45(O): | 0.975089 | # 64:                      | 38(N) | 83(H): | 0.673021 |
| # 65:                      | 44(N) | 46(O): | 0.975886 | # 65:                      | 38(N) | 84(H): | 0.656656 |
| # 66:                      | 47(N) | 48(O): | 1.007465 | # 66:                      | 39(N) | 40(O): | 0.974846 |
| # 67:                      | 47(N) | 49(O): | 0.960739 | # 67:                      | 39(N) | 41(O): | 1.009702 |
| # 68:                      | 50(N) | 51(O): | 0.944164 | # 68:                      | 42(N) | 43(O): | 0.958660 |
| # 69:                      | 50(N) | 52(O): | 0.985450 | # 69:                      | 42(N) | 44(O): | 1.001116 |
| # 70:                      | 53(N) | 54(O): | 1.009427 | # 70:                      | 45(N) | 46(O): | 0.986587 |
| # 71:                      | 53(N) | 55(O): | 1.011912 | # 71:                      | 45(N) | 47(O): | 0.980381 |
| # 72:                      | 56(N) | 57(O): | 0.934078 | # 72:                      | 48(N) | 49(O): | 0.973838 |
| # 73:                      | 56(N) | 58(O): | 0.986947 | # 73:                      | 48(N) | 50(O): | 1.010363 |
| # 74:                      | 59(N) | 60(O): | 1.003759 | # 74:                      | 51(N) | 52(O): | 0.997419 |
| # 75:                      | 59(N) | 61(O): | 0.956429 | # 75:                      | 51(N) | 53(O): | 0.992768 |
| # 76:                      | 62(N) | 63(O): | 1.011120 | # 76:                      | 54(N) | 55(O): | 0.977803 |
| # 77:                      | 62(N) | 64(O): | 1.010296 | # 77:                      | 54(N) | 56(O): | 0.856443 |
| # 78:                      | 65(N) | 66(O): | 0.928527 | # 78:                      | 57(N) | 58(O): | 0.997893 |
| # 79:                      | 65(N) | 67(O): | 0.994661 | # 79:                      | 57(N) | 59(O): | 0.987265 |
| # 80:                      | 68(N) | 69(O): | 1.005858 | # 80:                      | 60(N) | 61(O): | 0.967898 |
| # 81:                      | 68(N) | 70(O): | 0.955807 | # 81:                      | 60(N) | 62(O): | 0.859663 |
| # 82:                      | 71(N) | 72(O): | 1.012993 | # 82:                      | 63(N) | 64(O): | 0.997274 |
| # 83:                      | 71(N) | 73(O): | 1.009068 | # 83:                      | 63(N) | 65(O): | 0.985045 |
| # 84:                      | 74(N) | 75(O): | 0.997339 | # 84:                      | 66(N) | 67(O): | 0.862602 |
| # 85:                      | 74(N) | 76(O): | 0.979687 | # 85:                      | 66(N) | 68(O): | 0.964622 |
| # 86:                      | 77(N) | 78(O): | 0.983506 | # 86:                      | 69(N) | 70(O): | 0.996115 |
| # 87:                      | 77(N) | 79(O): | 1.018117 | # 87:                      | 69(N) | 71(O): | 0.994713 |
| # 88:                      | 80(N) | 81(O): | 0.987309 | # 88:                      | 72(N) | 73(O): | 0.856582 |
| # 89:                      | 80(N) | 82(O): | 0.961836 | # 89:                      | 72(N) | 74(O): | 0.971190 |
| # 11:                      | 5(C)  | 35(N): | 0.674053 | # 49:                      | 28(N) | 29(N): | 0.590586 |
| F11                        |       |        |          | F12                        |       |        |          |
| The bond order >= 0.050000 |       |        |          | The bond order >= 0.050000 |       |        |          |
| # 1:                       | 1(C)  | 2(C):  | 1.739258 | # 1:                       | 1(C)  | 2(C):  | 1.719727 |
| # 2:                       | 1(C)  | 3(C):  | 1.076188 | # 2:                       | 1(C)  | 3(C):  | 1.071928 |
| # 3:                       | 1(C)  | 67(H): | 0.823895 | # 3:                       | 1(C)  | 63(H): | 0.829017 |
| # 4:                       | 2(C)  | 4(C):  | 1.073874 | # 4:                       | 2(C)  | 4(C):  | 1.075082 |

---

|   |     |       |        |          |   |     |       |        |          |
|---|-----|-------|--------|----------|---|-----|-------|--------|----------|
| # | 5:  | 2(C)  | 68(H): | 0.827847 | # | 5:  | 2(C)  | 64(H): | 0.820408 |
| # | 6:  | 3(C)  | 5(C):  | 1.361358 | # | 6:  | 3(C)  | 5(C):  | 1.299082 |
| # | 7:  | 3(C)  | 9(C):  | 1.355547 | # | 7:  | 3(C)  | 9(C):  | 1.403296 |
| # | 8:  | 4(C)  | 10(C): | 1.362019 | # | 8:  | 4(C)  | 10(C): | 1.337665 |
| # | 9:  | 4(C)  | 14(C): | 1.353719 | # | 9:  | 4(C)  | 14(C): | 1.392137 |
| # | 10: | 5(C)  | 6(C):  | 1.406094 | # | 10: | 5(C)  | 6(C):  | 1.362037 |
| # | 11: | 5(C)  | 39(N): | 0.681508 | # | 11: | 5(C)  | 39(N): | 0.725782 |
| # | 12: | 6(C)  | 7(N):  | 1.260925 | # | 12: | 6(C)  | 7(N):  | 1.224178 |
| # | 13: | 6(C)  | 35(N): | 0.826840 | # | 13: | 6(C)  | 17(N): | 0.827582 |
| # | 14: | 7(N)  | 8(C):  | 1.256184 | # | 14: | 7(N)  | 8(C):  | 1.222245 |
| # | 15: | 8(C)  | 9(C):  | 1.418781 | # | 15: | 8(C)  | 9(C):  | 1.347955 |
| # | 16: | 8(C)  | 16(N): | 0.823552 | # | 16: | 8(C)  | 29(N): | 0.969155 |
| # | 17: | 9(C)  | 45(N): | 0.683212 | # | 17: | 9(C)  | 45(N): | 0.665416 |
| # | 18: | 10(C) | 11(C): | 1.393993 | # | 18: | 10(C) | 11(C): | 1.421484 |
| # | 19: | 10(C) | 42(N): | 0.687141 | # | 19: | 10(C) | 42(N): | 0.670043 |
| # | 20: | 11(C) | 12(N): | 1.255616 | # | 20: | 11(C) | 12(N): | 1.215857 |
| # | 21: | 11(C) | 29(N): | 0.797810 | # | 21: | 11(C) | 35(N): | 0.835559 |
| # | 22: | 12(N) | 13(C): | 1.259201 | # | 22: | 12(N) | 13(C): | 1.212544 |
| # | 23: | 13(C) | 14(C): | 1.422421 | # | 23: | 13(C) | 14(C): | 1.360611 |
| # | 24: | 13(C) | 22(N): | 0.827971 | # | 24: | 13(C) | 23(N): | 0.937826 |
| # | 25: | 14(C) | 48(N): | 0.679764 | # | 25: | 14(C) | 48(N): | 0.678665 |
| # | 26: | 15(C) | 16(N): | 0.849193 | # | 26: | 15(C) | 16(N): | 1.422587 |
| # | 27: | 15(C) | 19(C): | 1.356412 | # | 27: | 15(C) | 19(N): | 1.105446 |
| # | 28: | 15(C) | 20(N): | 0.890774 | # | 28: | 15(C) | 51(N): | 0.742895 |
| # | 29: | 16(N) | 17(N): | 0.851823 | # | 29: | 16(N) | 17(N): | 0.656378 |
| # | 30: | 17(N) | 18(C): | 1.296036 | # | 30: | 17(N) | 18(C): | 0.832825 |
| # | 31: | 18(C) | 19(C): | 1.215576 | # | 31: | 18(C) | 19(N): | 1.287073 |
| # | 32: | 18(C) | 51(N): | 0.806610 | # | 32: | 18(C) | 20(N): | 1.101817 |
| # | 33: | 19(C) | 54(N): | 1.165061 | # | 33: | 20(N) | 65(H): | 0.653651 |
| # | 34: | 20(N) | 75(O): | 0.928044 | # | 34: | 20(N) | 66(H): | 0.680501 |
| # | 35: | 20(N) | 76(O): | 0.869660 | # | 35: | 21(C) | 22(N): | 1.395872 |
| # | 36: | 21(C) | 22(N): | 0.841546 | # | 36: | 21(C) | 25(N): | 1.092441 |
| # | 37: | 21(C) | 25(C): | 1.358854 | # | 37: | 21(C) | 54(N): | 0.734988 |
| # | 38: | 21(C) | 26(N): | 0.887573 | # | 38: | 22(N) | 23(N): | 0.644448 |
| # | 39: | 22(N) | 23(N): | 0.836418 | # | 39: | 23(N) | 24(C): | 0.820072 |
| # | 40: | 23(N) | 24(C): | 1.304561 | # | 40: | 24(C) | 25(N): | 1.271907 |
| # | 41: | 24(C) | 25(C): | 1.212062 | # | 41: | 24(C) | 26(N): | 1.188651 |
| # | 42: | 24(C) | 55(N): | 0.801840 | # | 42: | 26(N) | 67(H): | 0.661596 |
| # | 43: | 25(C) | 58(N): | 1.164606 | # | 43: | 26(N) | 68(H): | 0.679762 |
| # | 44: | 26(N) | 71(O): | 0.869808 | # | 44: | 27(C) | 28(N): | 1.394349 |
| # | 45: | 26(N) | 72(O): | 0.935007 | # | 45: | 27(C) | 31(N): | 1.105713 |
| # | 46: | 27(C) | 28(N): | 1.312851 | # | 46: | 27(C) | 57(N): | 0.734037 |
| # | 47: | 27(C) | 31(C): | 1.214883 | # | 47: | 28(N) | 29(N): | 0.642837 |
| # | 48: | 27(C) | 59(N): | 0.802396 | # | 48: | 29(N) | 30(C): | 0.786051 |
| # | 49: | 28(N) | 29(N): | 0.850765 | # | 49: | 30(C) | 31(N): | 1.261333 |

---



---

|       |       |        |          |       |       |        |          |
|-------|-------|--------|----------|-------|-------|--------|----------|
| # 50: | 29(N) | 30(C): | 0.834173 | # 50: | 30(C) | 32(N): | 1.213613 |
| # 51: | 30(C) | 31(C): | 1.358681 | # 51: | 32(N) | 69(H): | 0.648977 |
| # 52: | 30(C) | 32(N): | 0.920731 | # 52: | 32(N) | 70(H): | 0.677322 |
| # 53: | 31(C) | 62(N): | 1.168497 | # 53: | 33(C) | 34(N): | 1.411200 |
| # 54: | 32(N) | 73(O): | 0.883712 | # 54: | 33(C) | 37(N): | 1.099262 |
| # 55: | 32(N) | 74(O): | 0.888752 | # 55: | 33(C) | 60(N): | 0.742219 |
| # 56: | 33(C) | 34(N): | 1.300824 | # 56: | 34(N) | 35(N): | 0.629286 |
| # 57: | 33(C) | 37(C): | 1.210638 | # 57: | 35(N) | 36(C): | 0.837570 |
| # 58: | 33(C) | 63(N): | 0.802172 | # 58: | 36(C) | 37(N): | 1.263359 |
| # 59: | 34(N) | 35(N): | 0.836733 | # 59: | 36(C) | 38(N): | 1.147040 |
| # 60: | 35(N) | 36(C): | 0.842455 | # 60: | 38(N) | 71(H): | 0.661331 |
| # 61: | 36(C) | 37(C): | 1.358243 | # 61: | 38(N) | 72(H): | 0.675864 |
| # 62: | 36(C) | 38(N): | 0.888024 | # 62: | 39(N) | 40(O): | 0.966159 |
| # 63: | 37(C) | 66(N): | 1.163019 | # 63: | 39(N) | 41(O): | 0.911122 |
| # 64: | 38(N) | 69(O): | 0.867964 | # 64: | 42(N) | 43(O): | 1.003085 |
| # 65: | 38(N) | 70(O): | 0.932321 | # 65: | 42(N) | 44(O): | 0.953652 |
| # 66: | 39(N) | 40(O): | 0.984188 | # 66: | 45(N) | 46(O): | 0.982627 |
| # 67: | 39(N) | 41(O): | 0.979643 | # 67: | 45(N) | 47(O): | 1.010111 |
| # 68: | 42(N) | 43(O): | 0.973731 | # 68: | 48(N) | 49(O): | 0.979462 |
| # 69: | 42(N) | 44(O): | 0.958923 | # 69: | 48(N) | 50(O): | 1.003386 |
| # 70: | 45(N) | 46(O): | 0.984684 | # 70: | 51(N) | 52(O): | 0.993658 |
| # 71: | 45(N) | 47(O): | 0.969581 | # 71: | 51(N) | 53(O): | 0.953260 |
| # 72: | 48(N) | 49(O): | 0.984389 | # 72: | 54(N) | 55(O): | 0.979939 |
| # 73: | 48(N) | 50(O): | 0.982634 | # 73: | 54(N) | 56(O): | 0.971699 |
| # 74: | 51(N) | 52(O): | 1.005725 | # 74: | 57(N) | 58(O): | 0.983181 |
| # 75: | 51(N) | 53(O): | 0.883704 | # 75: | 57(N) | 59(O): | 0.968645 |
| # 76: | 54(N) | 83(H): | 0.675180 | # 76: | 60(N) | 61(O): | 0.986216 |
| # 77: | 54(N) | 84(H): | 0.677139 | # 77: | 60(N) | 62(O): | 0.951808 |
| # 78: | 55(N) | 56(O): | 1.002114 |       |       |        |          |
| # 79: | 55(N) | 57(O): | 0.881884 | # 56: | 34(N) | 35(N): | 0.629286 |
| # 80: | 58(N) | 79(H): | 0.672358 |       |       |        |          |
| # 81: | 58(N) | 80(H): | 0.674319 |       |       |        |          |
| # 82: | 59(N) | 60(O): | 1.002855 |       |       |        |          |
| # 83: | 59(N) | 61(O): | 0.878625 |       |       |        |          |
| # 84: | 62(N) | 77(H): | 0.673495 |       |       |        |          |
| # 85: | 62(N) | 78(H): | 0.672189 |       |       |        |          |
| # 86: | 63(N) | 64(O): | 1.008426 |       |       |        |          |
| # 87: | 63(N) | 65(O): | 0.876652 |       |       |        |          |
| # 88: | 66(N) | 81(H): | 0.671659 |       |       |        |          |
| # 89: | 66(N) | 82(H): | 0.672527 |       |       |        |          |
| # 88: | 66(N) | 81(H): | 0.671659 |       |       |        |          |

---

**Table S4.** Specific data of  $C_{p,m}^\theta$ ,  $S_m^\theta$  and  $H_m^\theta$ , just for A1 and A2

| T/K | A1                      |                                        |                                        | A2                      |                                        |                                        |
|-----|-------------------------|----------------------------------------|----------------------------------------|-------------------------|----------------------------------------|----------------------------------------|
|     | $H_m^\theta$            | $S_m^\theta$                           | $C_{p,m}^\theta$                       | $H_m^\theta$            | $S_m^\theta$                           | $C_{p,m}^\theta$                       |
|     | (kJ mol <sup>-1</sup> ) | (J mol <sup>-1</sup> K <sup>-1</sup> ) | (J mol <sup>-1</sup> K <sup>-1</sup> ) | (kJ mol <sup>-1</sup> ) | (J mol <sup>-1</sup> K <sup>-1</sup> ) | (J mol <sup>-1</sup> K <sup>-1</sup> ) |
| 200 | 35.4127                 | 612.9644                               | 291.4536                               | 37.70777                | 640.3654                               | 309.7545                               |
| 210 | 38.34014                | 627.2109                               | 301.1438                               | 40.81898                | 655.5073                               | 320.0136                               |
| 220 | 41.36471                | 641.2357                               | 310.7042                               | 44.0326                 | 670.4107                               | 330.1431                               |
| 230 | 44.48118                | 655.0554                               | 320.135                                | 47.34598                | 685.0923                               | 340.147                                |
| 240 | 47.69217                | 668.6785                               | 329.4276                               | 50.7565                 | 699.5648                               | 350.0087                               |
| 250 | 50.99242                | 682.1133                               | 338.5864                               | 54.26417                | 713.8406                               | 359.7365                               |
| 260 | 54.38457                | 695.3766                               | 347.6029                               | 57.86636                | 727.9323                               | 369.3221                               |
| 270 | 57.86335                | 708.4725                               | 356.4772                               | 61.56306                | 741.8483                               | 378.7654                               |
| 280 | 61.43141                | 721.4053                               | 365.2092                               | 65.35428                | 755.5886                               | 388.058                                |
| 290 | 65.08348                | 734.1874                               | 373.7948                               | 69.23477                | 769.1698                               | 397.2042                               |
| 300 | 68.82219                | 746.8231                               | 382.2381                               | 73.20715                | 782.5963                               | 406.1998                               |
| 310 | 72.64229                | 759.3123                               | 390.5308                               | 77.26618                | 795.8679                               | 415.0448                               |
| 320 | 76.54379                | 771.6635                               | 398.6728                               | 81.41184                | 808.9973                               | 423.7308                               |
| 330 | 80.52405                | 783.885                                | 406.6685                               | 85.64415                | 821.9845                               | 432.2662                               |
| 340 | 84.58569                | 795.9725                               | 414.5093                               | 89.96047                | 834.8335                               | 440.6425                               |
| 350 | 88.72348                | 807.9346                               | 422.2036                               | 94.35818                | 847.5487                               | 448.8599                               |
| 360 | 92.93478                | 819.7711                               | 429.7432                               | 98.83728                | 860.1342                               | 456.9183                               |
| 370 | 97.22223                | 831.4863                               | 437.1322                               | 103.3952                | 872.5899                               | 464.8177                               |

---

|     |          |          |          |          |          |          |
|-----|----------|----------|----------|----------|----------|----------|
| 380 | 101.5832 | 843.0844 | 444.3663 | 108.0318 | 884.9202 | 472.5581 |
| 390 | 106.015  | 854.5653 | 451.4498 | 112.7446 | 897.1333 | 480.1353 |
| 400 | 110.5178 | 865.9332 | 458.3785 | 117.5335 | 909.2209 | 487.5535 |
| 410 | 115.0861 | 877.1923 | 465.1608 | 122.3933 | 921.1913 | 494.8128 |
| 420 | 119.7228 | 888.3385 | 471.7882 | 127.3266 | 933.0487 | 501.913  |
| 430 | 124.425  | 899.3759 | 478.2692 | 132.3282 | 944.789  | 508.8543 |
| 440 | 129.1929 | 910.3045 | 484.6038 | 137.4006 | 956.4206 | 515.6366 |
| 450 | 134.0212 | 921.1327 | 490.7878 | 142.5387 | 967.9391 | 522.264  |
| 460 | 138.9125 | 931.8563 | 496.8295 | 147.7425 | 979.3489 | 528.7408 |
| 470 | 143.8616 | 942.4753 | 502.7331 | 153.0092 | 990.654  | 535.0629 |
| 480 | 148.8711 | 952.9939 | 508.4903 | 158.339  | 1001.85  | 541.2343 |
| 490 | 153.9357 | 963.4162 | 514.1136 | 163.7318 | 1012.938 | 547.2592 |
| 500 | 159.058  | 973.7381 | 519.5988 | 169.1823 | 1023.929 | 553.1377 |
| 510 | 164.2329 | 983.968  | 524.9501 | 174.6932 | 1034.816 | 558.874  |
| 520 | 169.4602 | 994.0975 | 530.1676 | 180.2593 | 1045.598 | 564.468  |
| 530 | 174.7427 | 1004.135 | 535.2595 | 185.8805 | 1056.284 | 569.9281 |
| 540 | 180.0725 | 1014.08  | 540.2259 | 191.5568 | 1066.874 | 575.2502 |
| 550 | 185.4522 | 1023.929 | 545.071  | 197.2857 | 1077.363 | 580.4383 |
| 560 | 190.8817 | 1033.691 | 549.7947 | 203.067  | 1087.756 | 585.501  |
| 570 | 196.3585 | 1043.364 | 554.4013 | 208.8982 | 1098.057 | 590.4339 |
| 580 | 201.8799 | 1052.945 | 558.8907 | 214.7767 | 1108.262 | 595.2455 |
| 590 | 207.4433 | 1062.443 | 563.2672 | 220.7051 | 1118.379 | 599.9358 |

---

---

|     |         |          |          |          |        |          |
|-----|---------|----------|----------|----------|--------|----------|
| 600 | 213.054 | 1071.853 | 567.5391 | 226.6808 | 1128.4 | 604.5089 |
|-----|---------|----------|----------|----------|--------|----------|

---
